# Supplementary material for: Synthesis of trifluoroalkyl or difluoroalkyl phenanthridine derivatives via cascade reaction using an intramolecular cyano group as a radical acceptor under photoredox catalysis
Source: Royal Society of Chemistry journal article supplement (doi:10.1039/c7ob02804k), 2017-12-04

Electronic Supplementary Information for

**Synthesis of trifluoroalkyl or difluoroalkyl phenanthridine  
derivatives via cascade reaction using intramolecular cyano group as  
a radical acceptor under photoredox catalysis**

Xu Liu, Zhongjie Wu, Zeguo Zhang, Ping Liu\* and Peipei Sun\*

*College of Chemistry and Materials Science, Jiangsu Provincial Key Laboratory of Material  
Cycle Processes and Pollution Control, Jiangsu Collaborative Innovation Center of Biomedical  
Functional Materials, Nanjing Normal University, Nanjing 210023, P. R. China*  
*pingliu@njnu.edu.cn, sunpeipei@njnu.edu.cn*

**Table of Contents**

1. NMR spectra of products **2**, **3** and **4**.....S2-S51

# 1. NMR spectra of products 2, 3 and 4

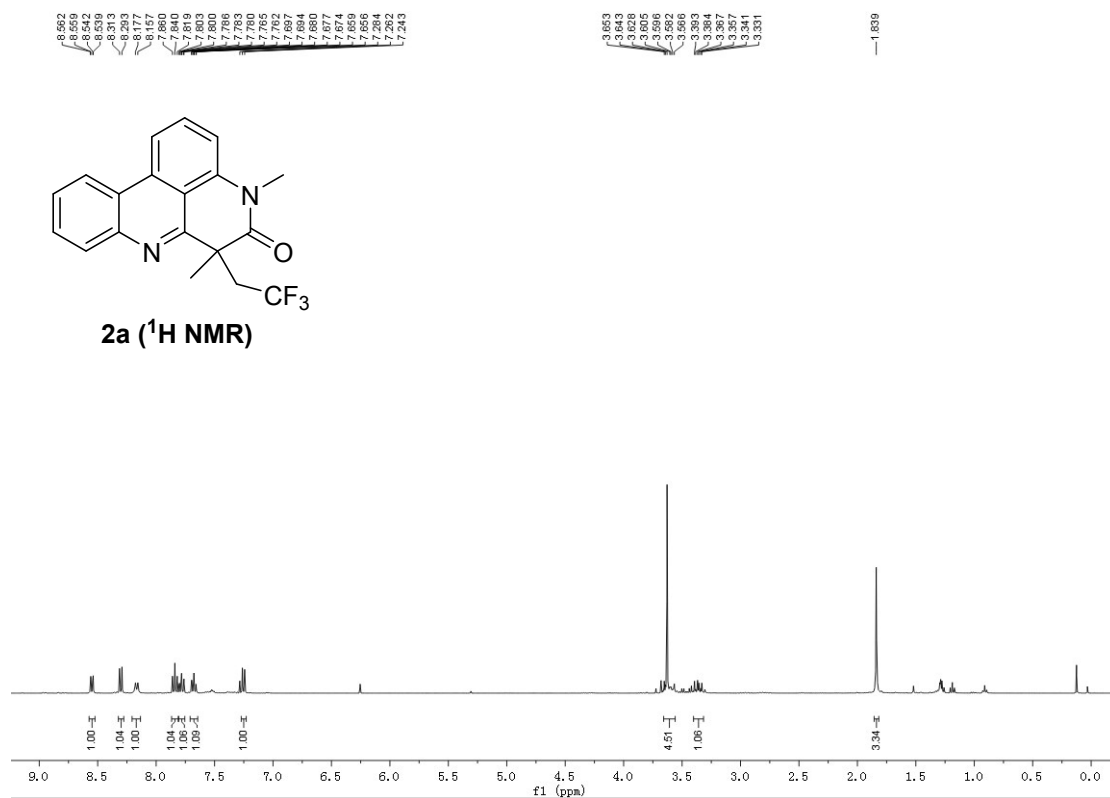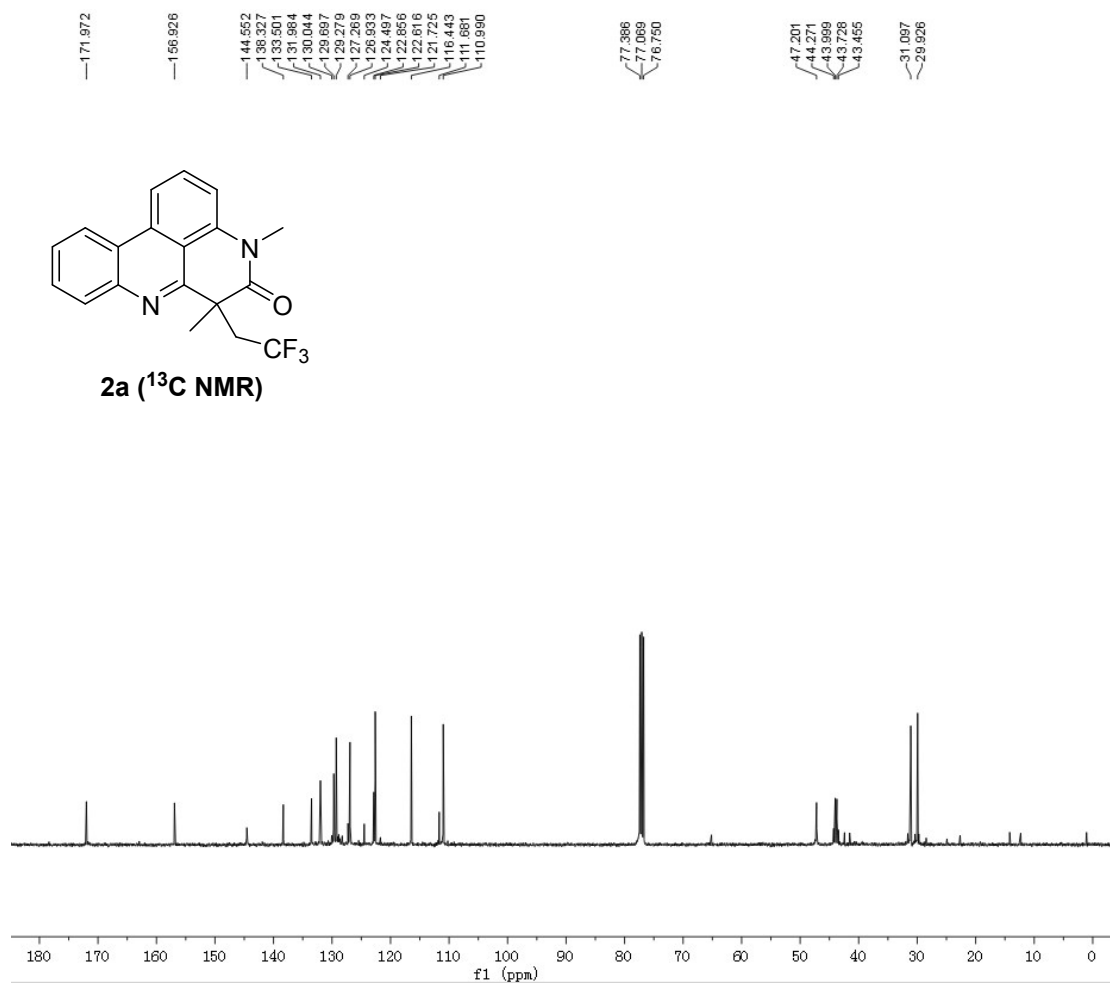



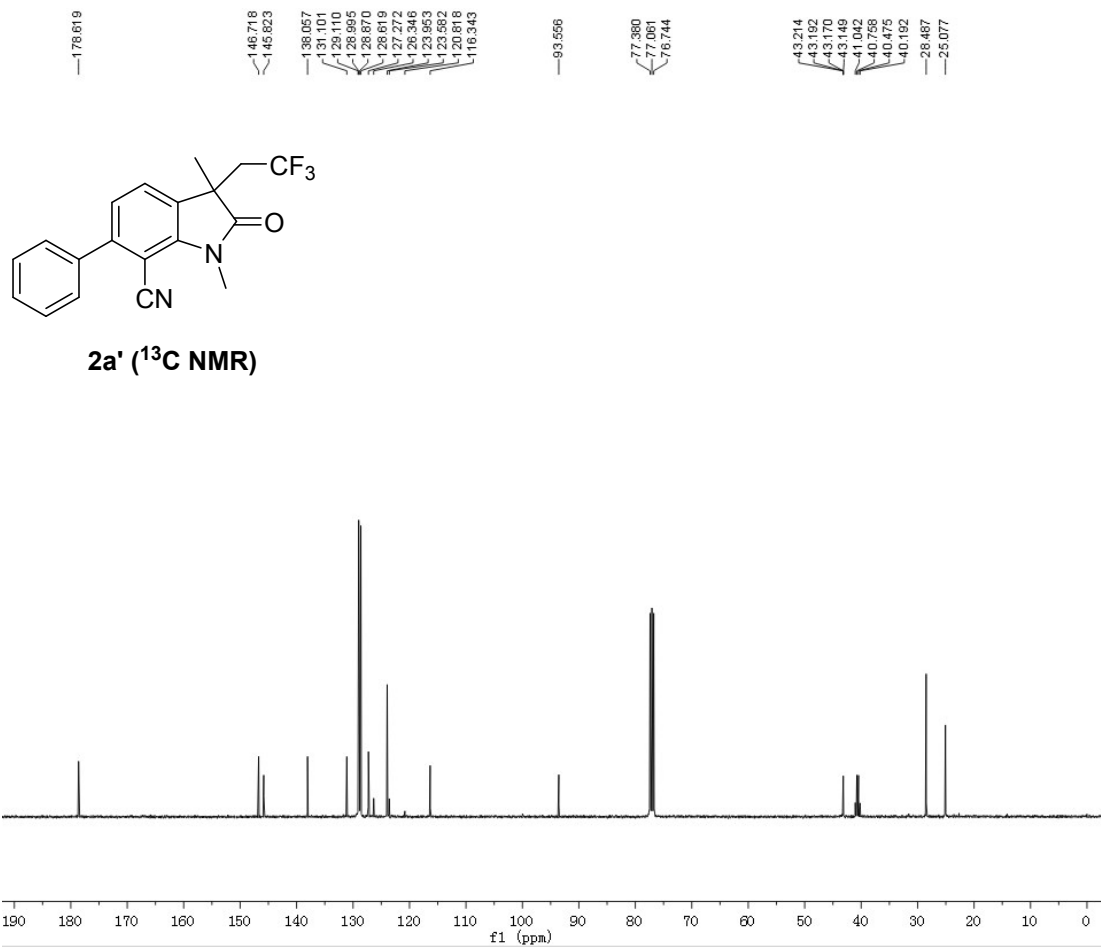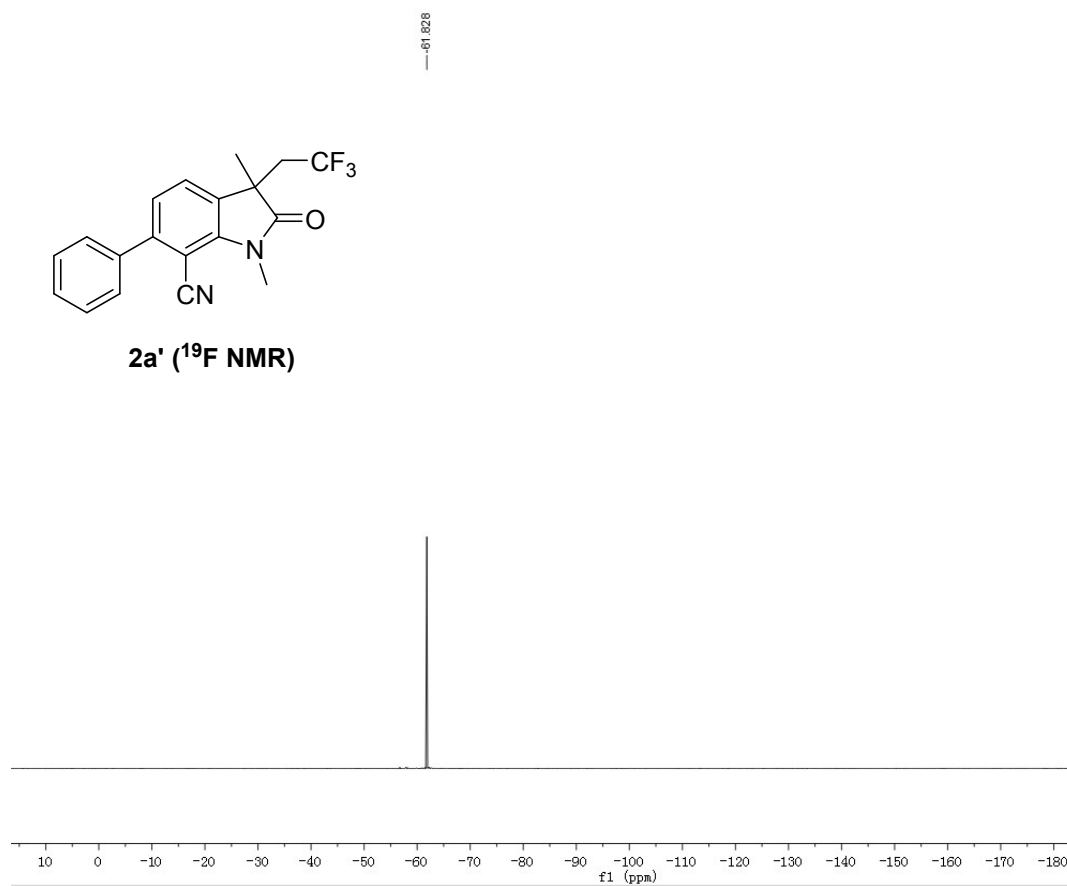

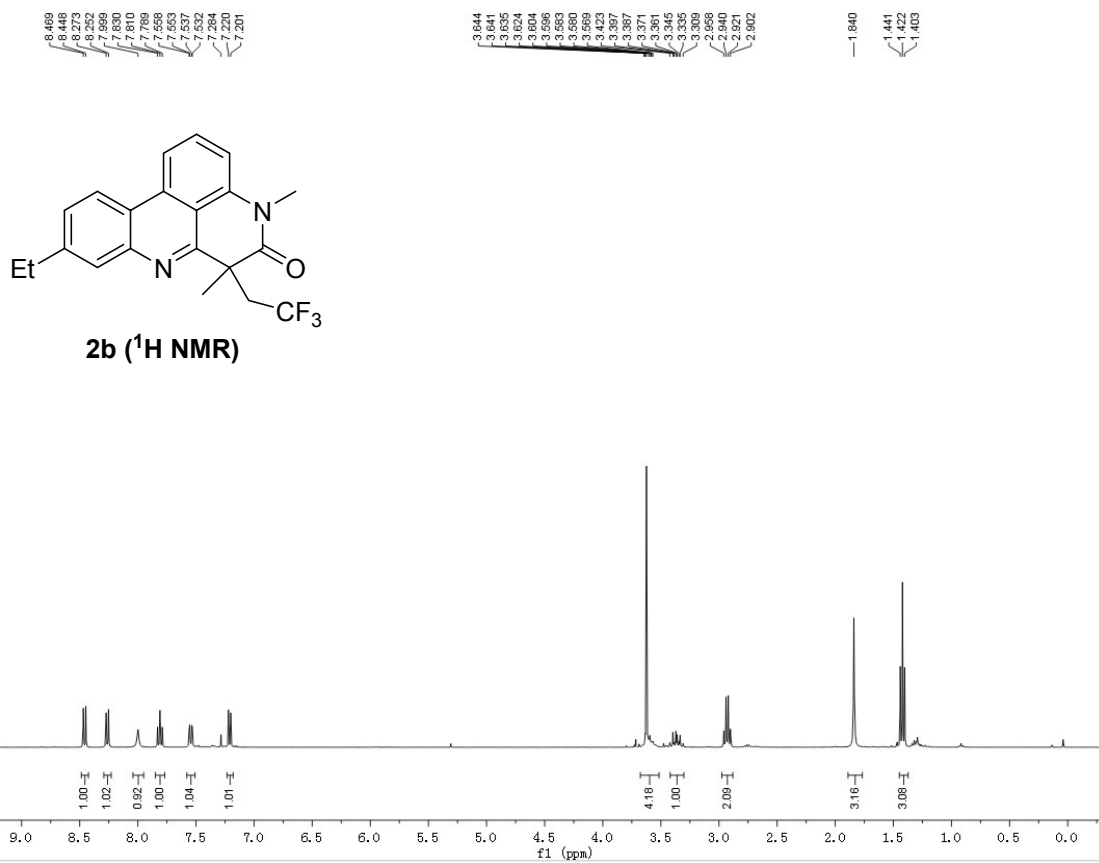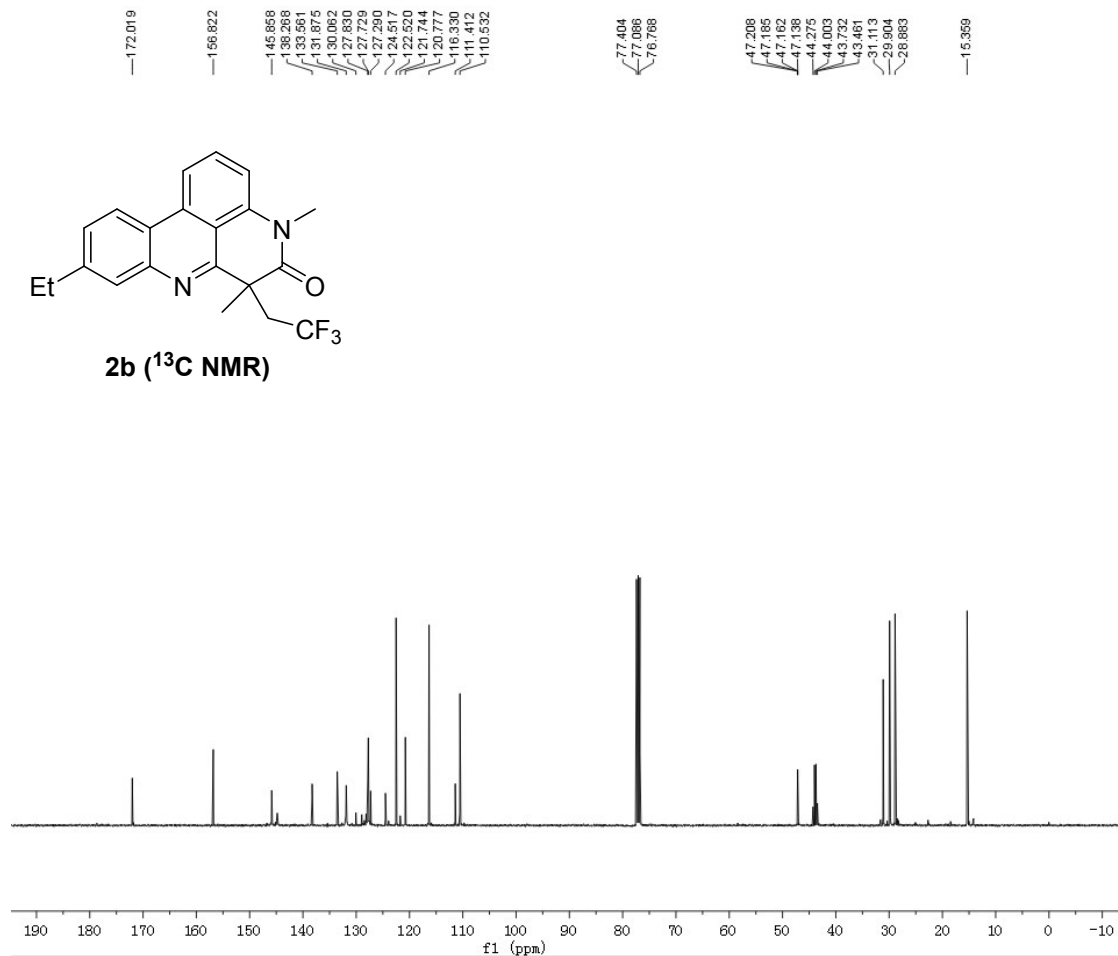

-61.058

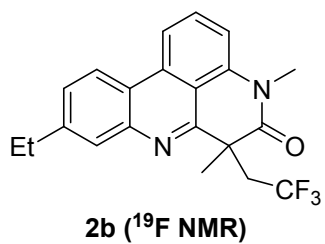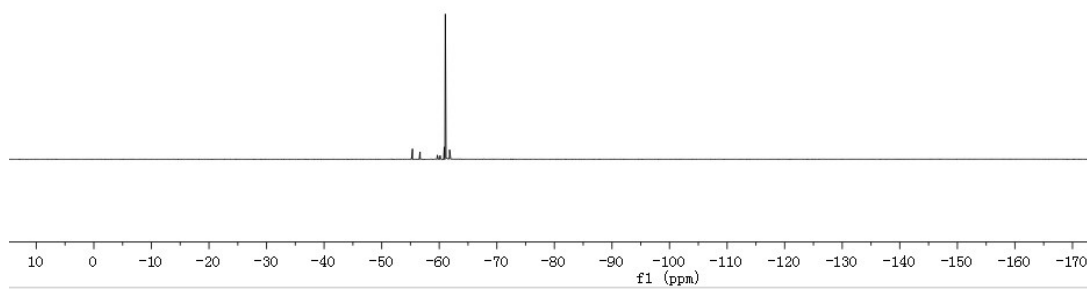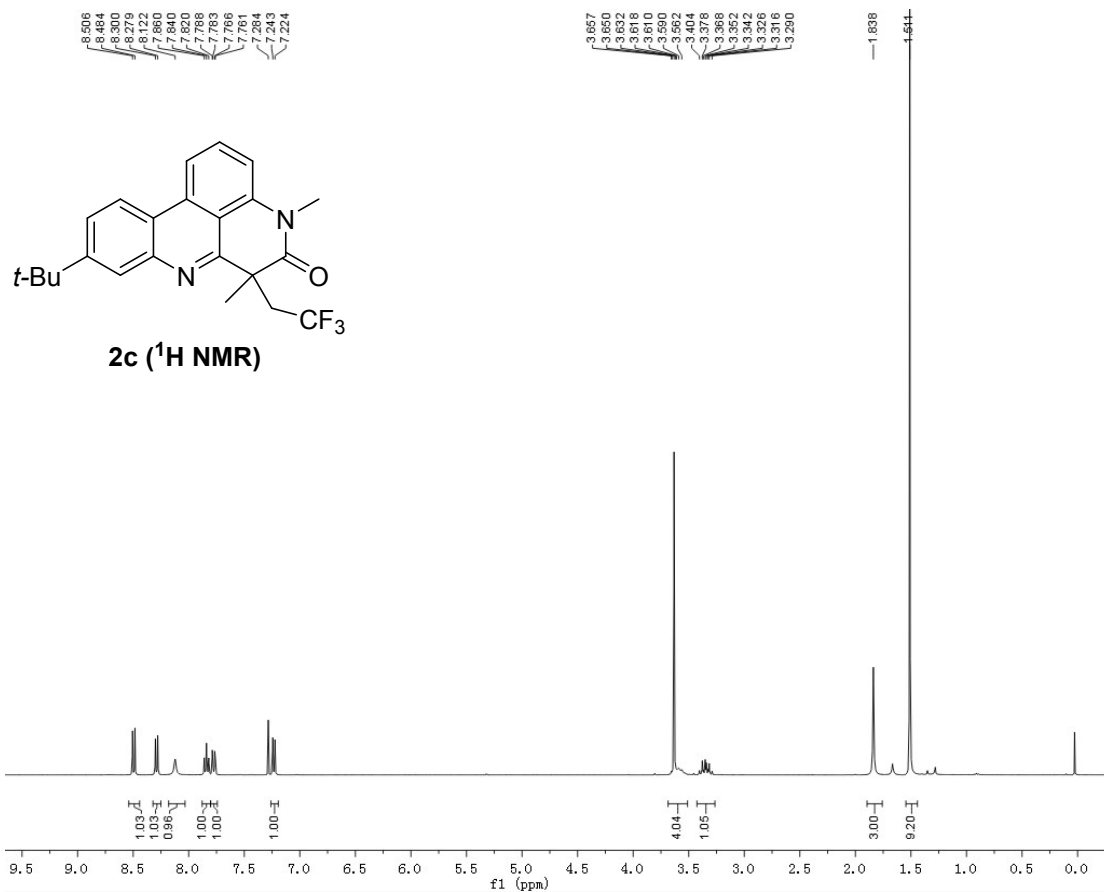

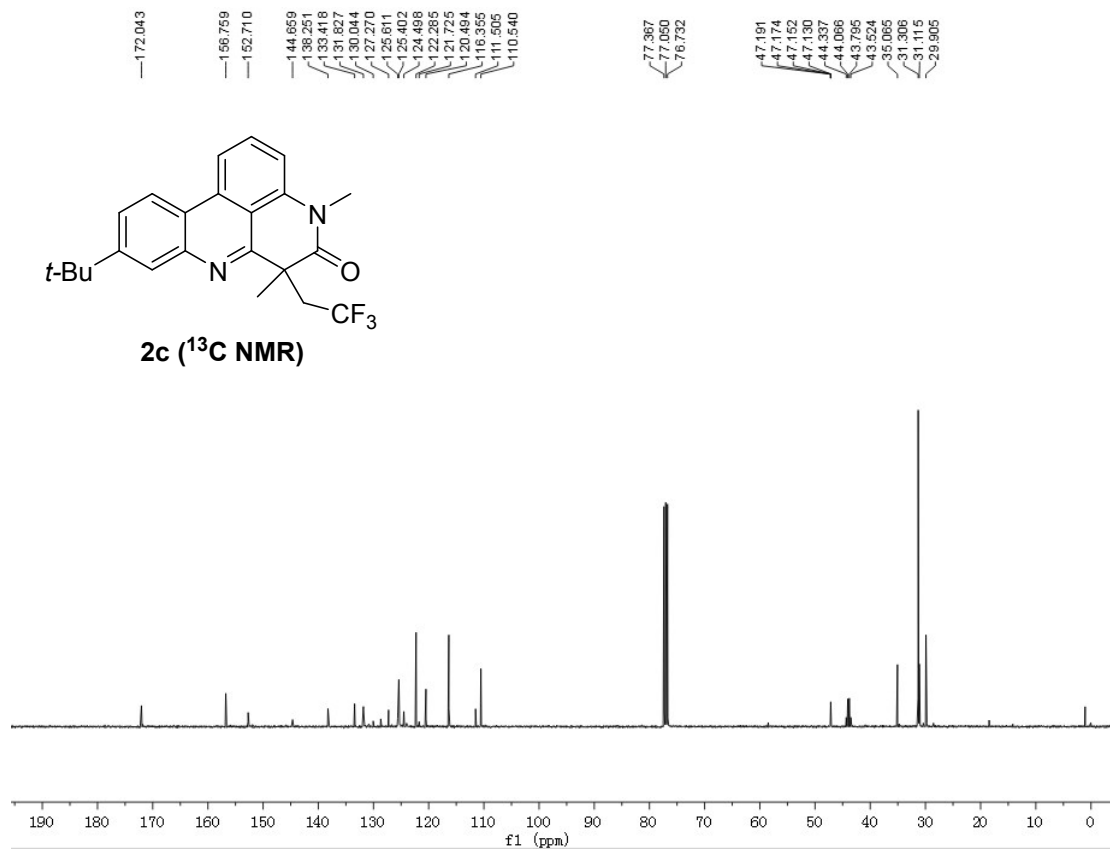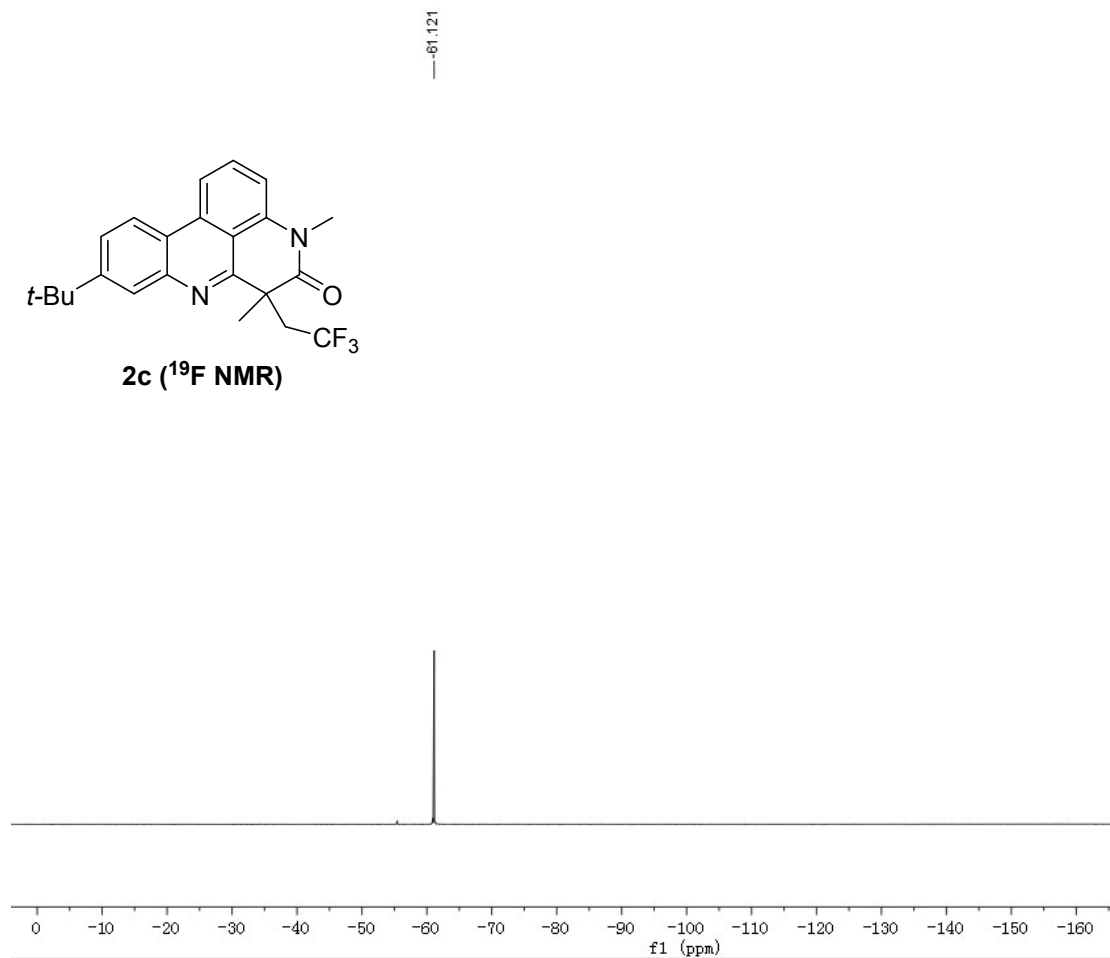

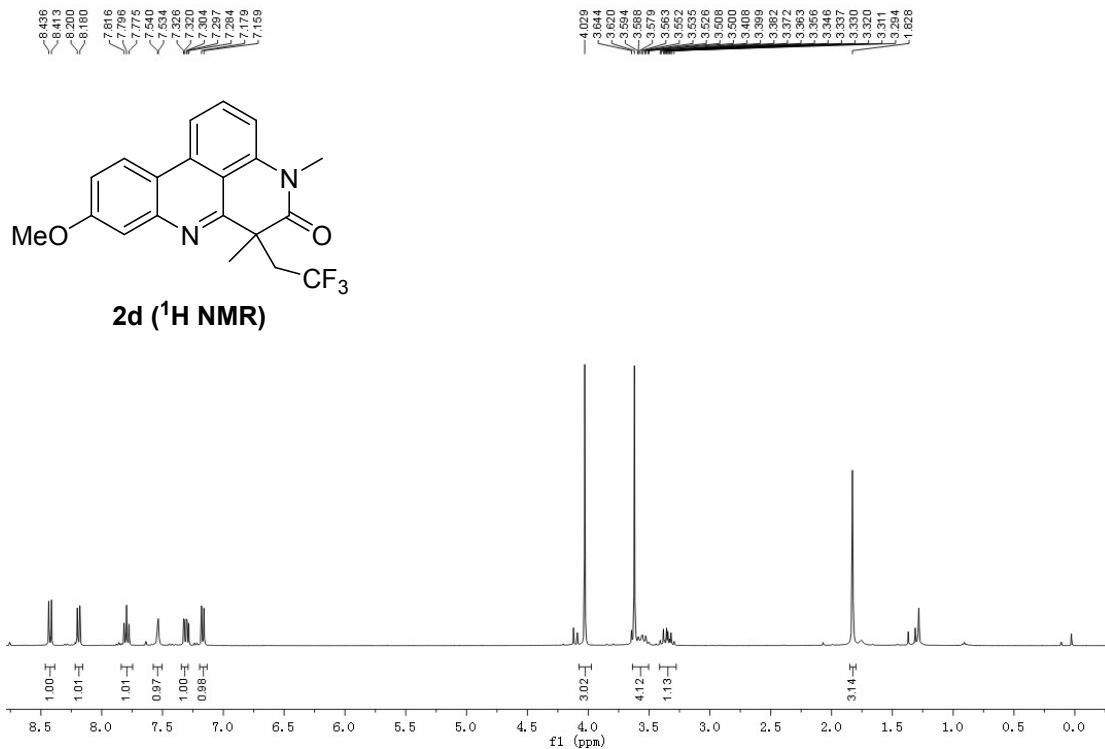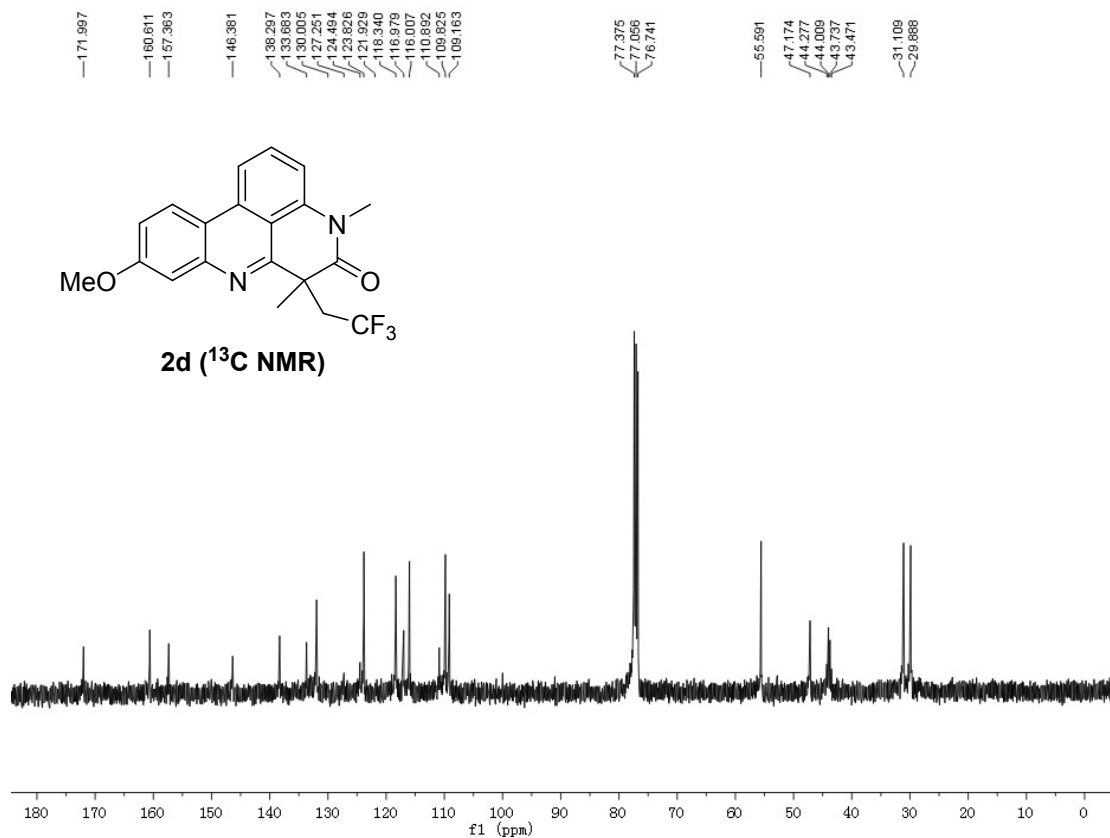



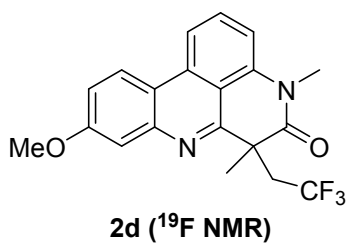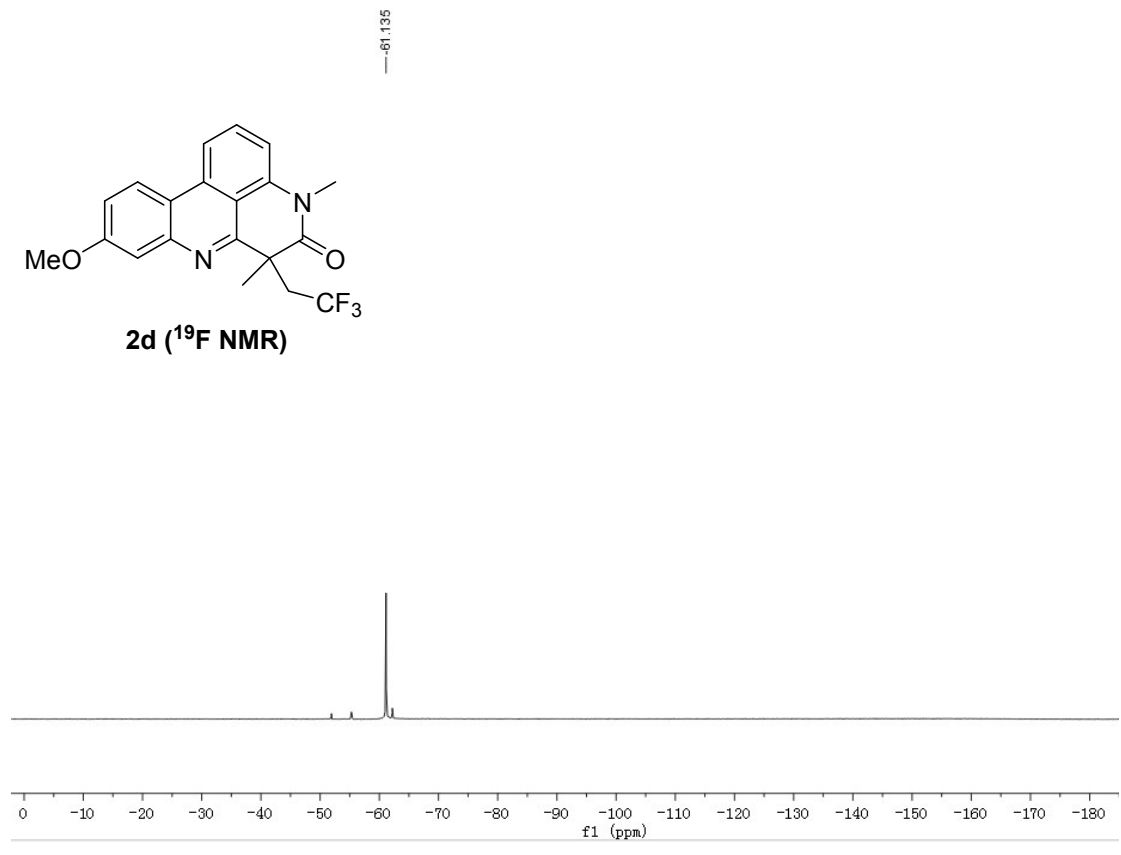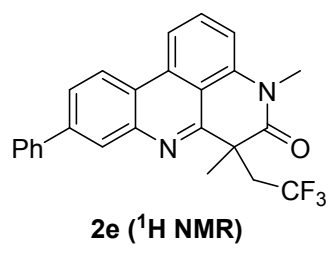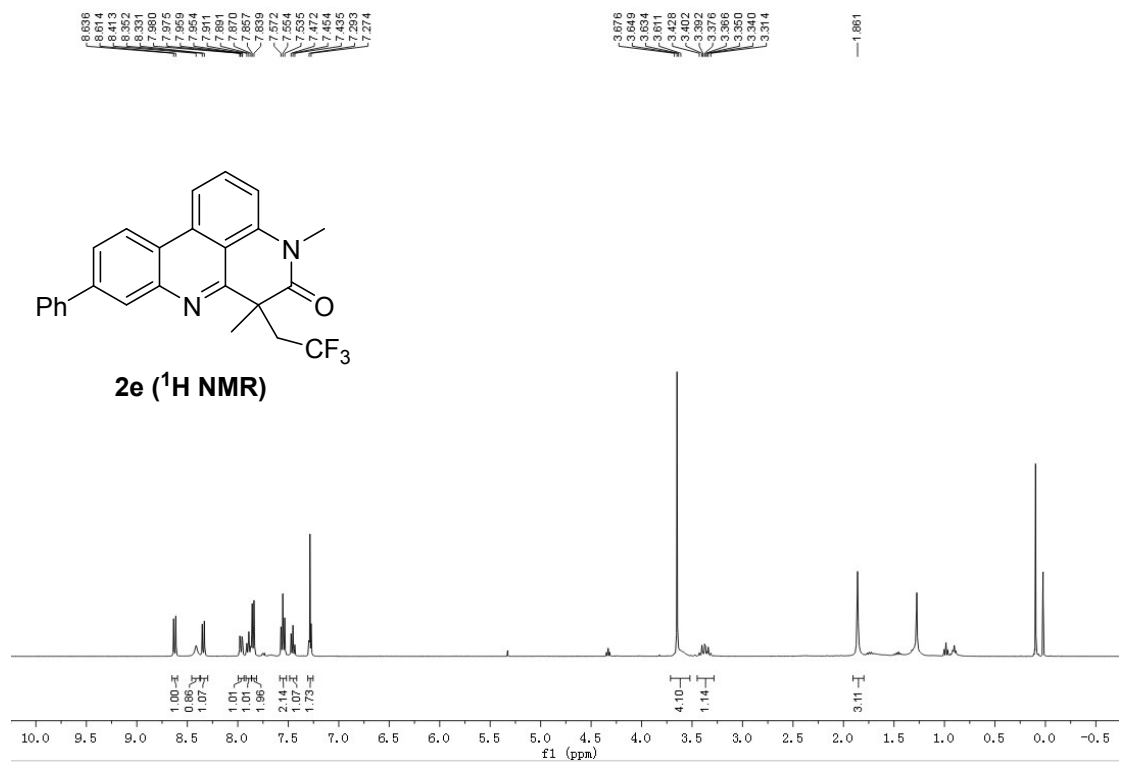

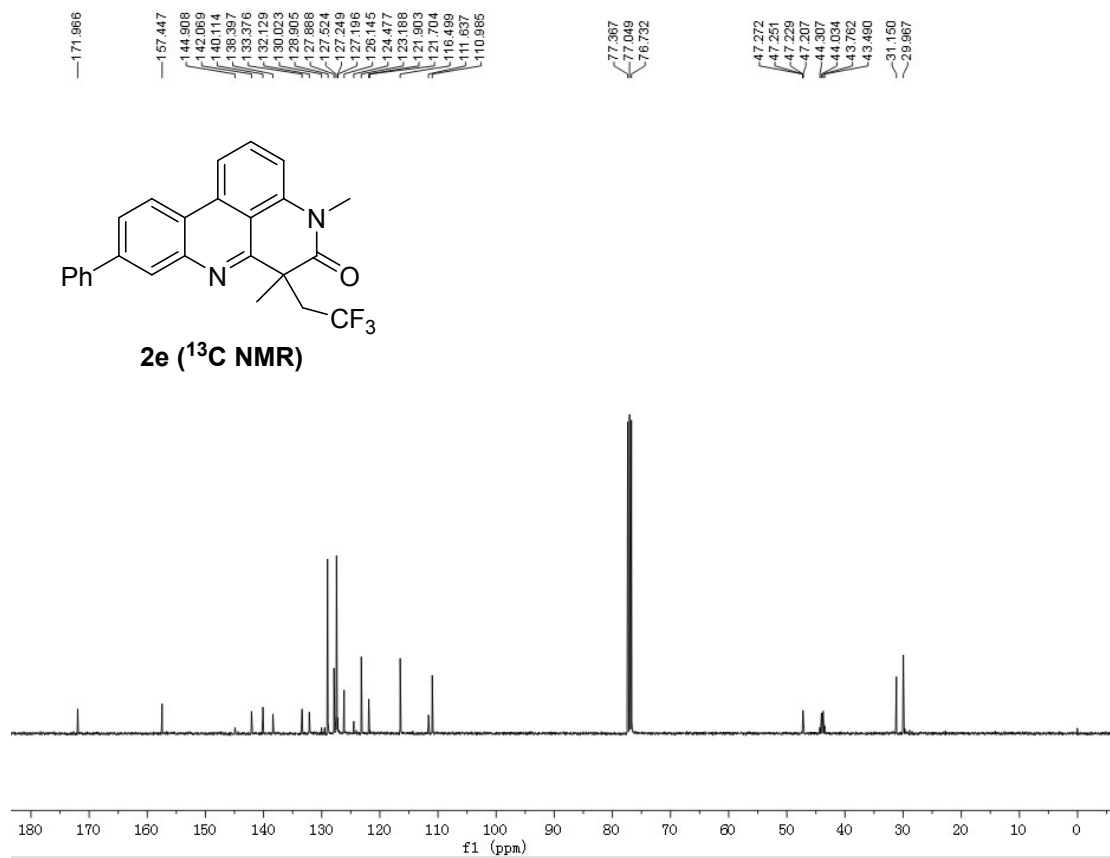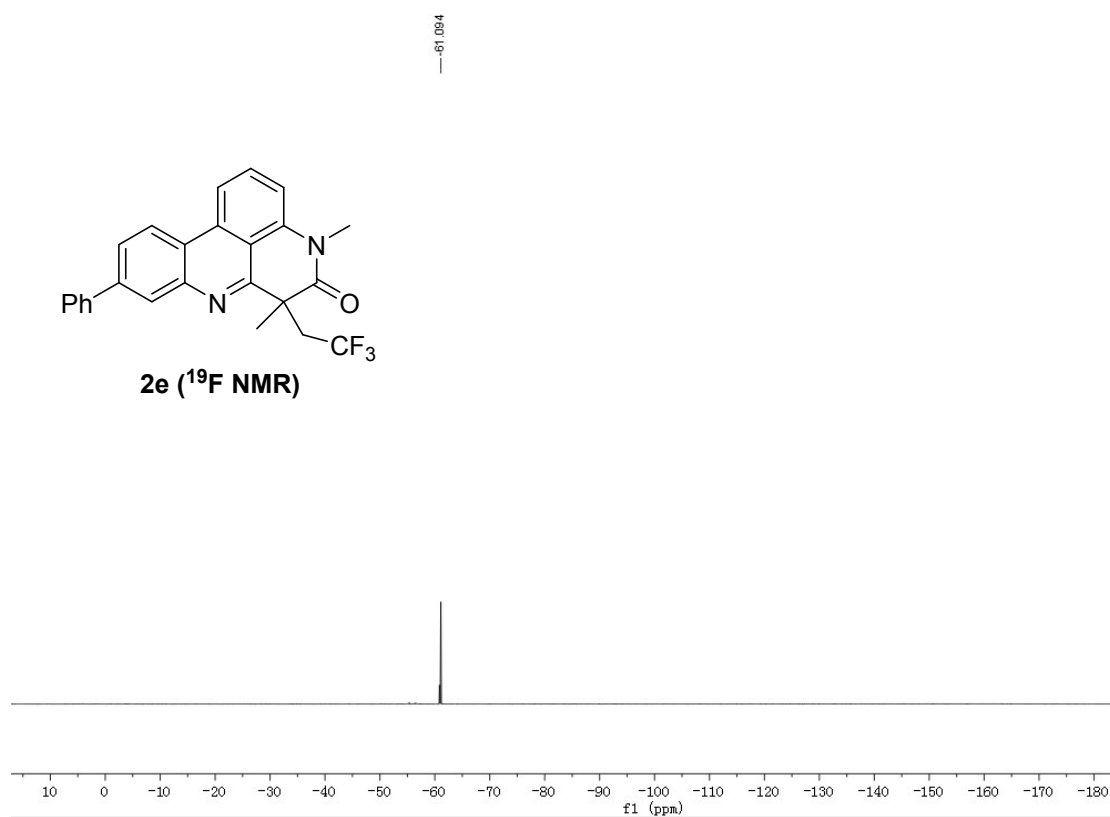

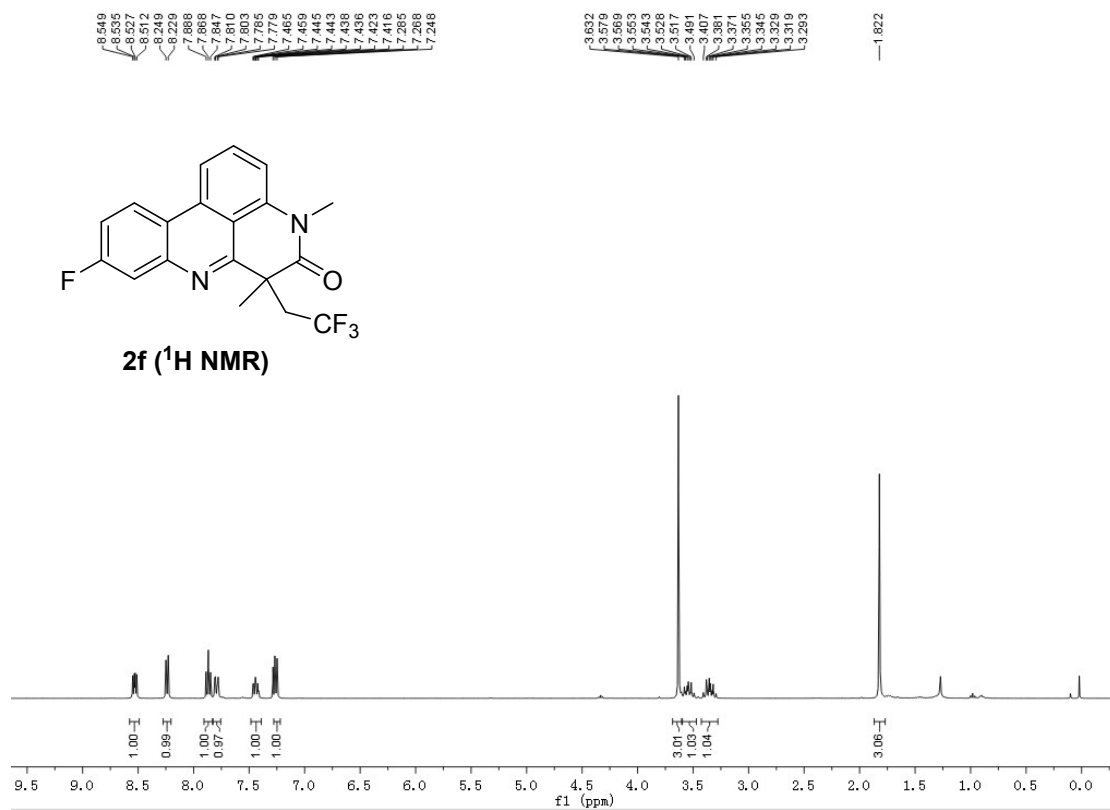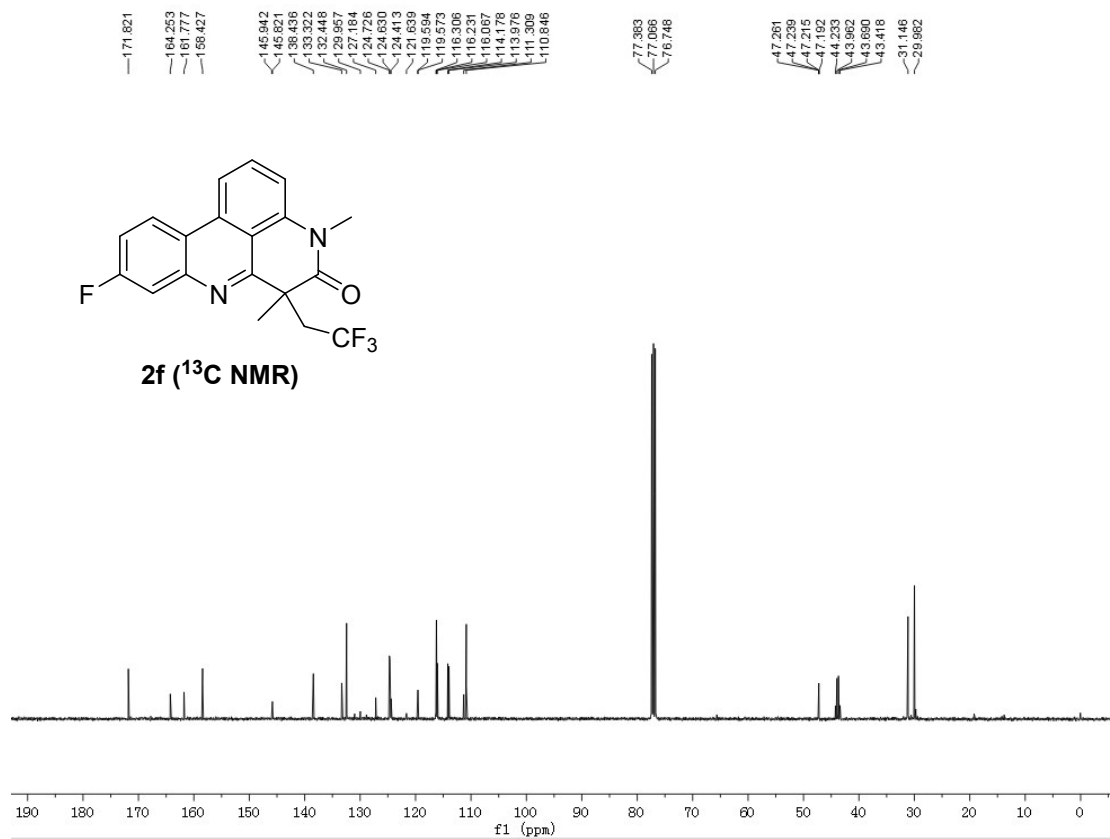

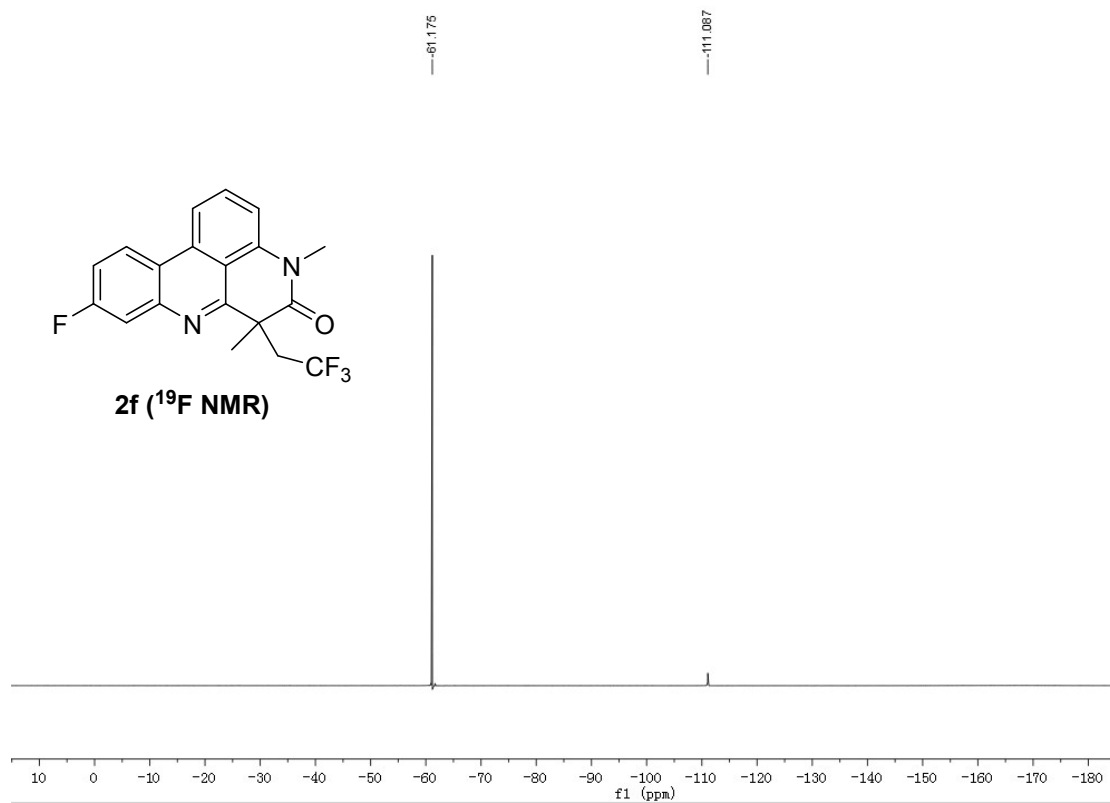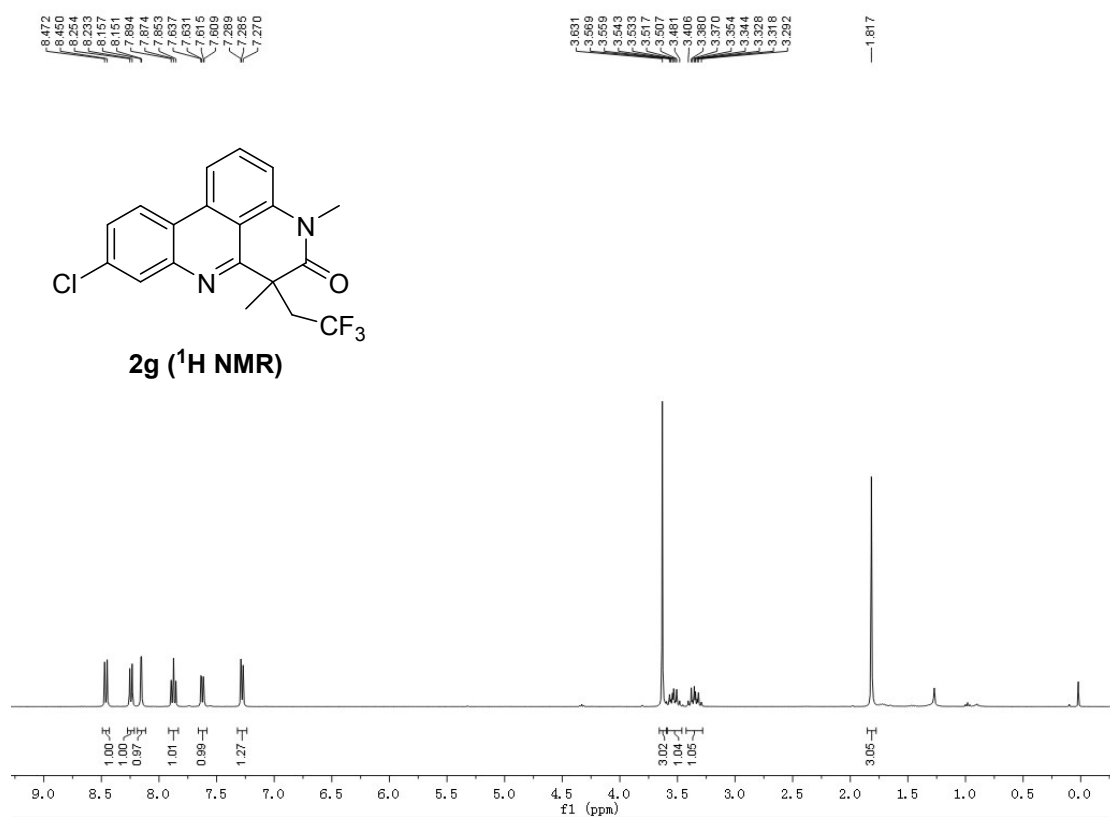

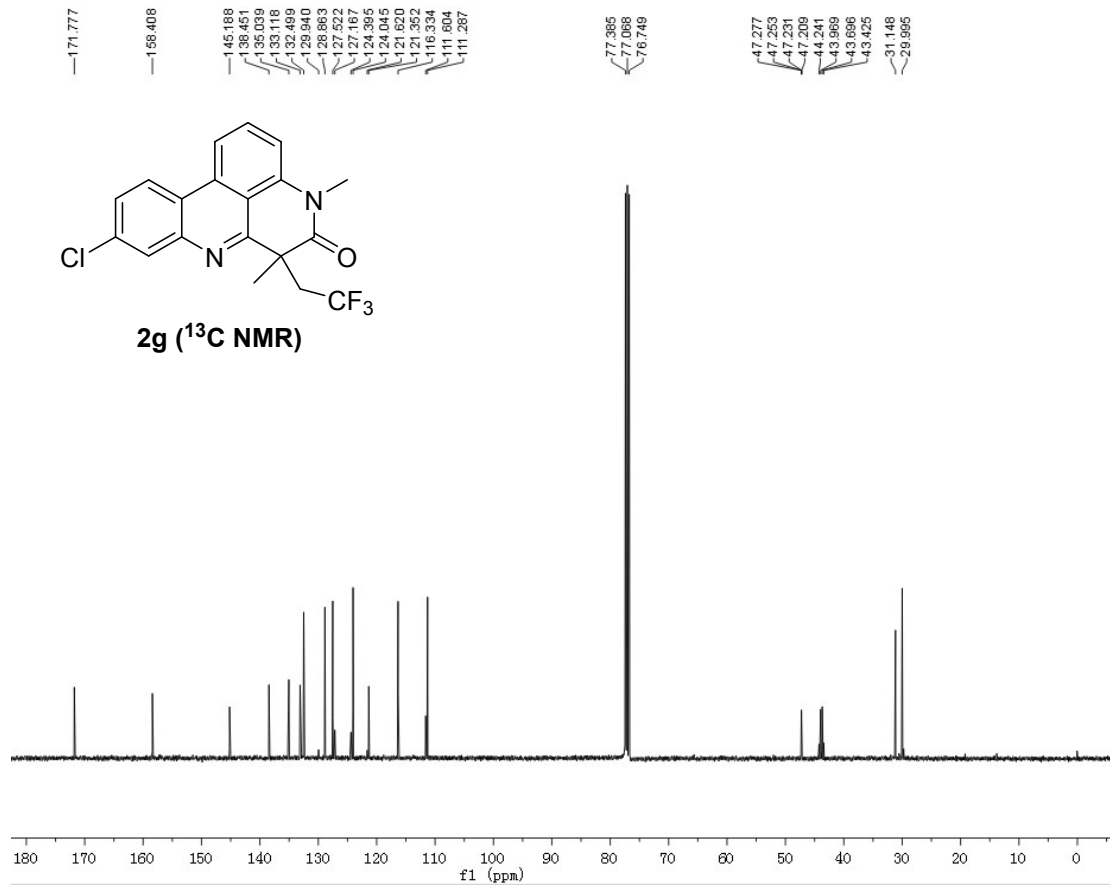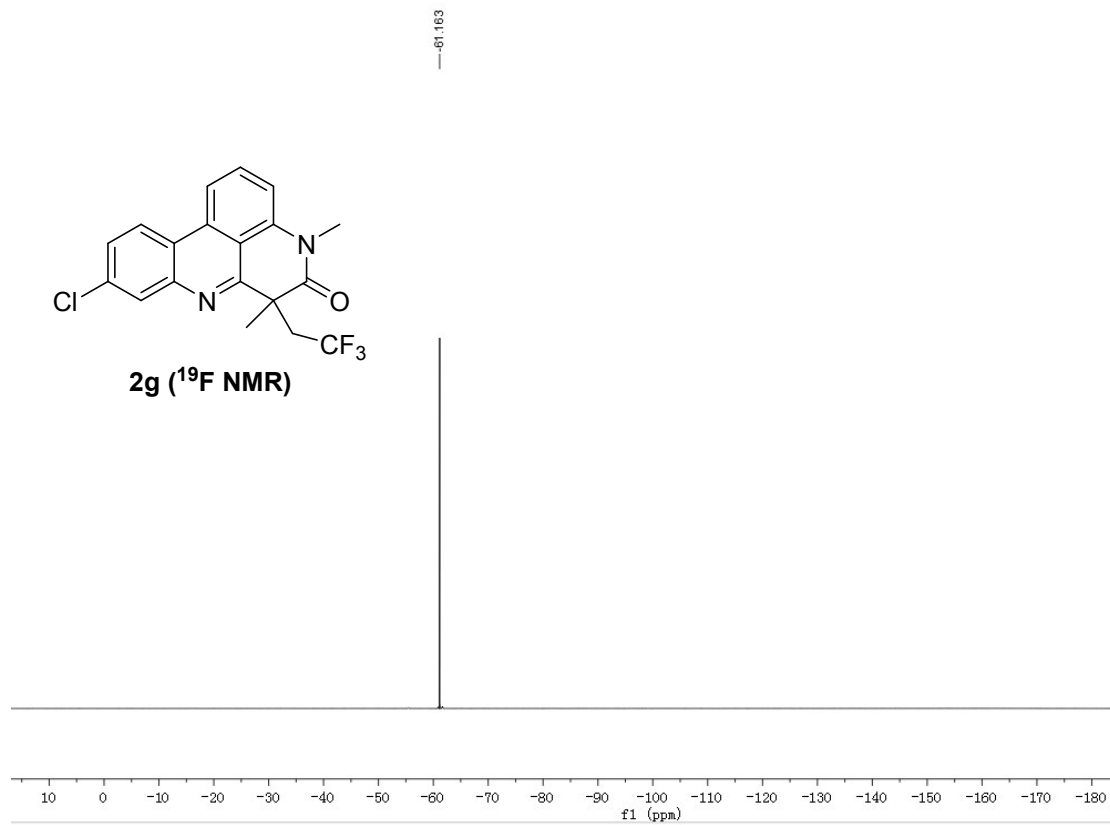

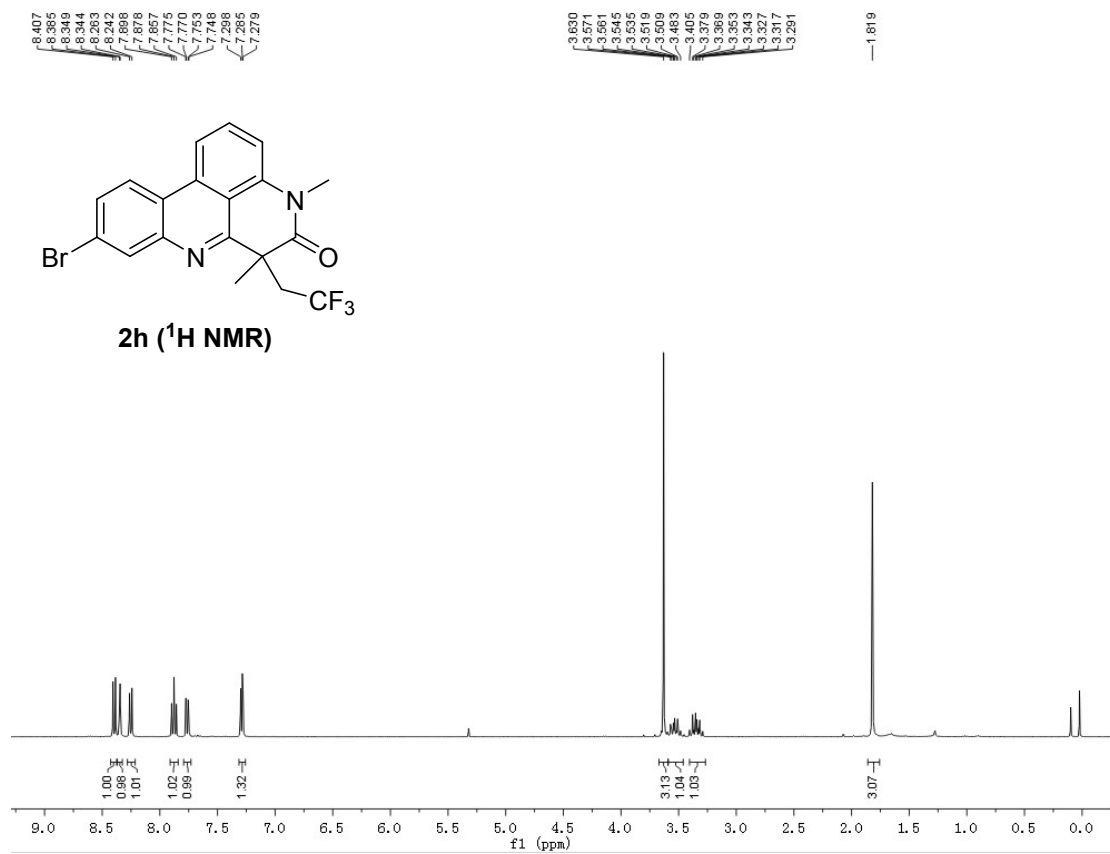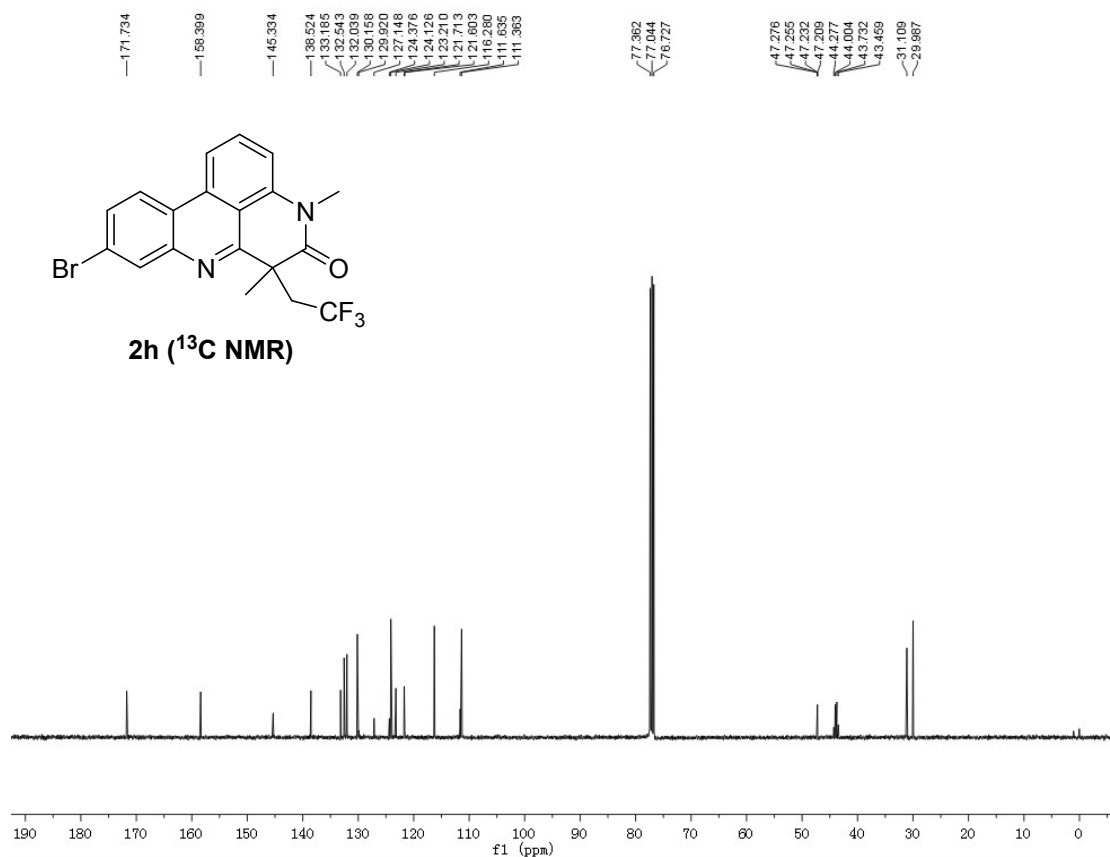

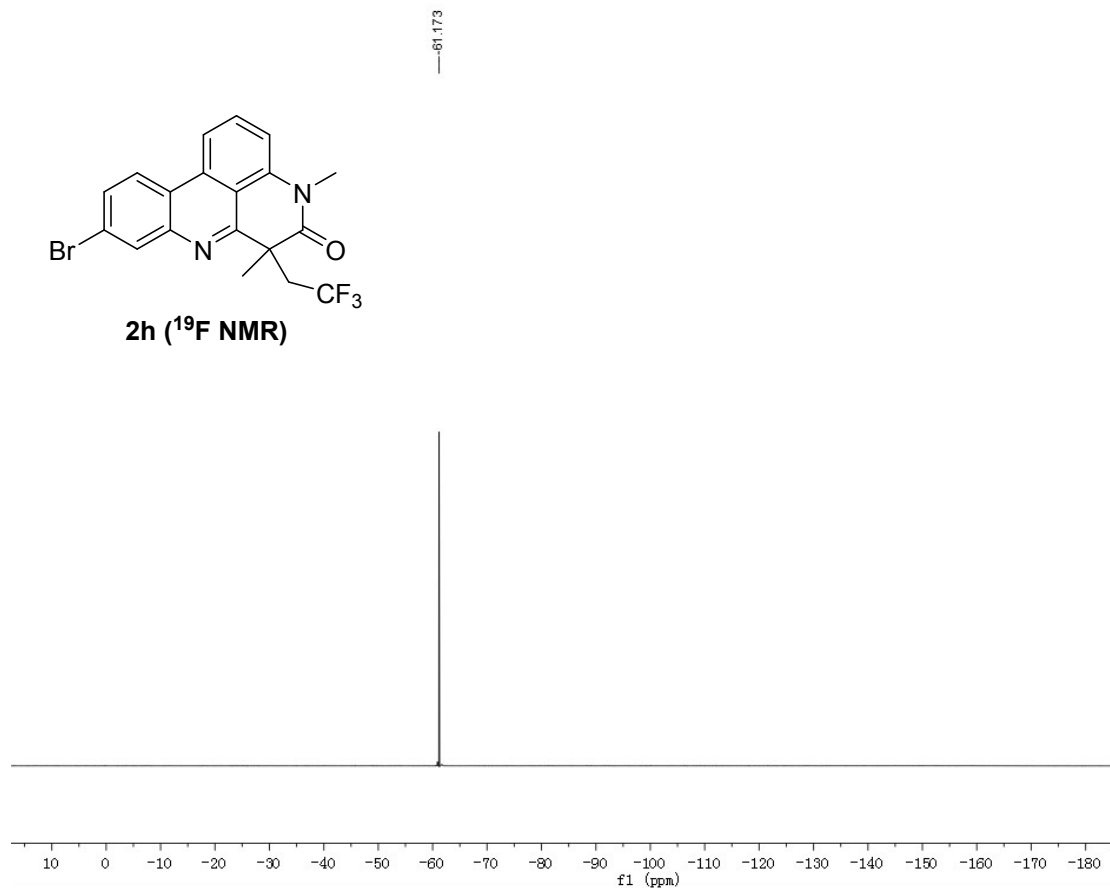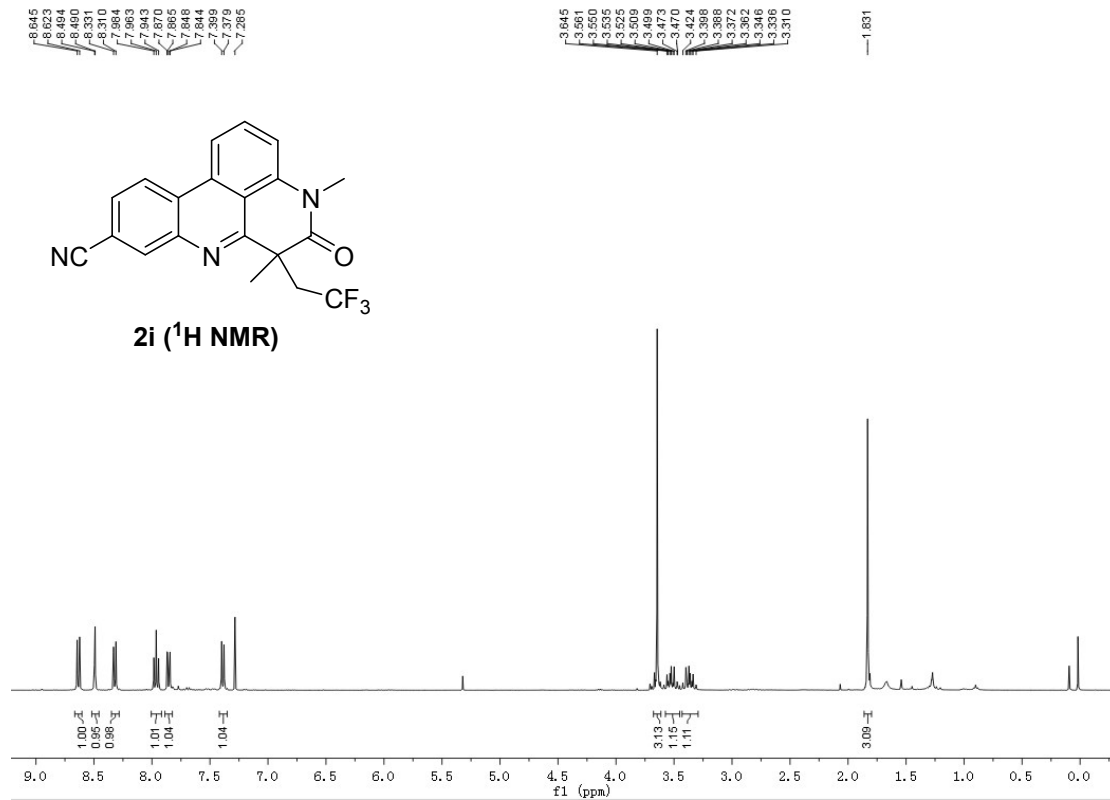

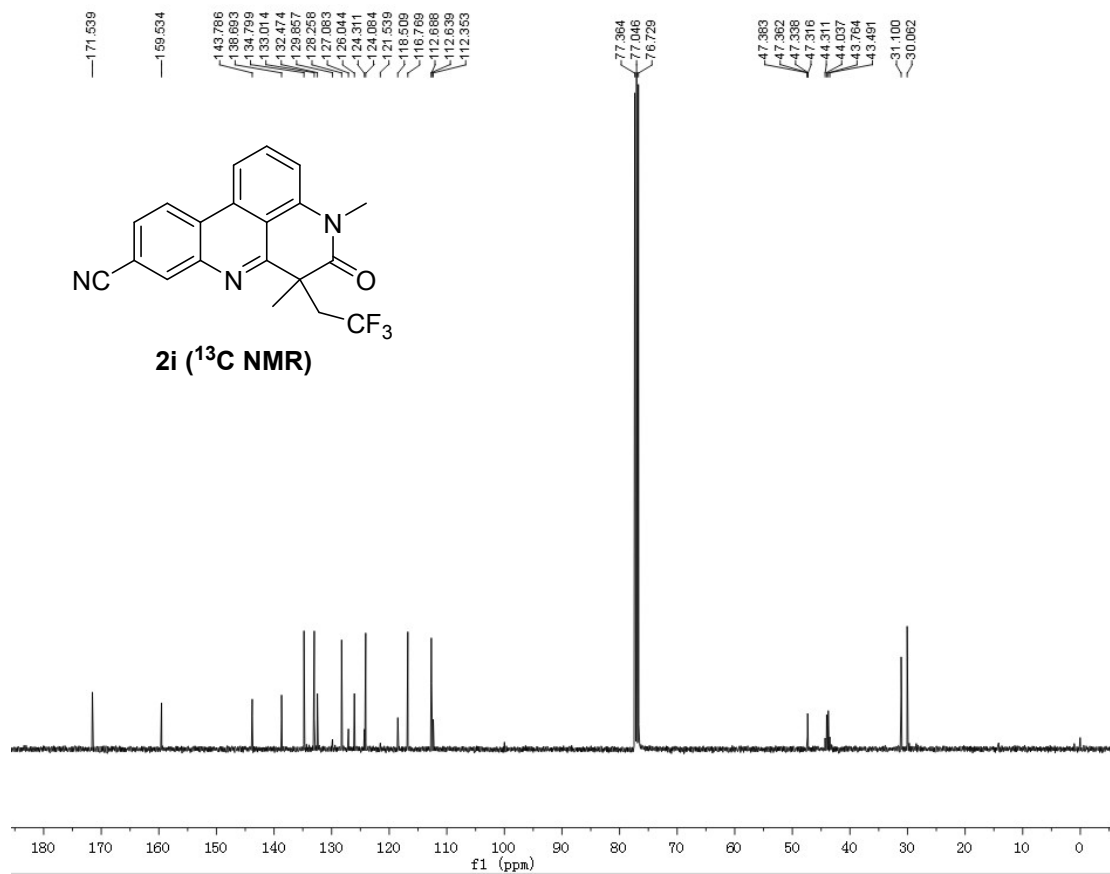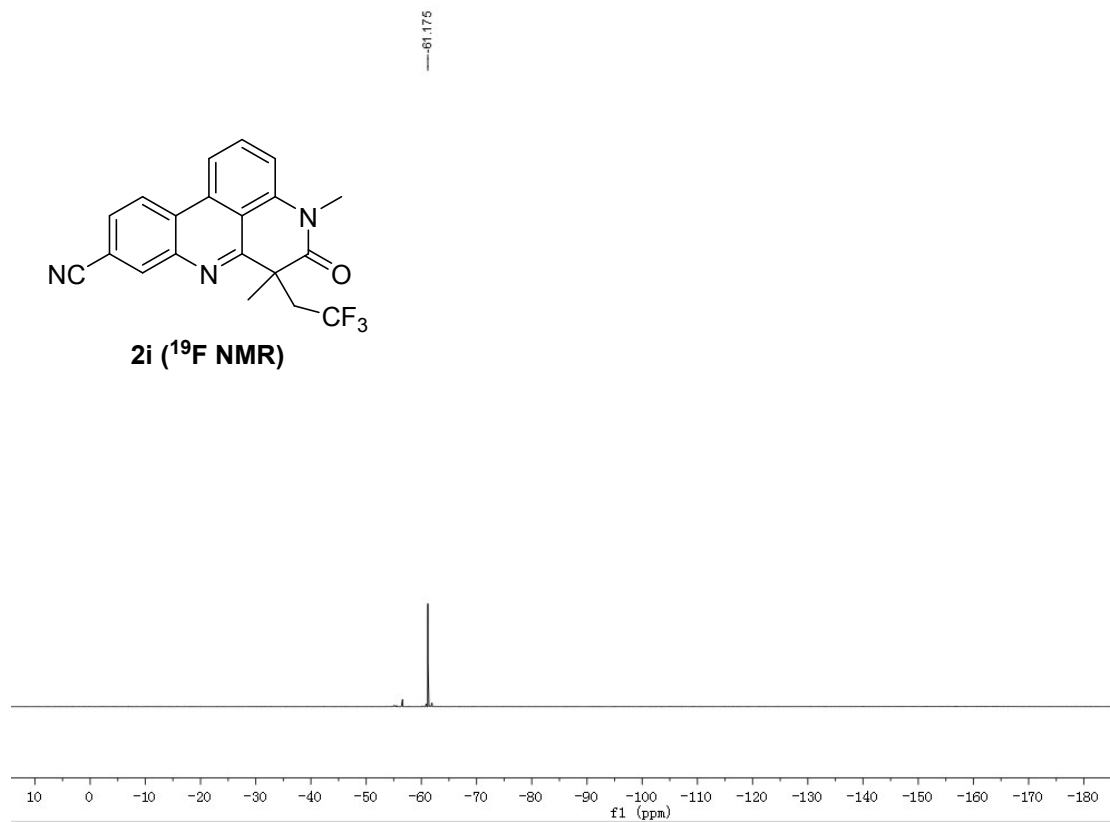



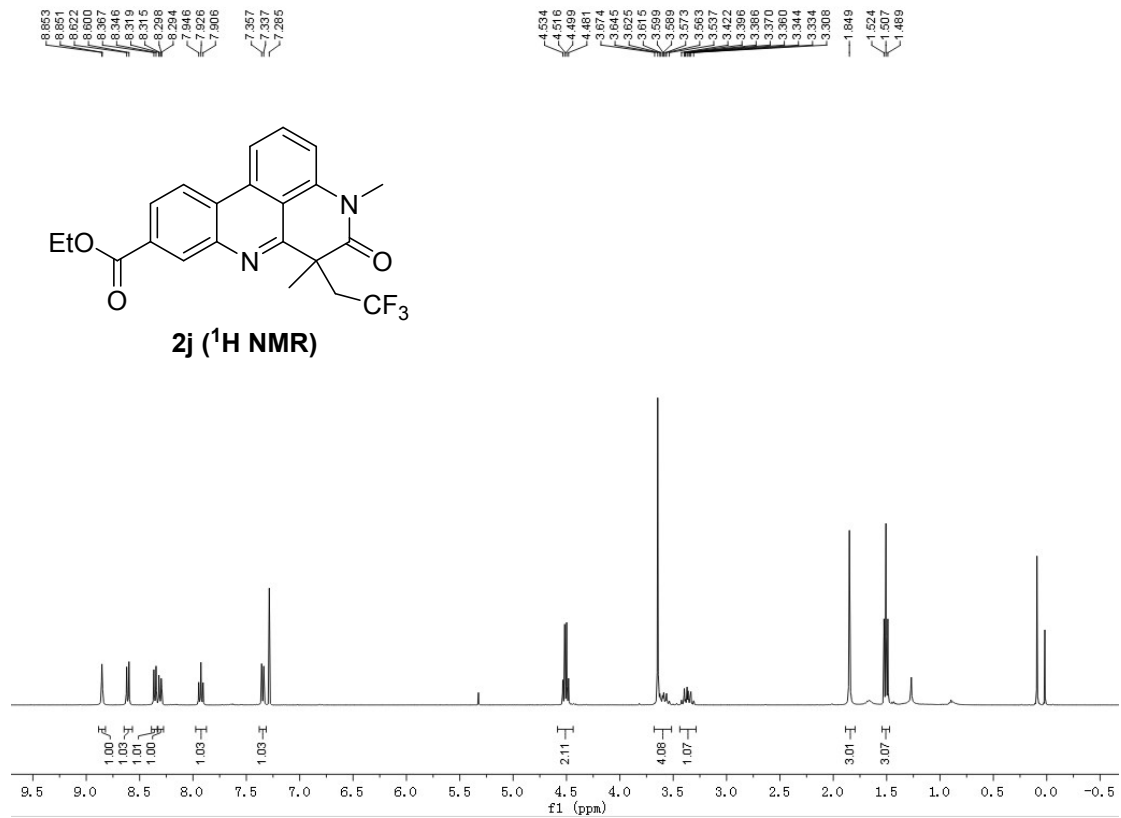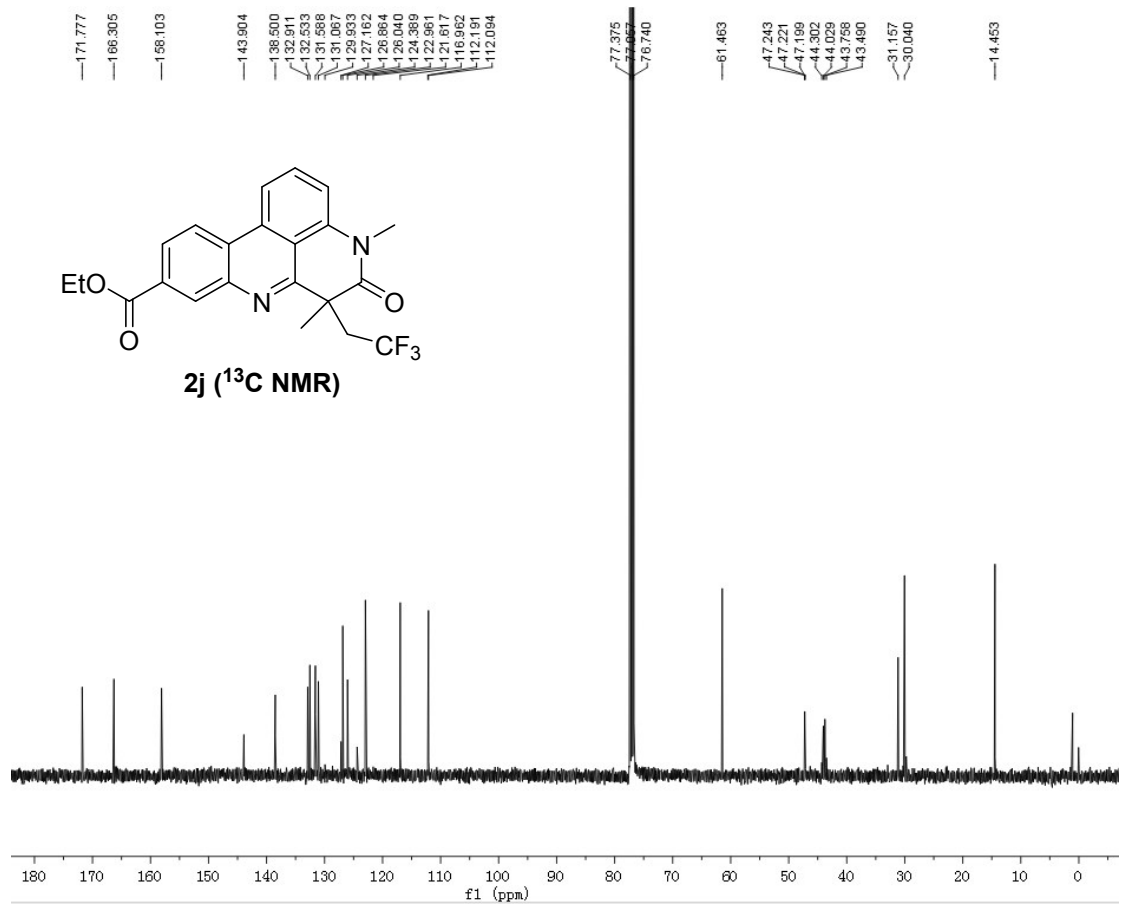

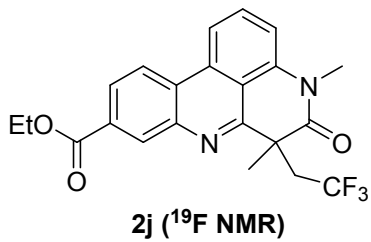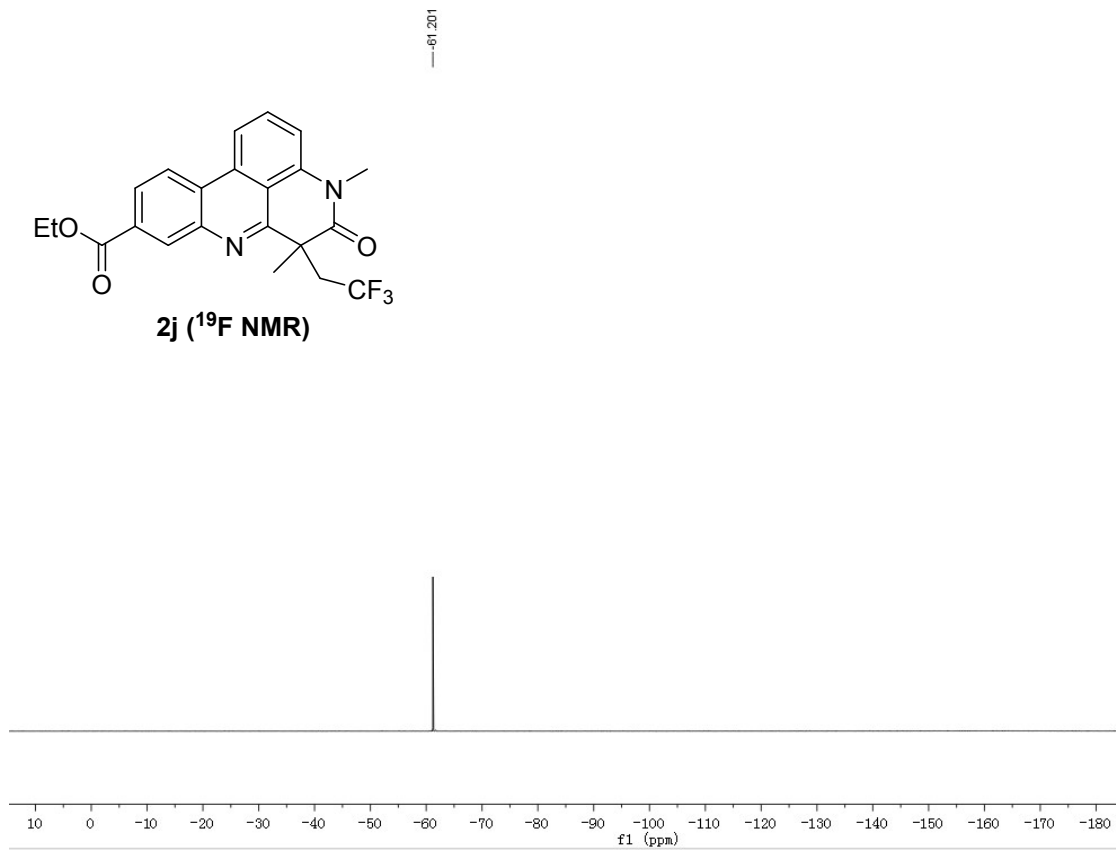

8.773  
8.769  
8.755  
8.733  
8.380  
8.359  
8.180  
8.175  
8.158  
8.153  
7.983  
7.962  
7.418  
7.398  
7.285

3.853  
3.897  
3.890  
3.879  
3.864  
3.853  
3.839  
3.827  
3.802  
3.432  
3.406  
3.398  
3.380  
3.370  
3.354  
3.344  
3.318  
3.230

— 1.845

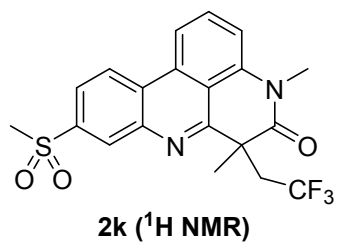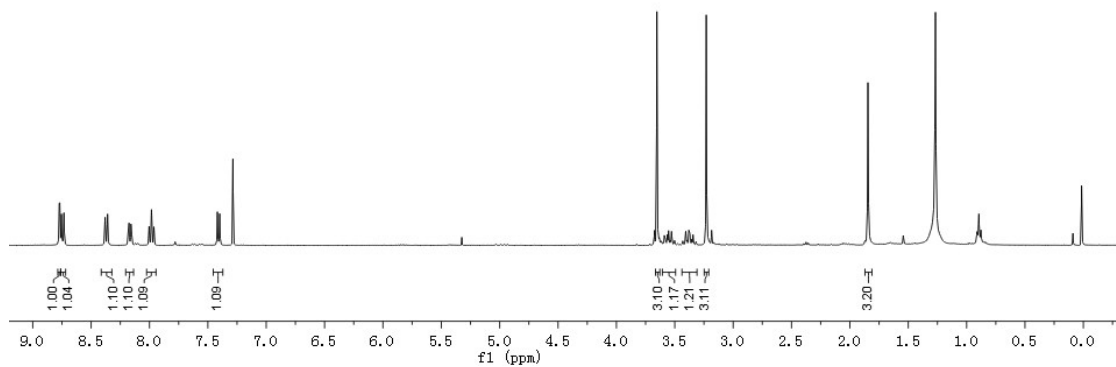

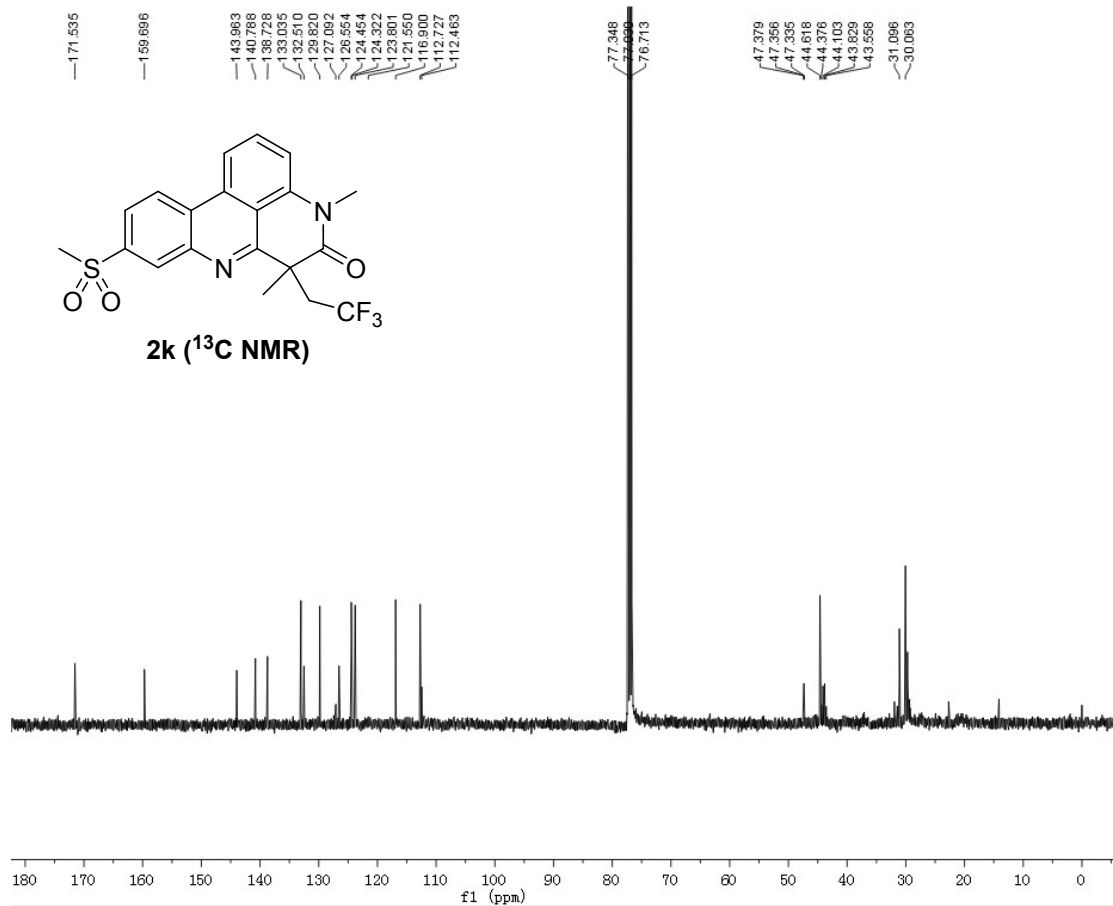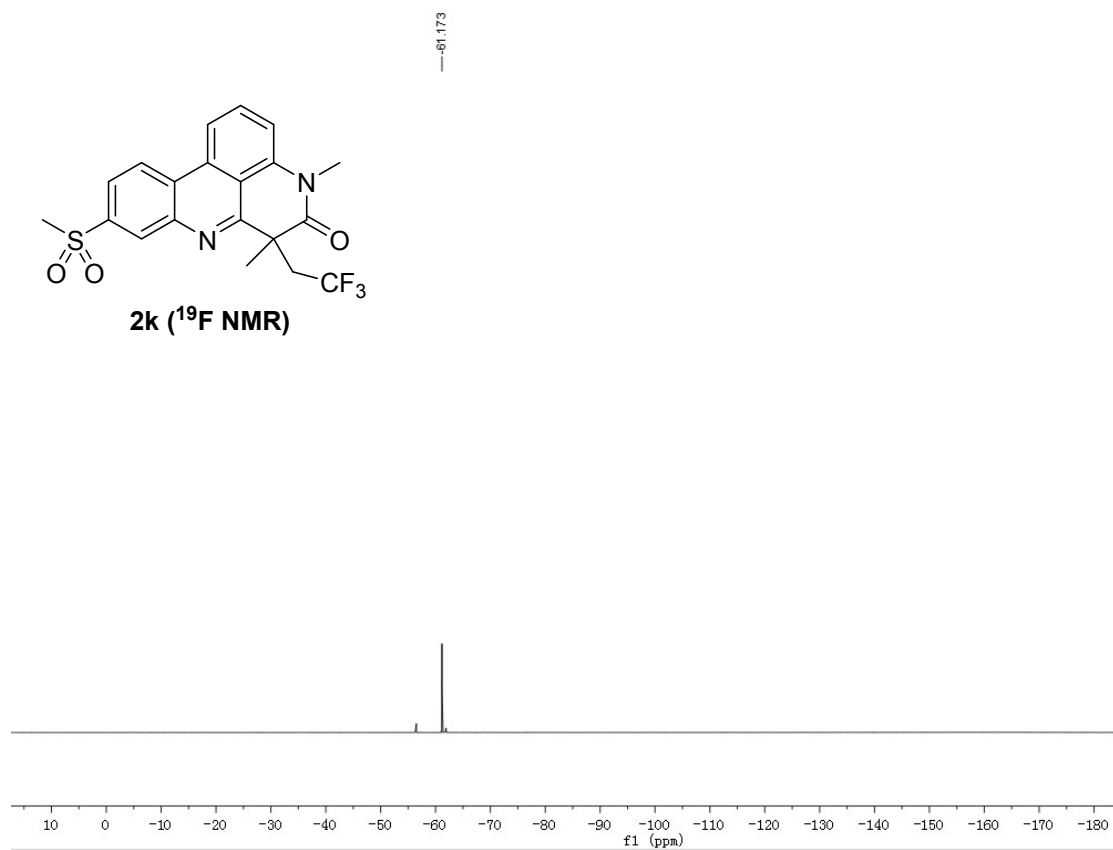

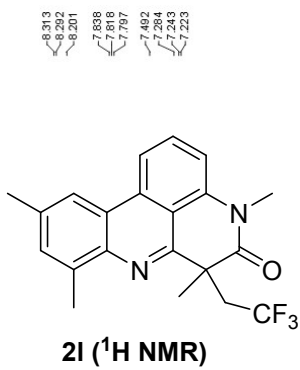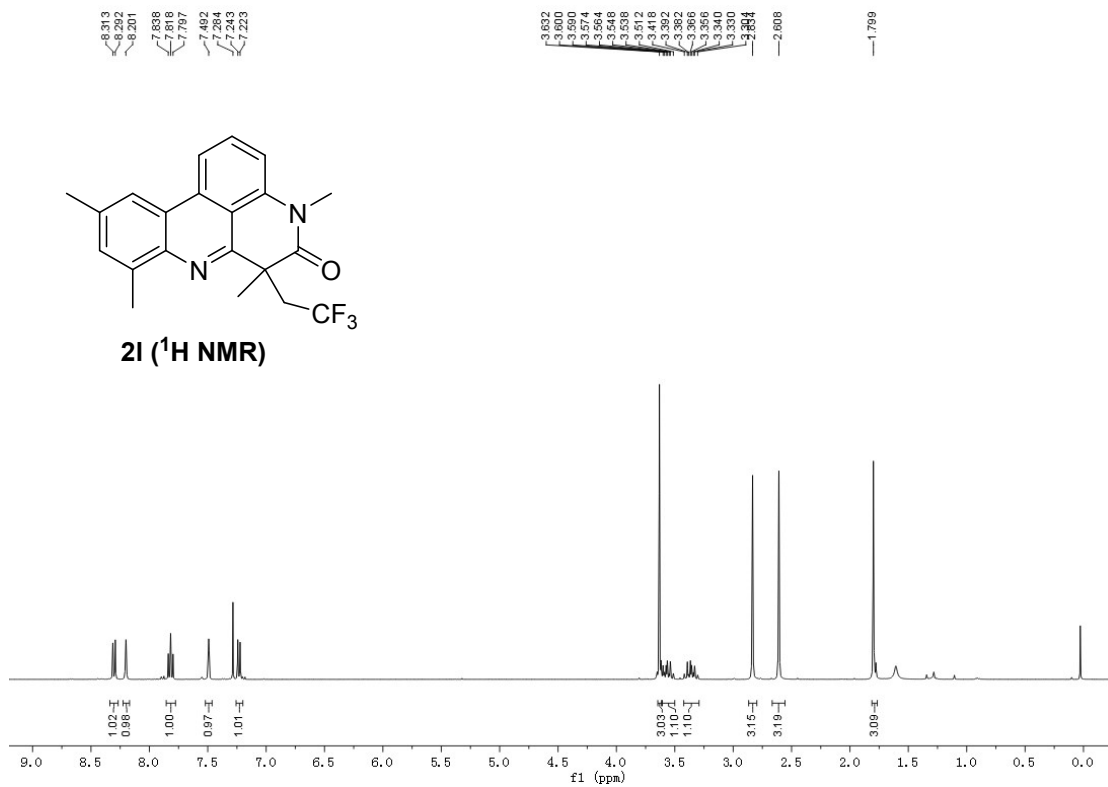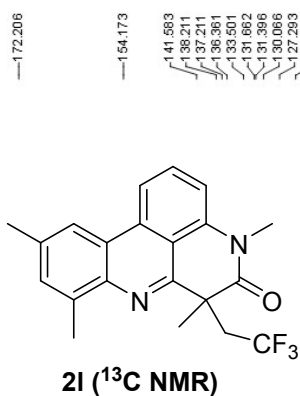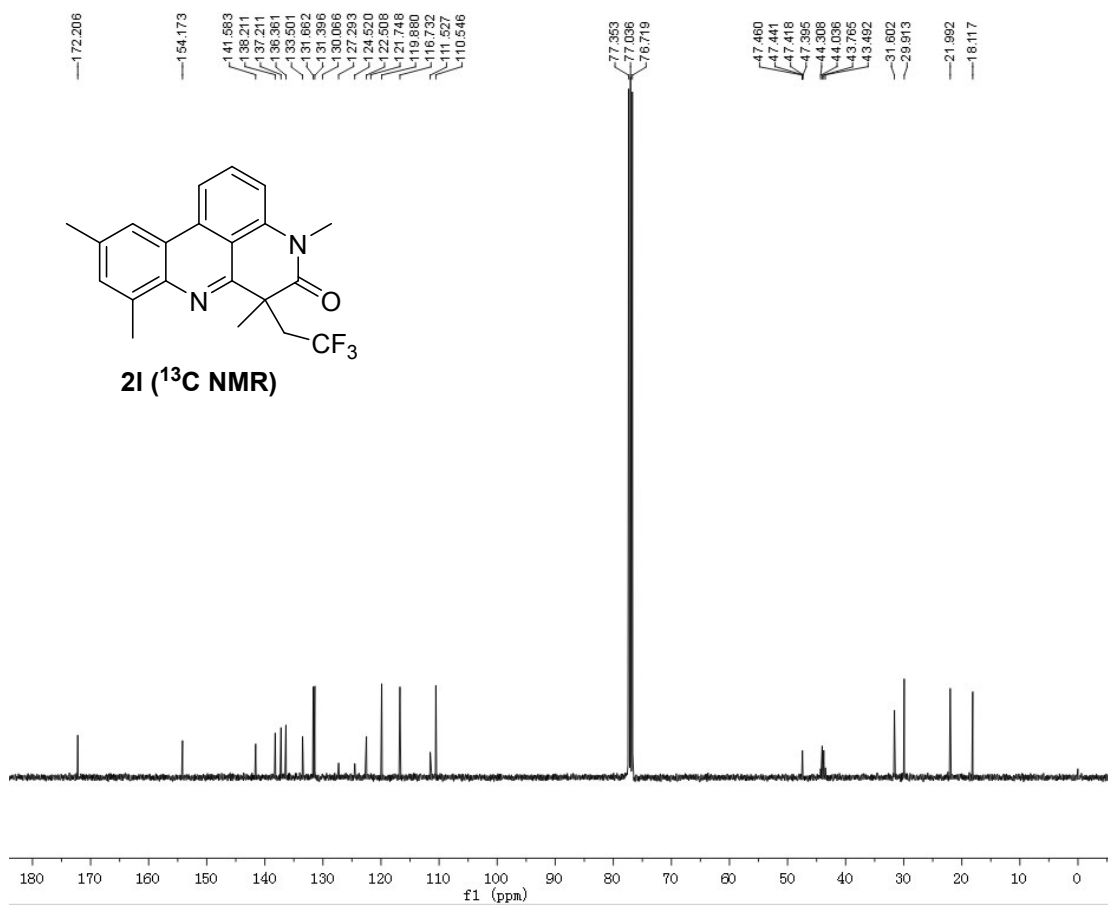

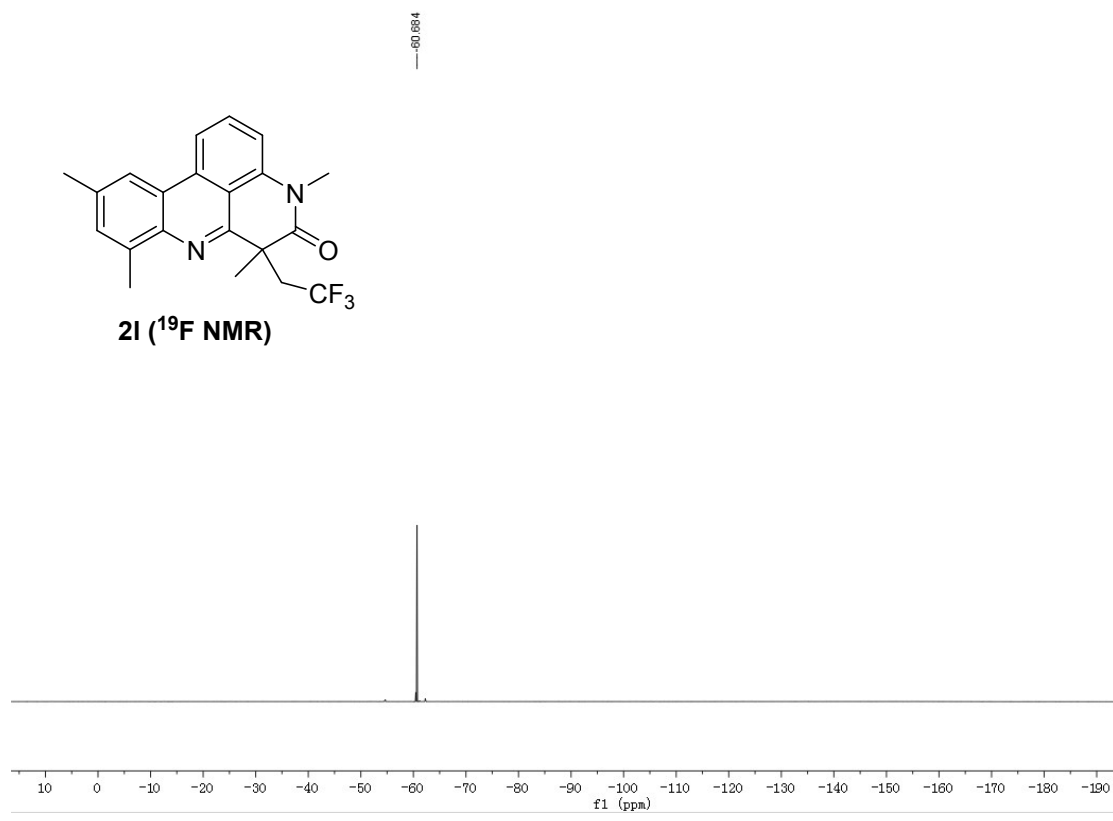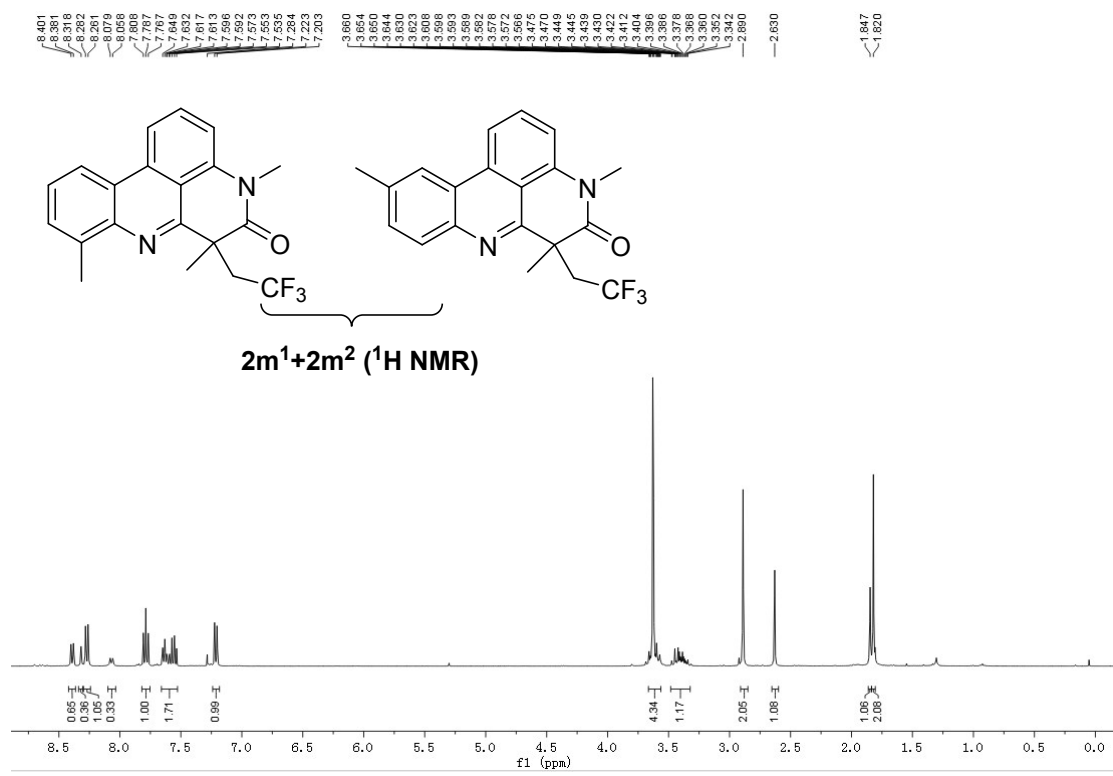

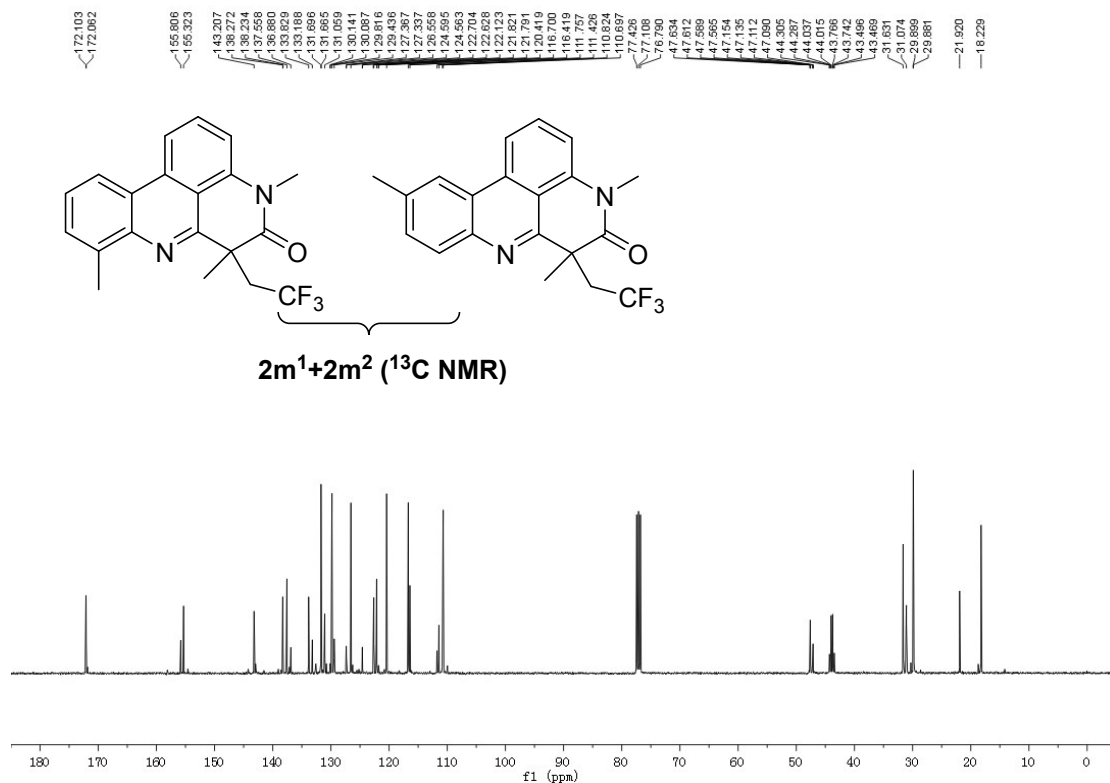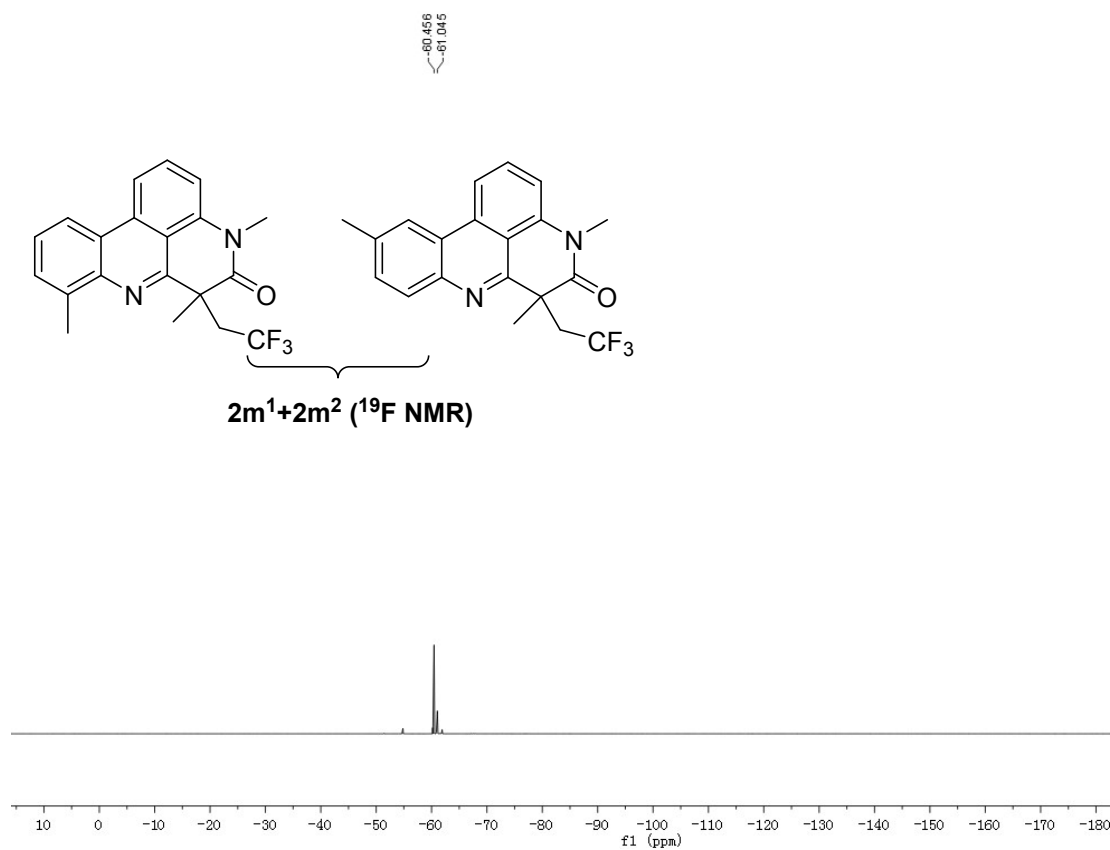

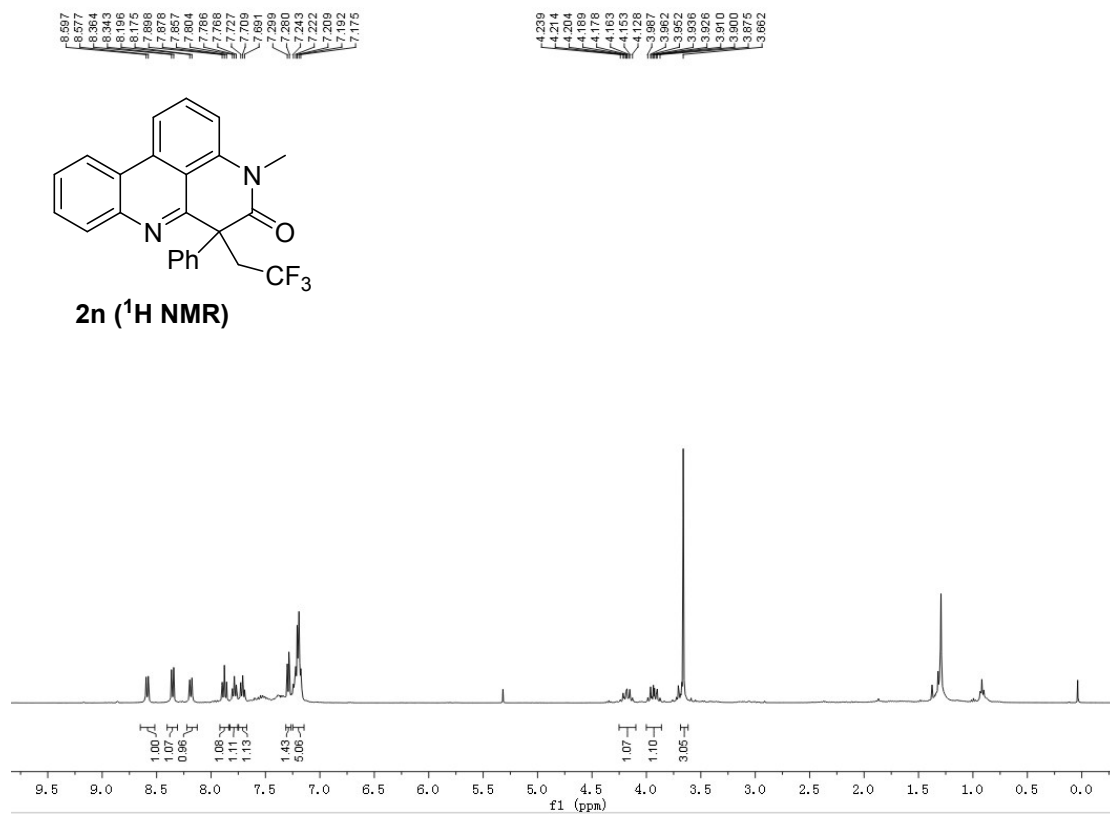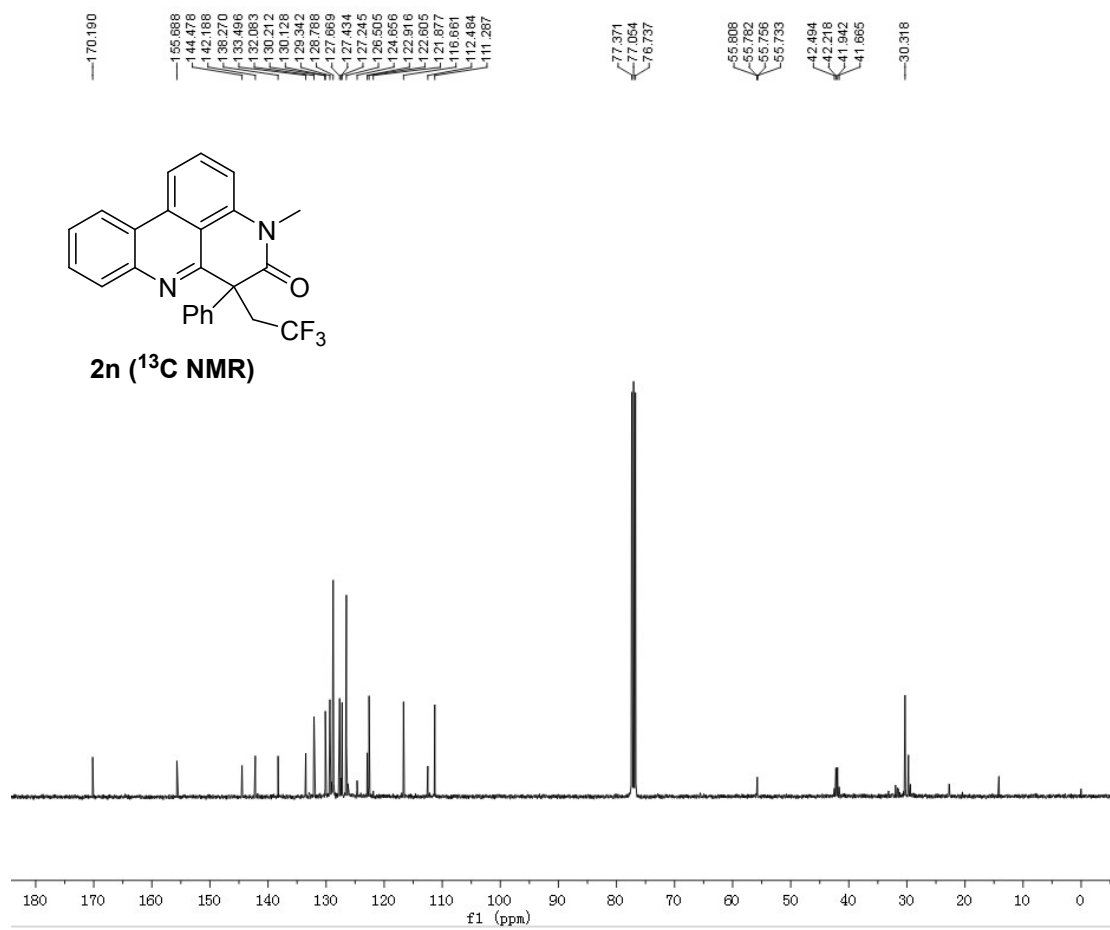

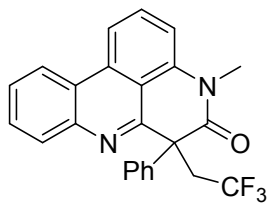

**2n** ( $^{19}\text{F}$  NMR)

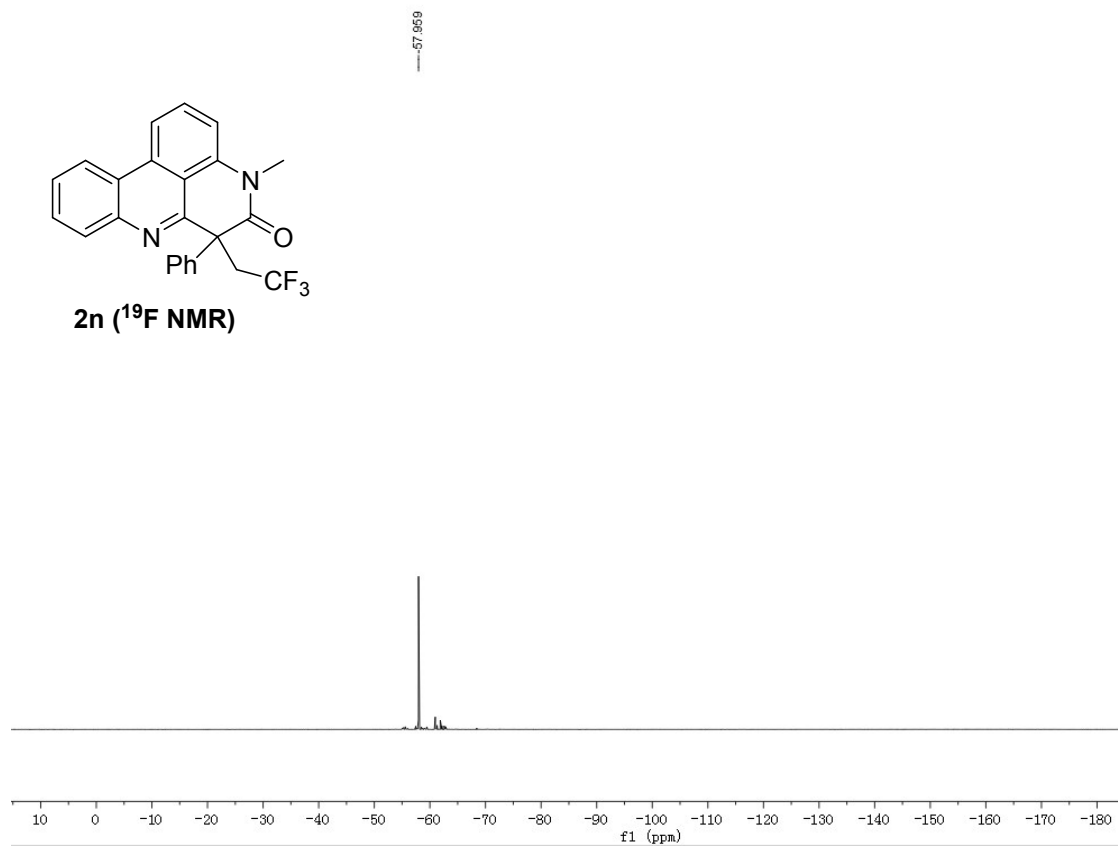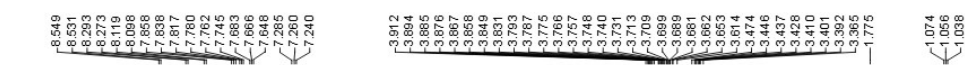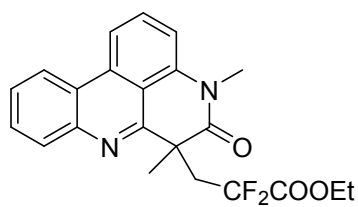

**3a** ( $^1\text{H}$  NMR)

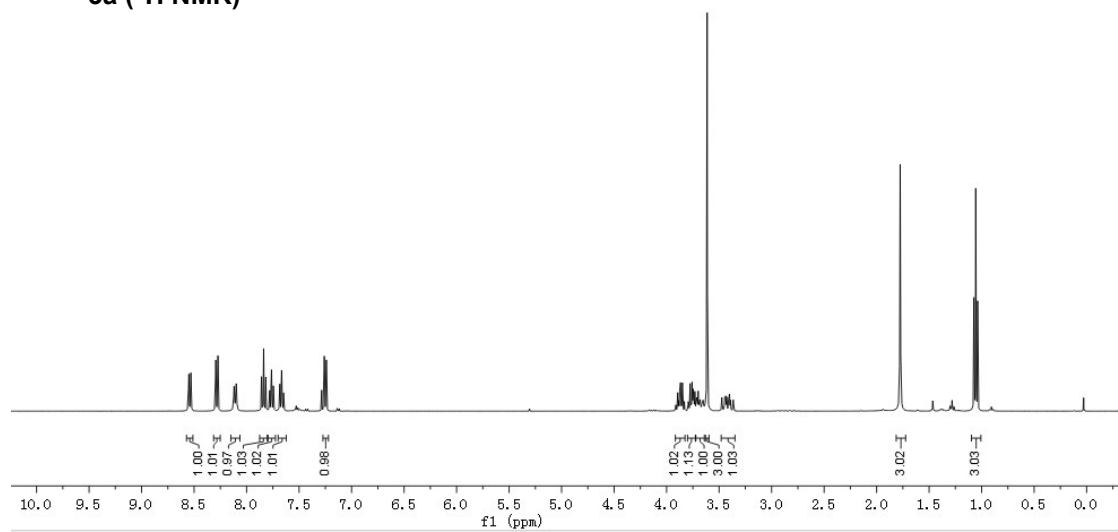



172.519  
 164.243  
 163.919  
 163.596  
 157.739  
 144.388  
 136.565  
 133.416  
 132.117  
 129.517  
 129.205  
 126.640  
 122.897  
 122.698  
 117.714  
 116.287  
 115.227  
 115.192  
 112.706  
 111.786  
 111.086

77.444  
 77.127  
 76.807  
 62.889  
 47.791  
 47.762  
 47.743  
 47.712  
 44.046  
 43.625  
 43.605  
 43.564  
 31.703  
 29.948  
 13.574

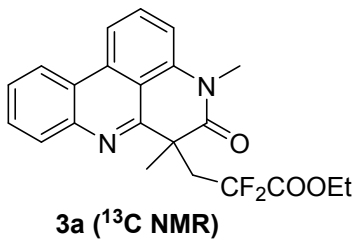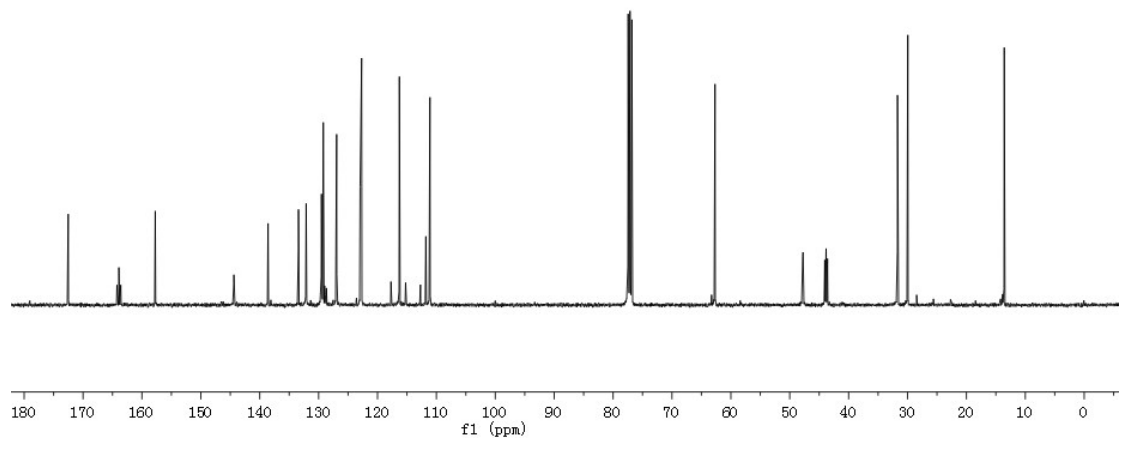

97.663  
 98.361  
 100.777  
 104.475

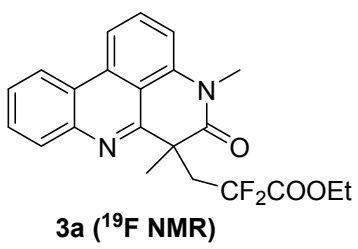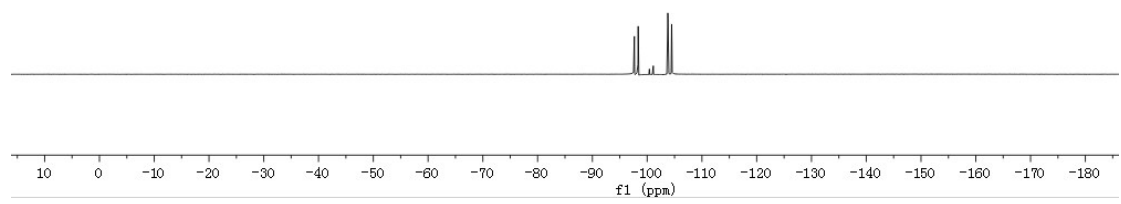

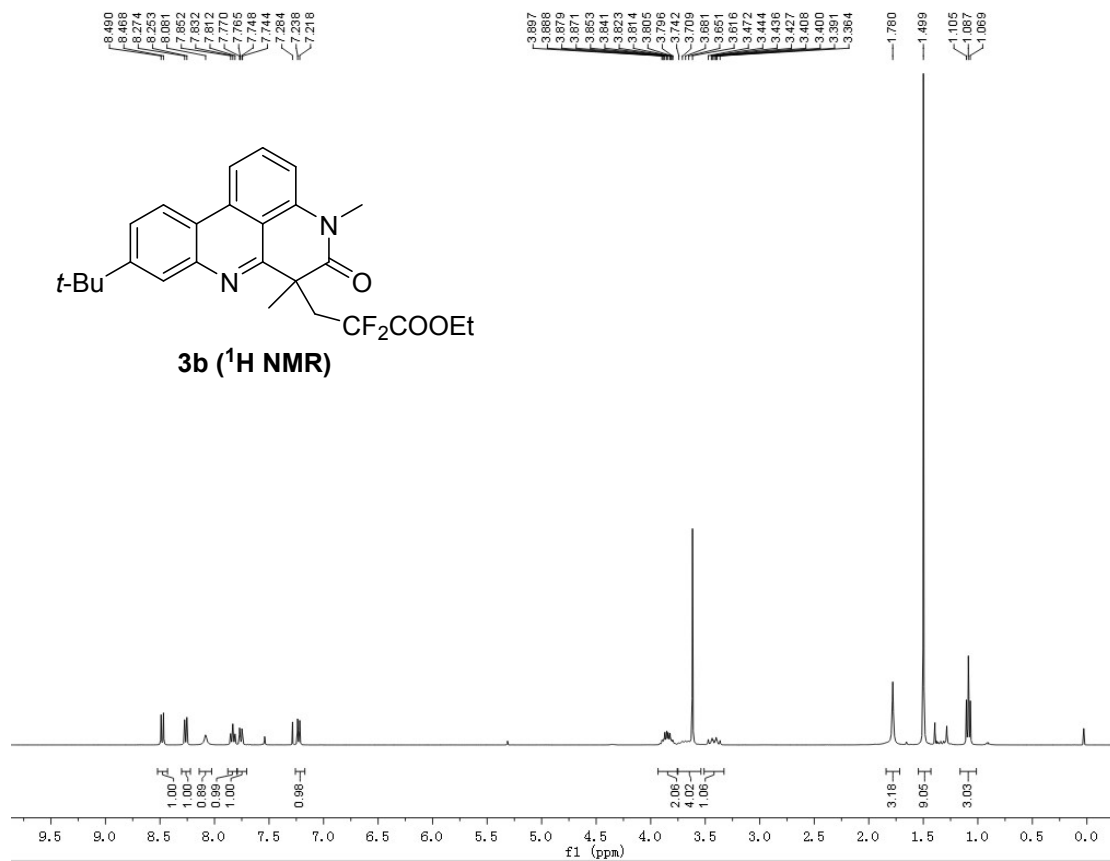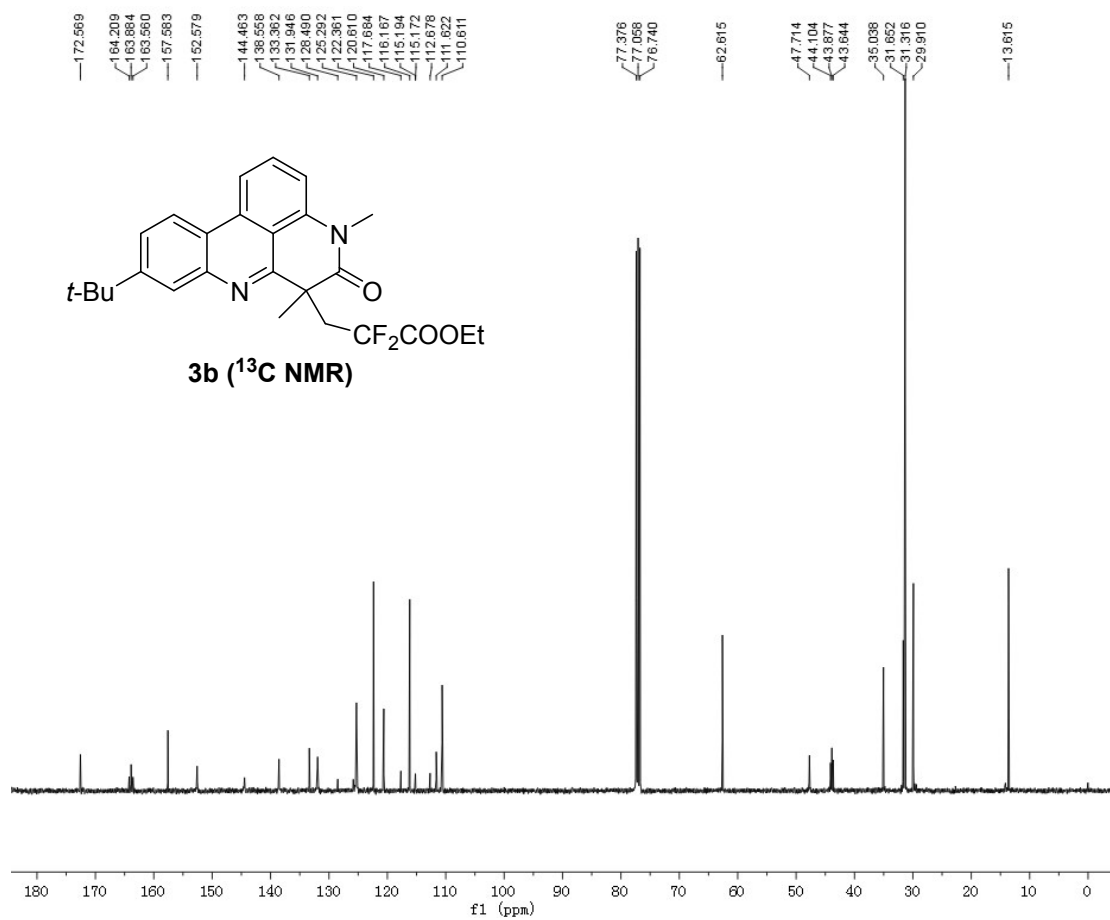



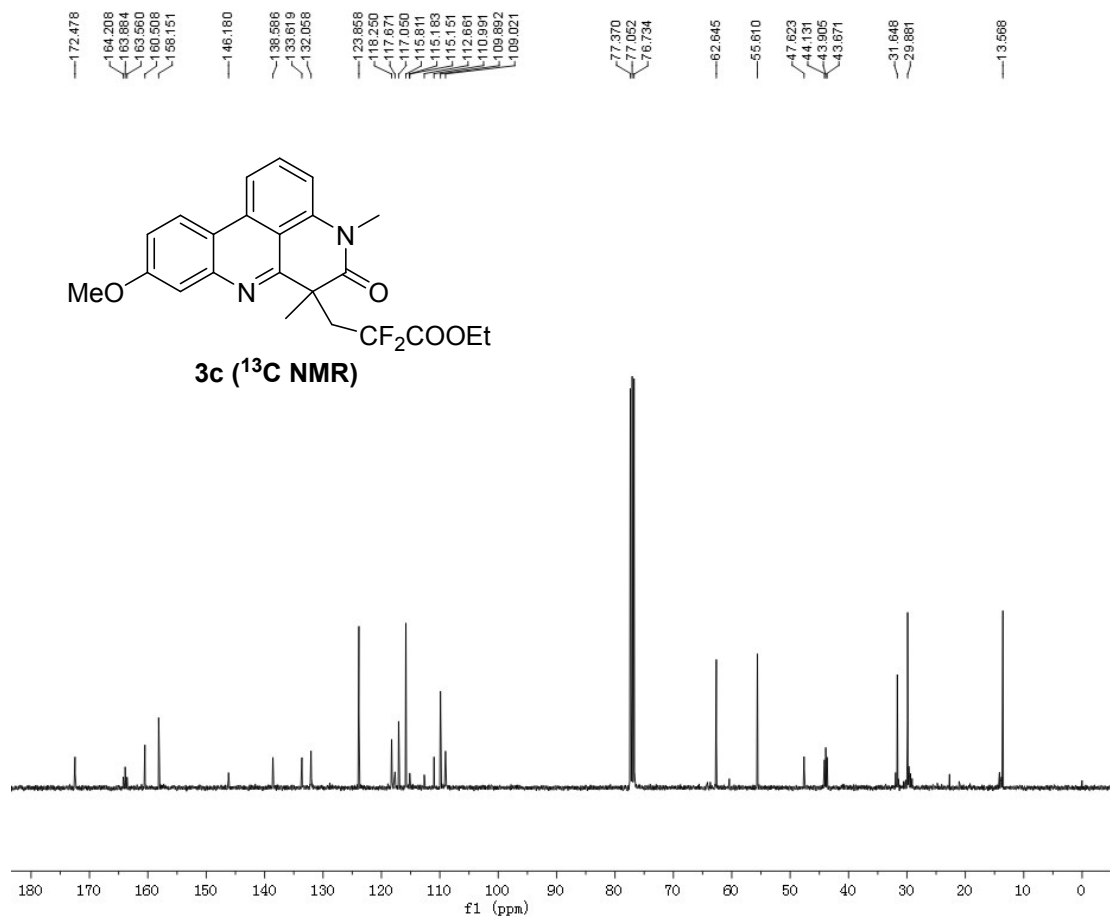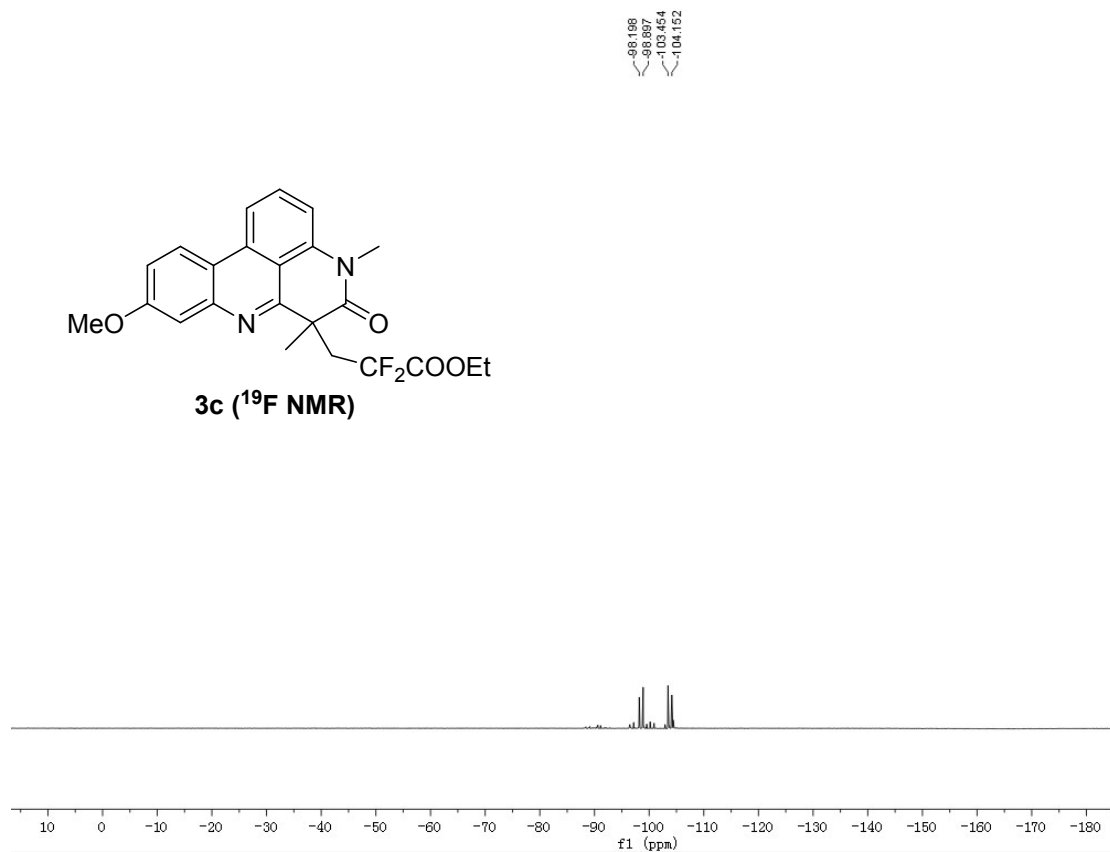

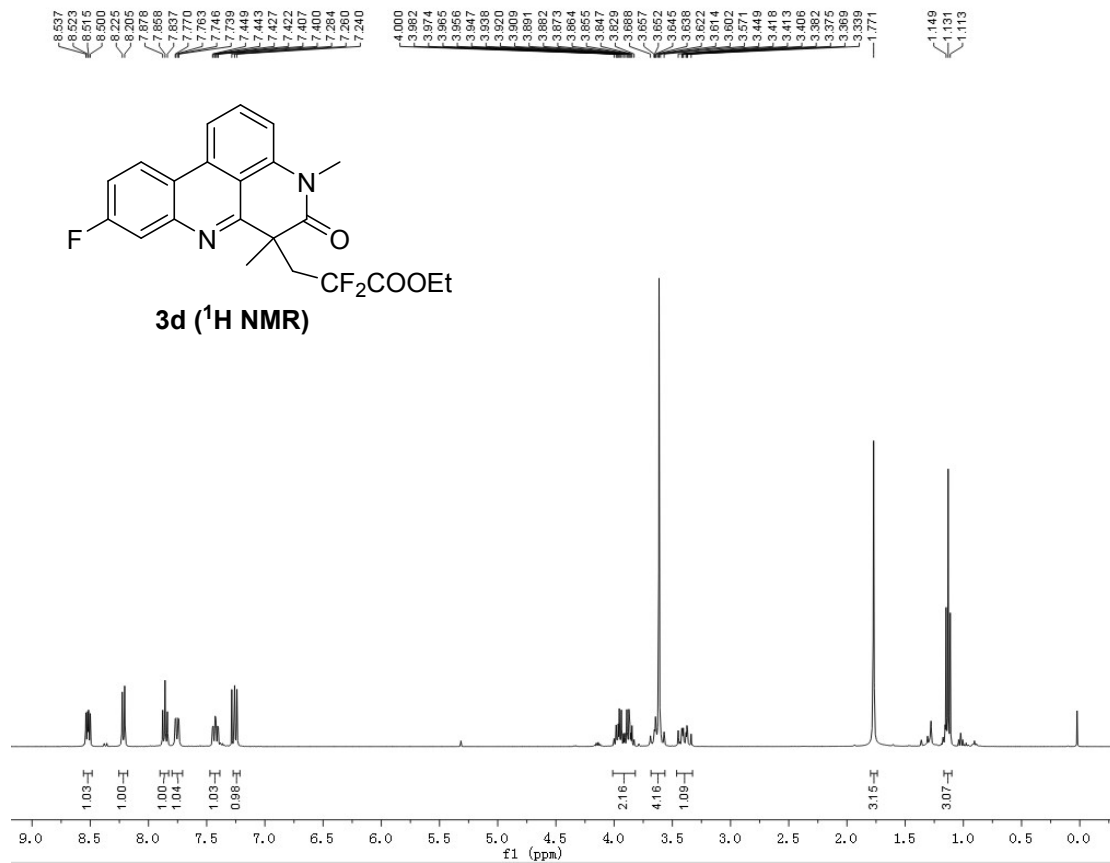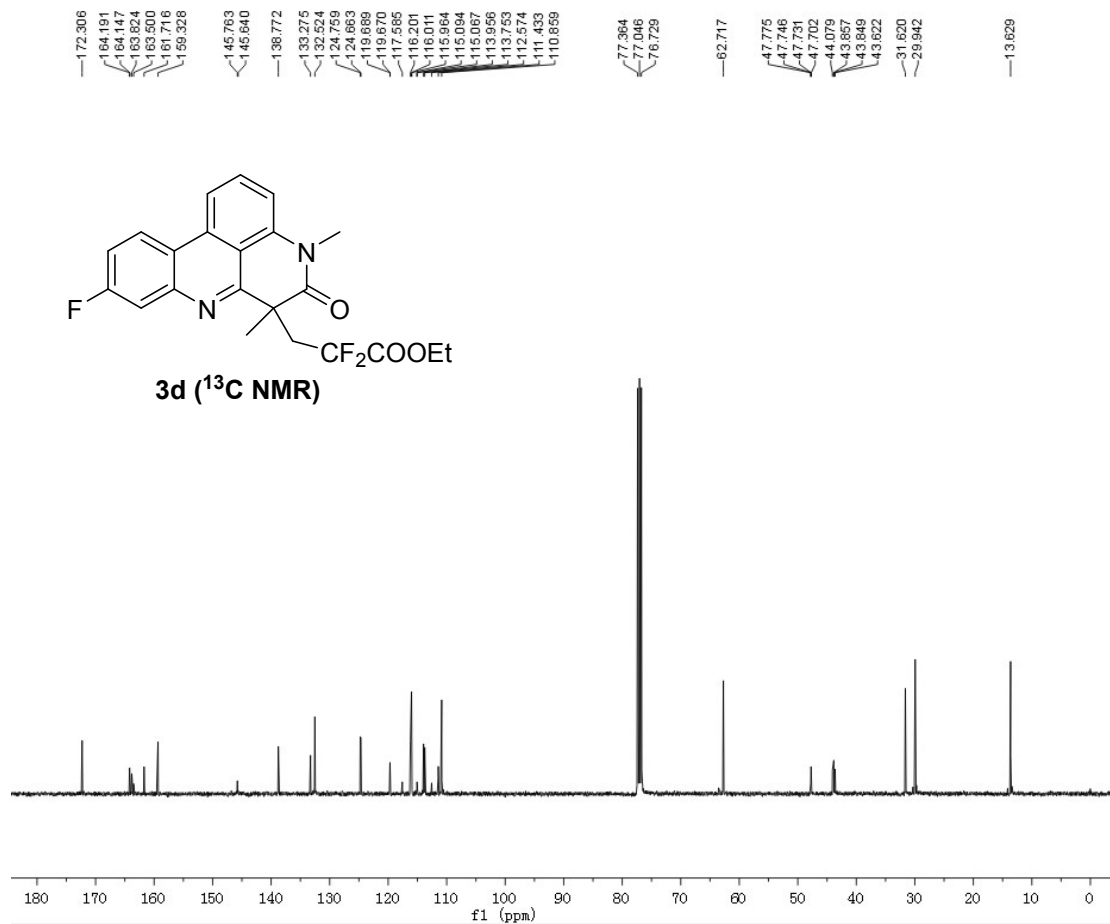

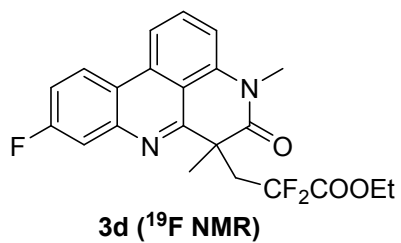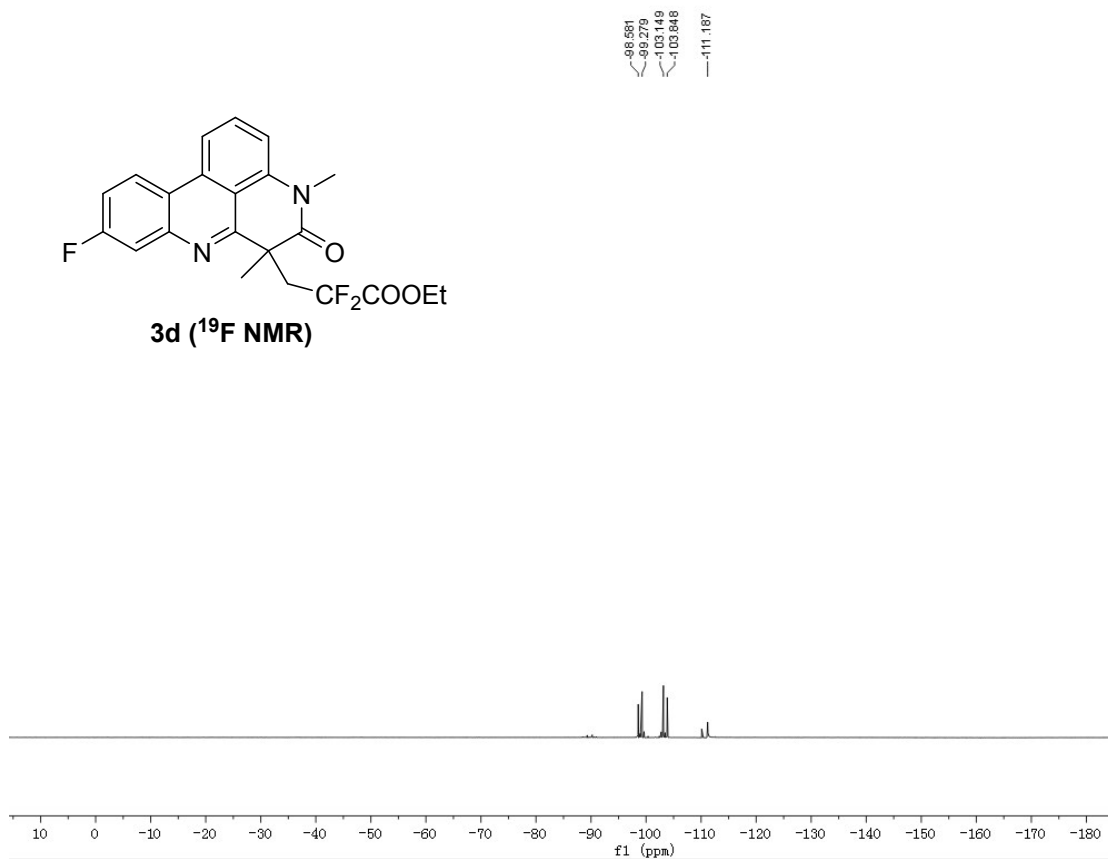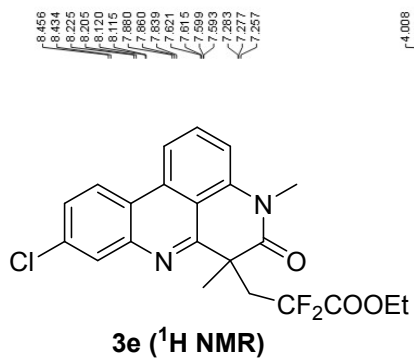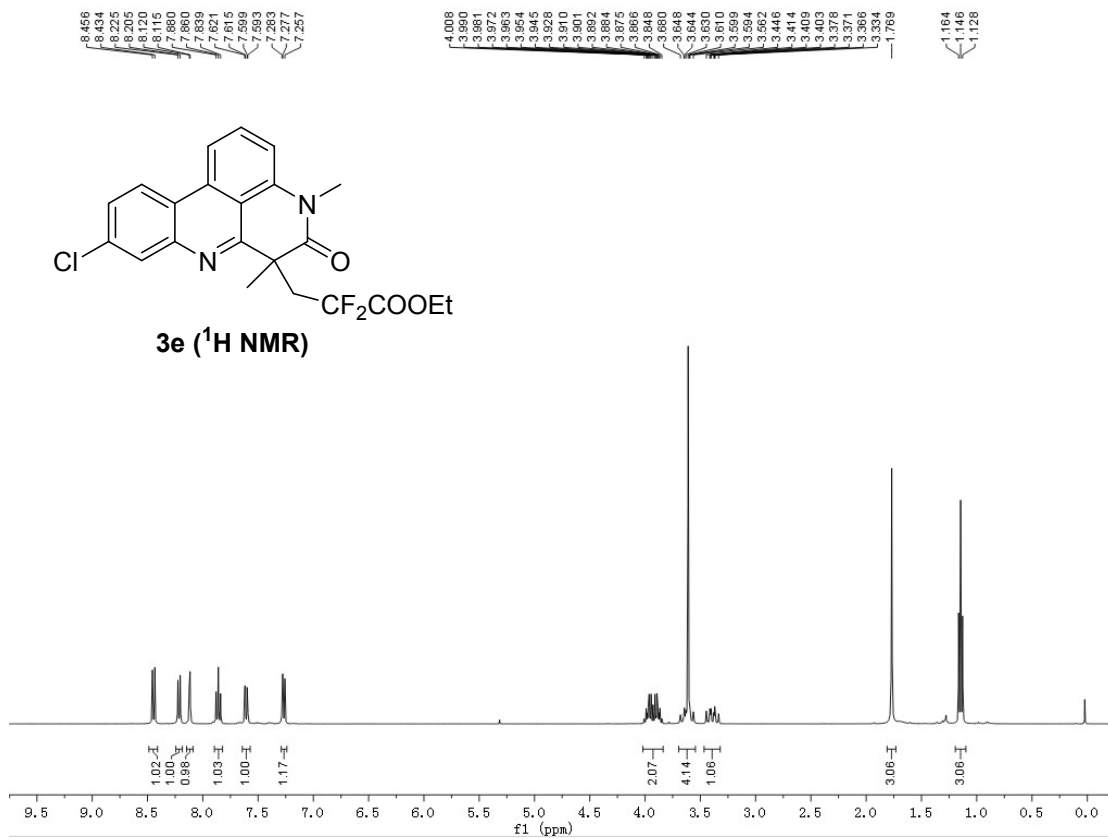

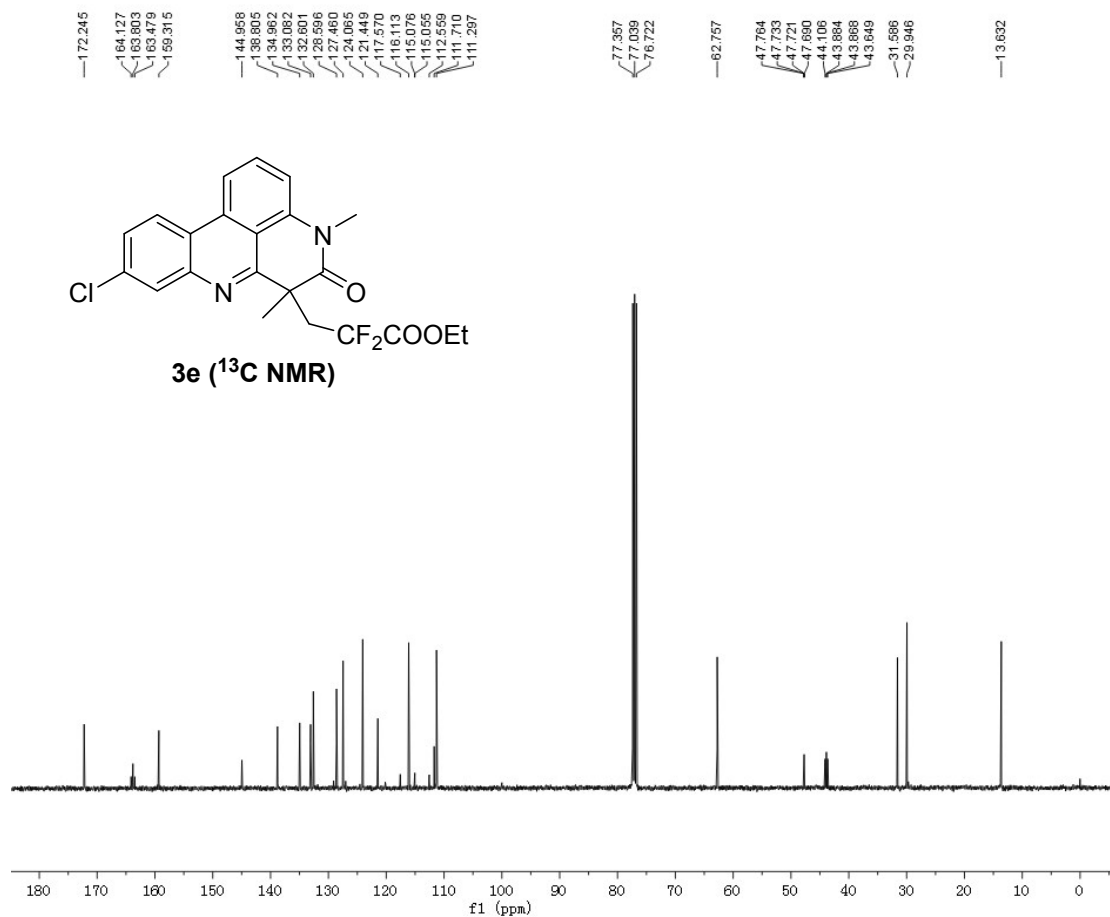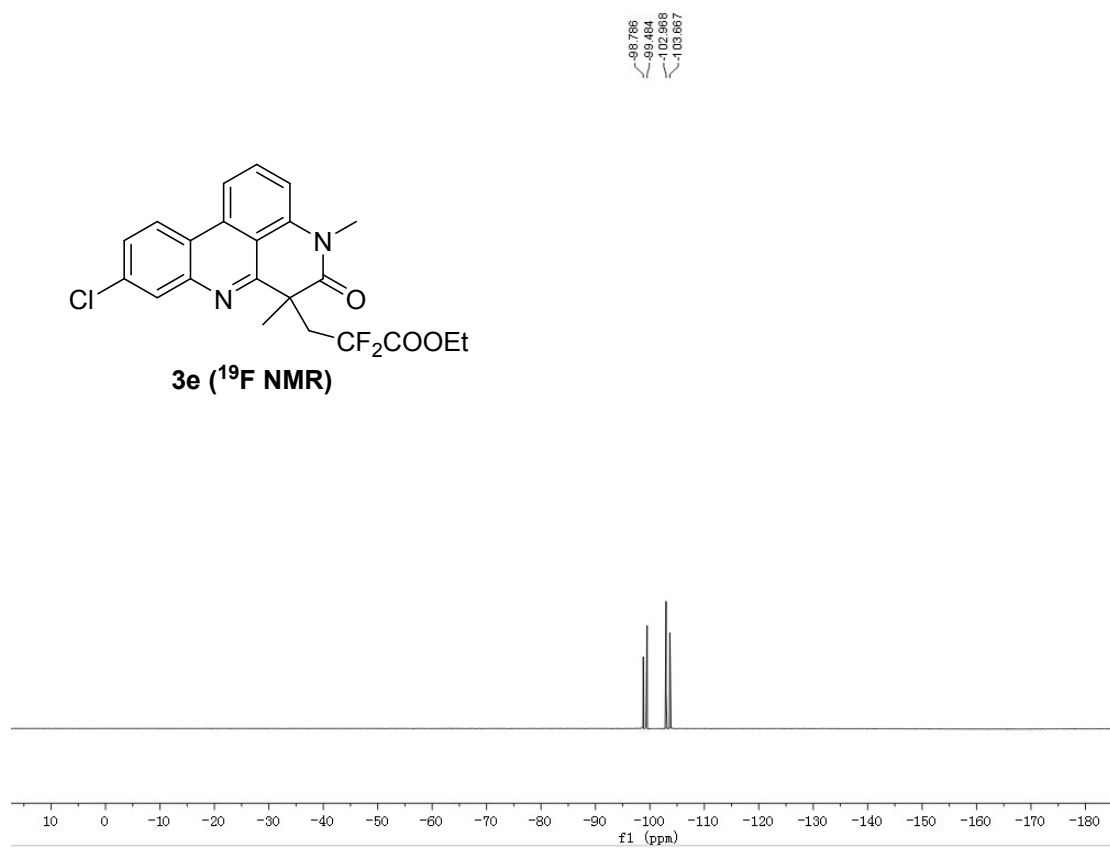

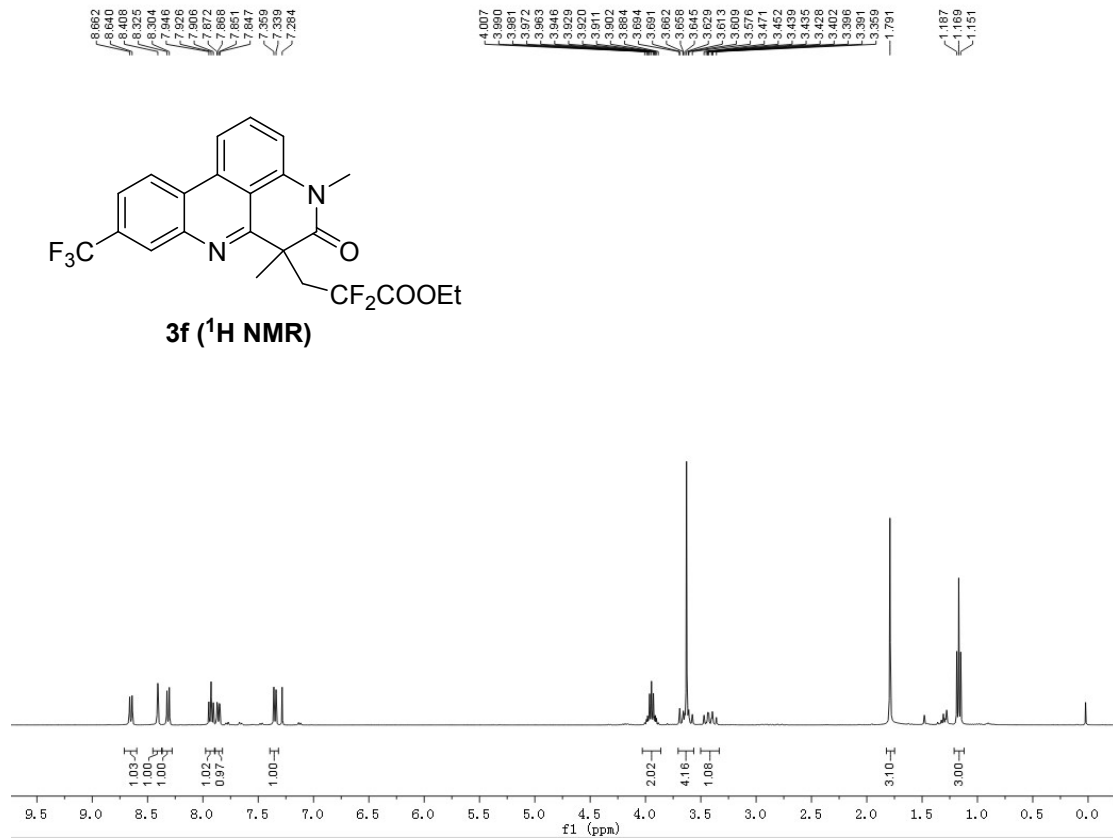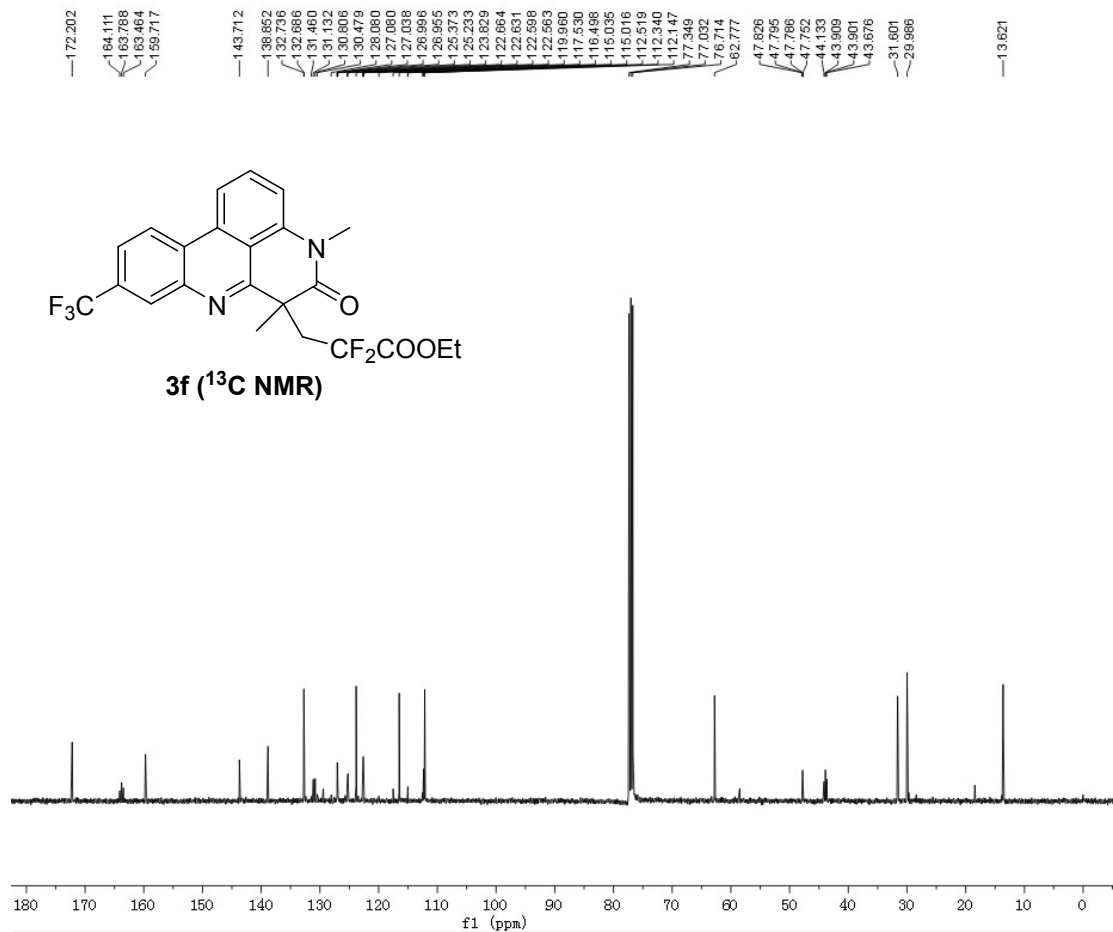



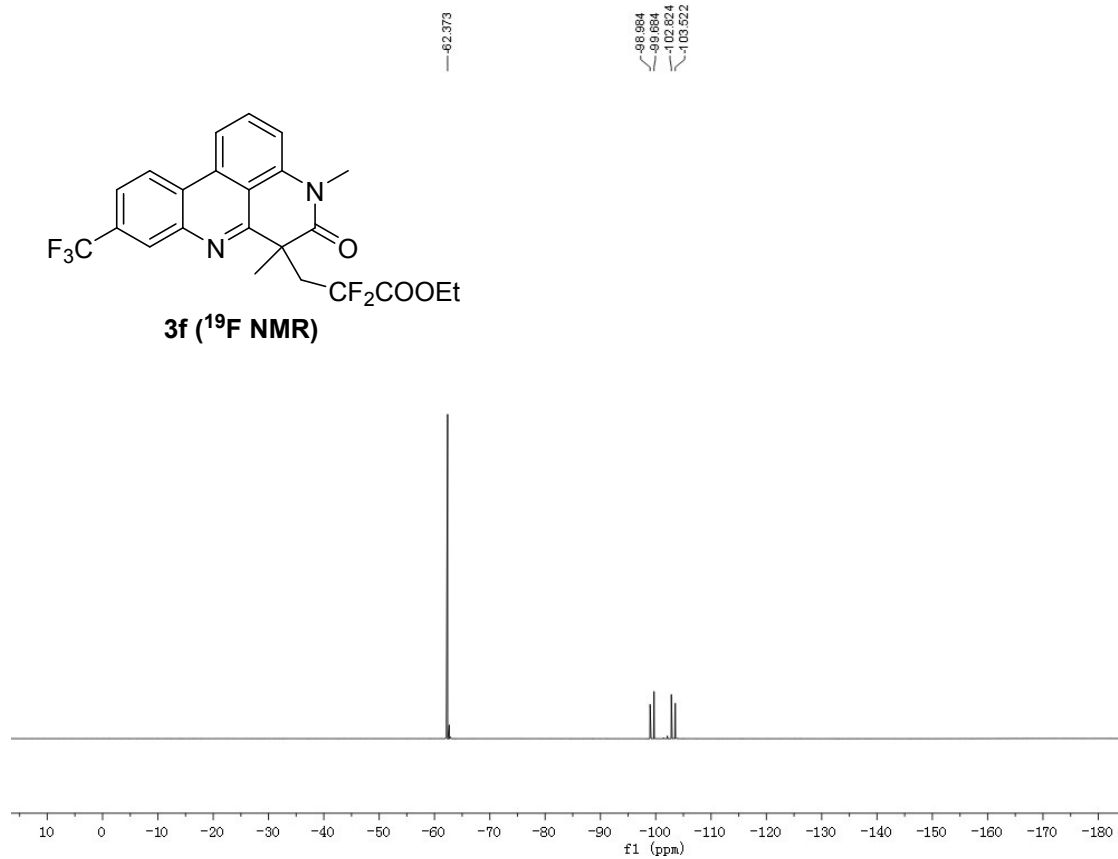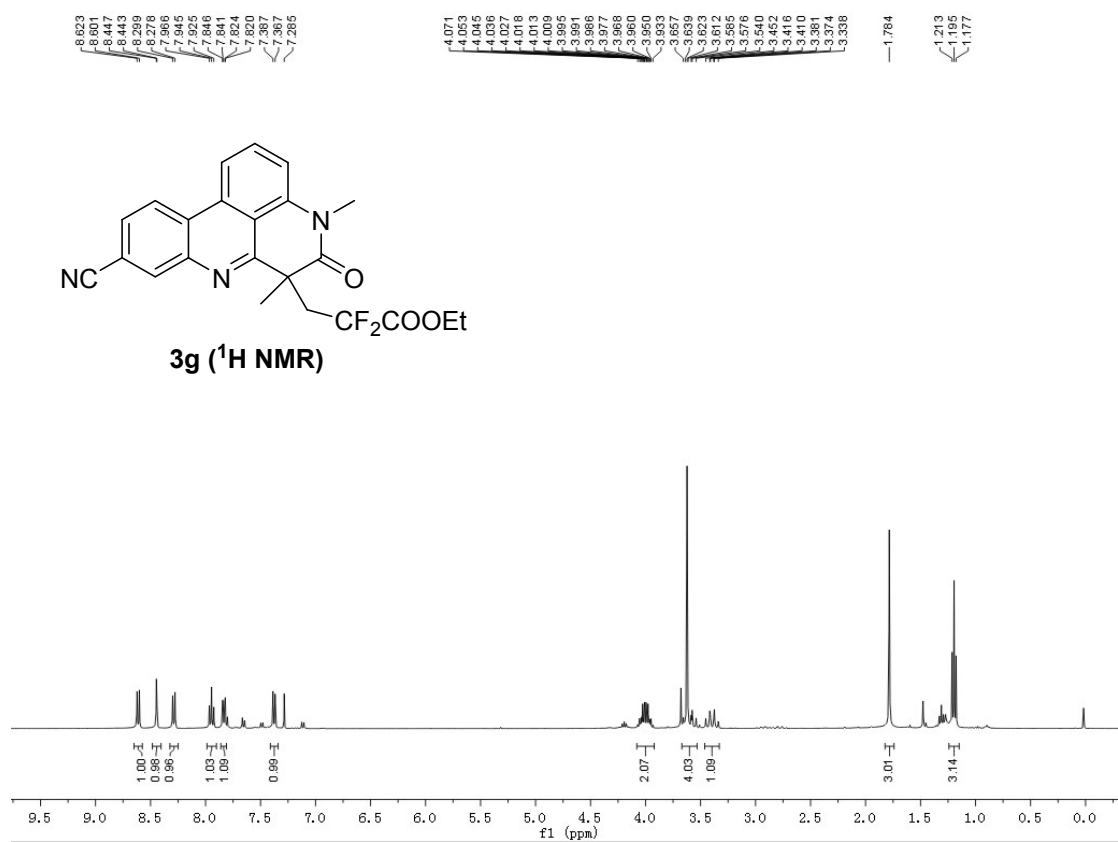

172.046  
 164.055  
 163.731  
 163.407  
 160.433  
 143.860  
 138.961  
 134.538  
 133.024  
 132.398  
 129.815  
 128.175  
 126.149  
 124.120  
 118.495  
 117.488  
 116.590  
 114.988  
 114.974  
 112.781  
 112.704  
 112.493

77.388  
 77.050  
 76.733  
 62.838  
 47.827  
 47.793  
 47.757  
 44.163  
 43.934  
 43.708  
 31.584  
 30.012  
 13.721

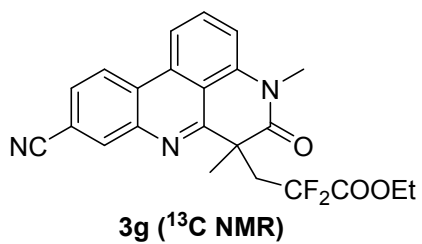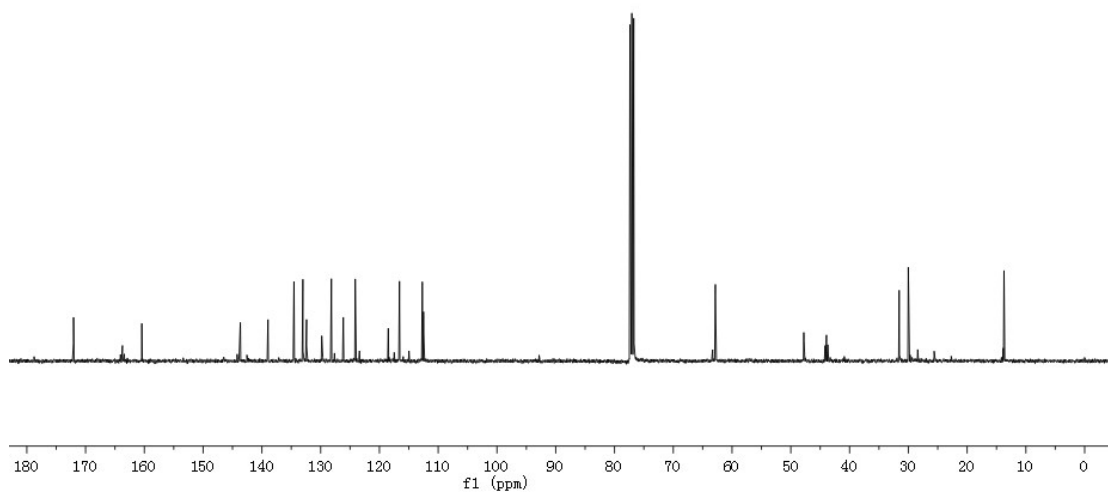

99.709  
 100.408  
 102.172  
 102.871

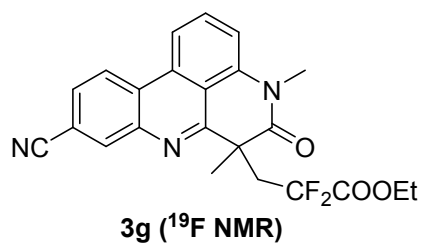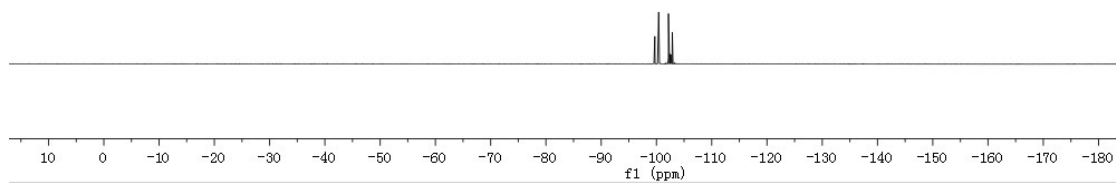

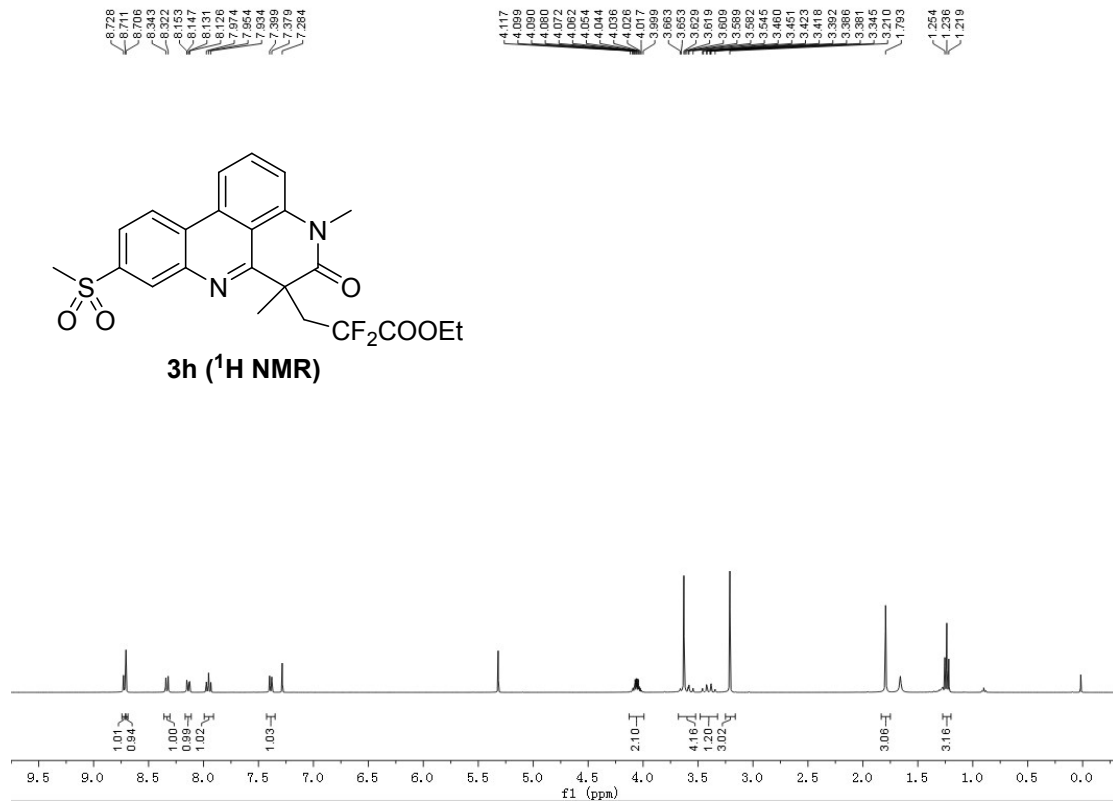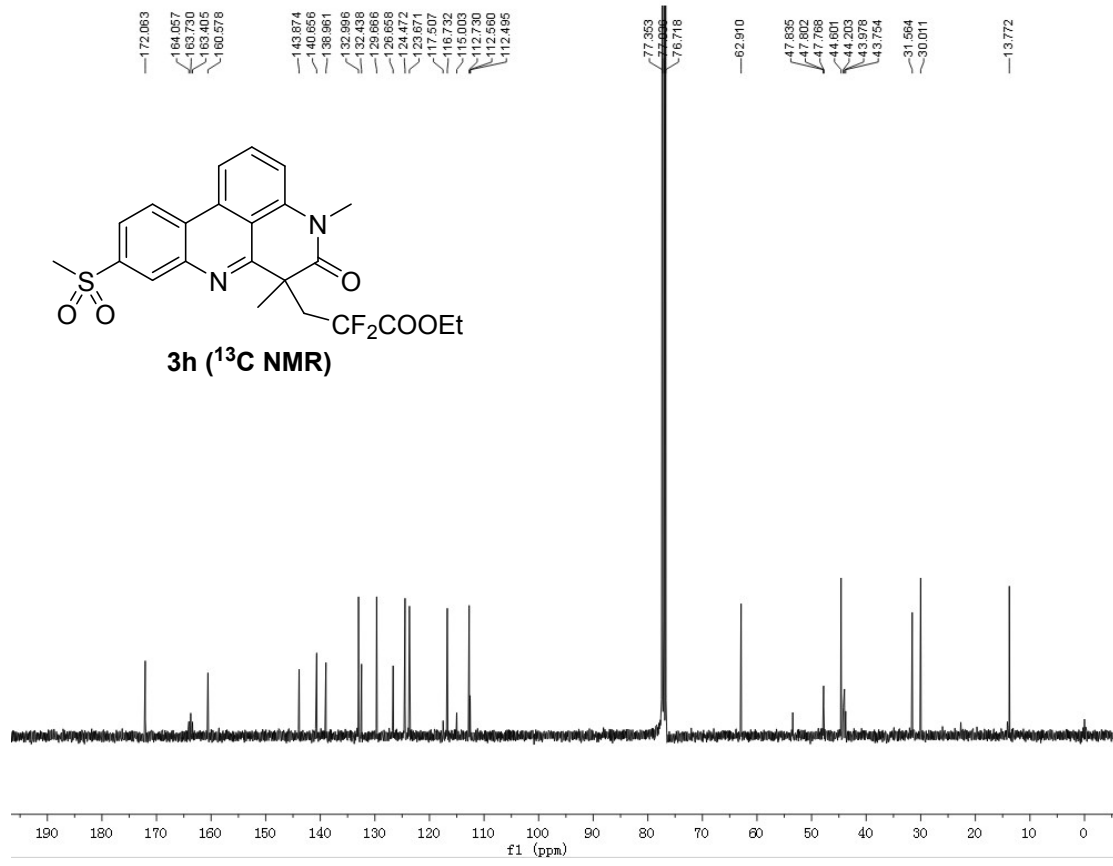

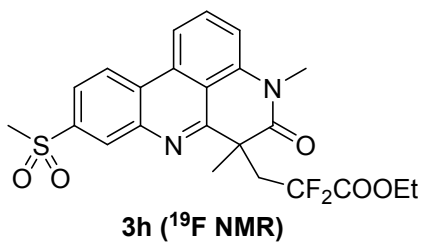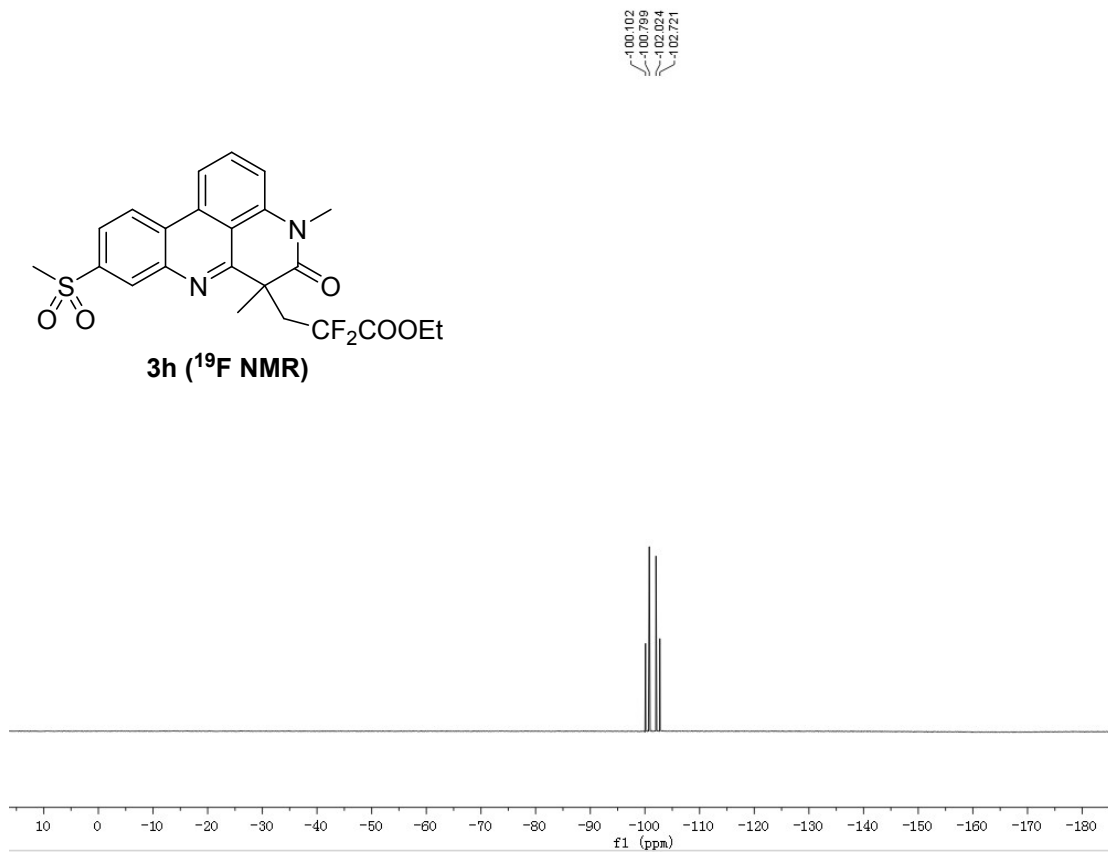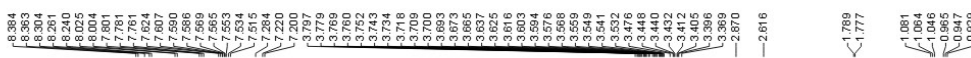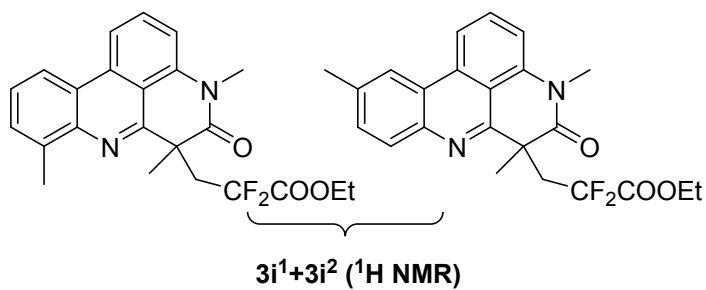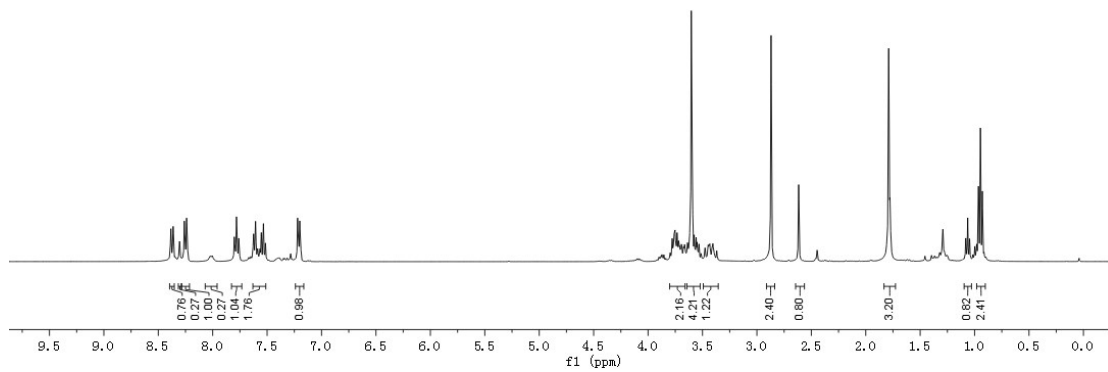

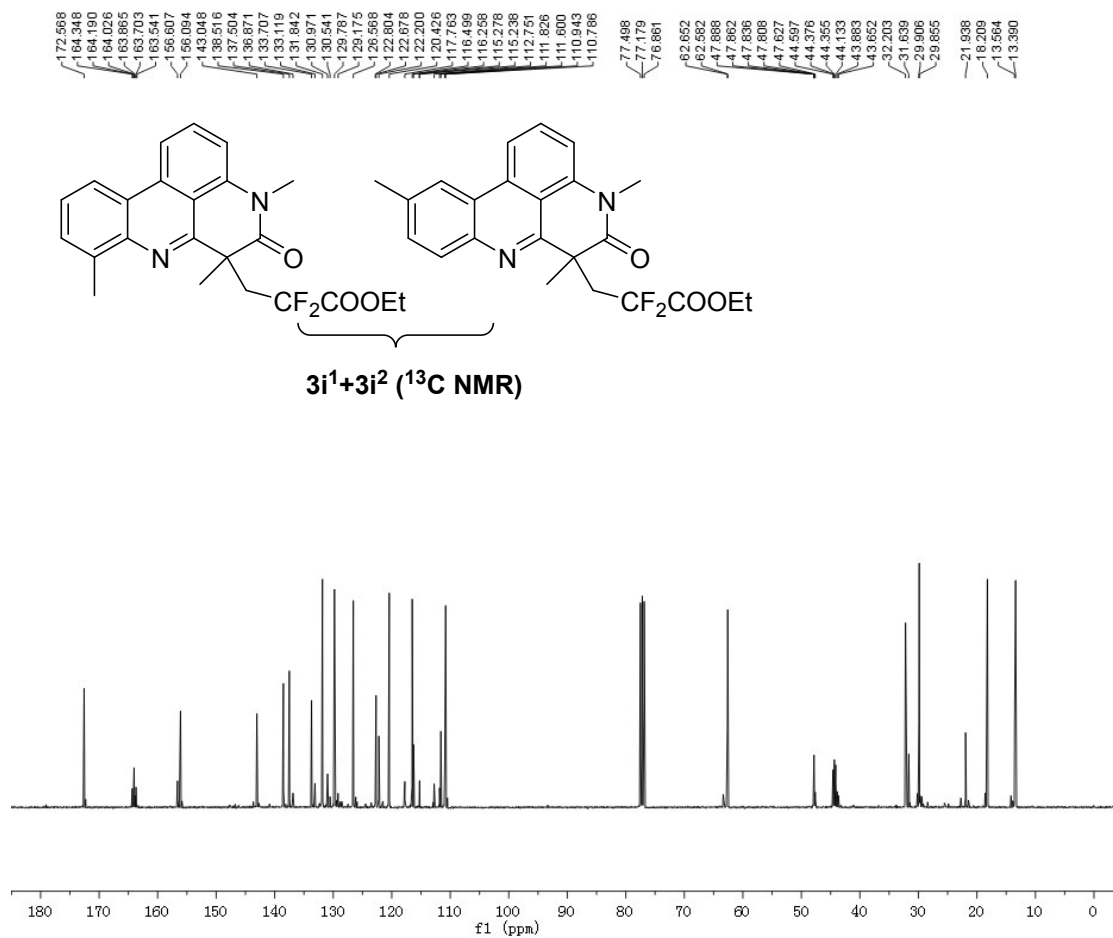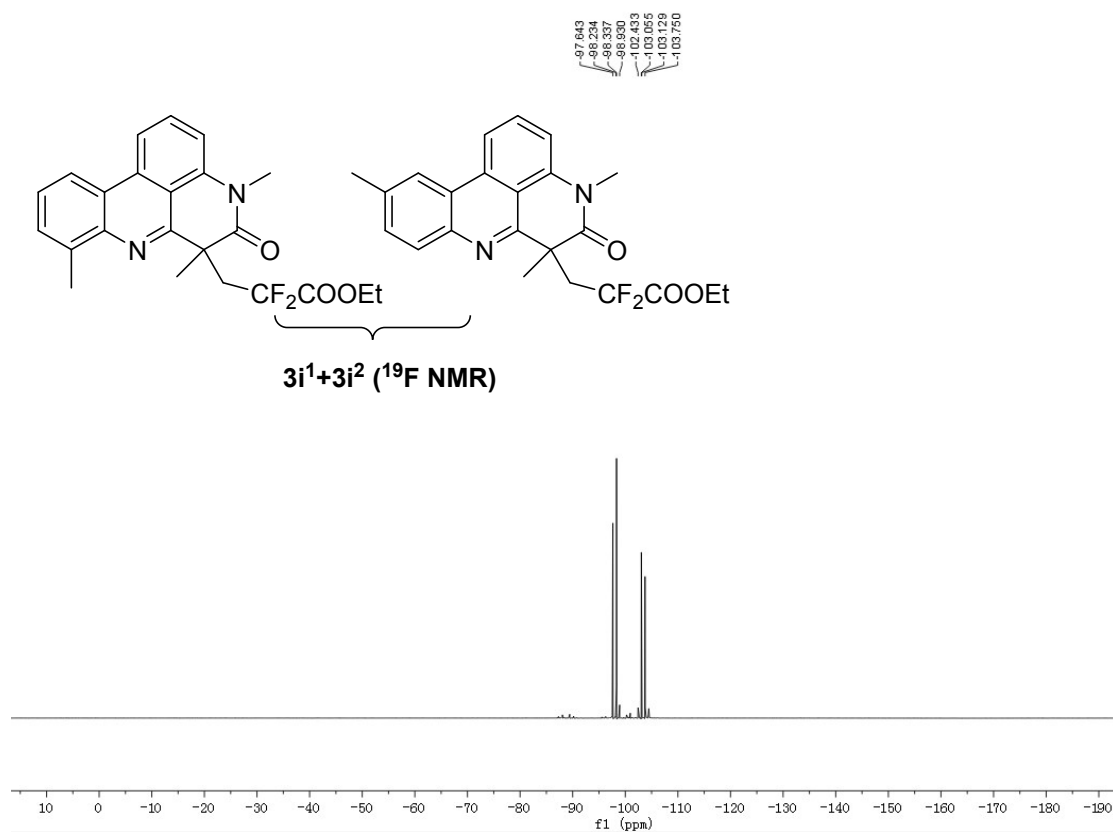

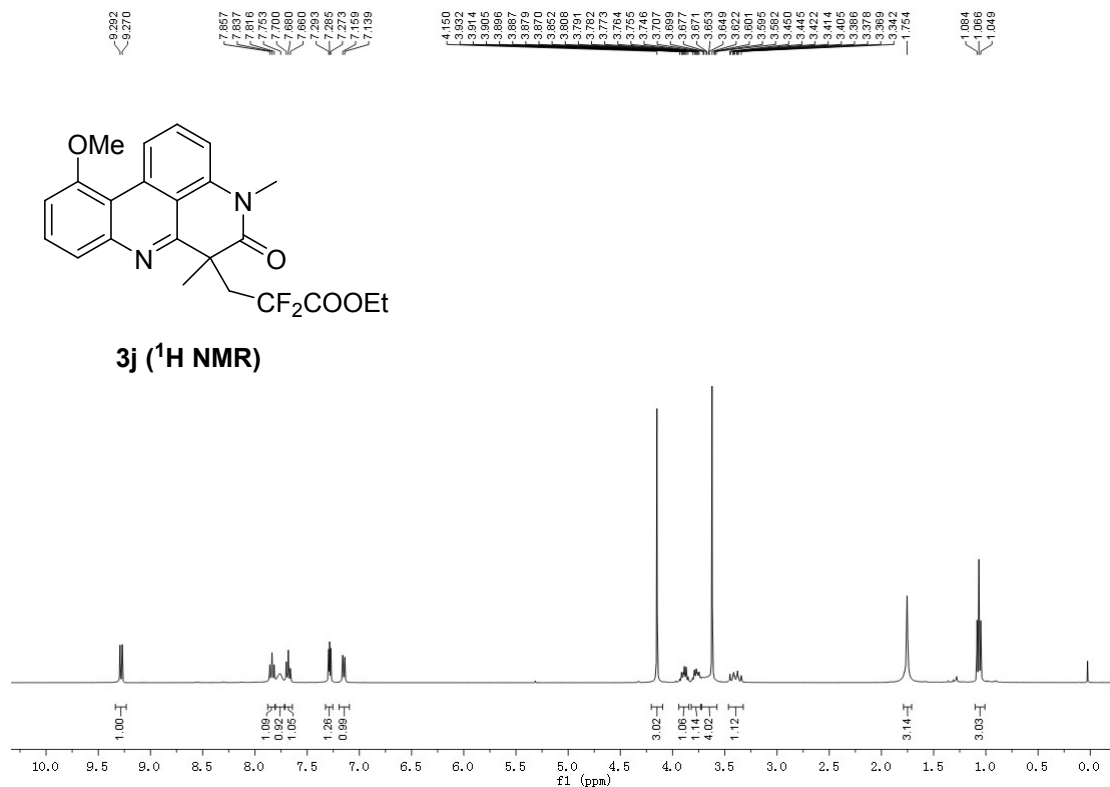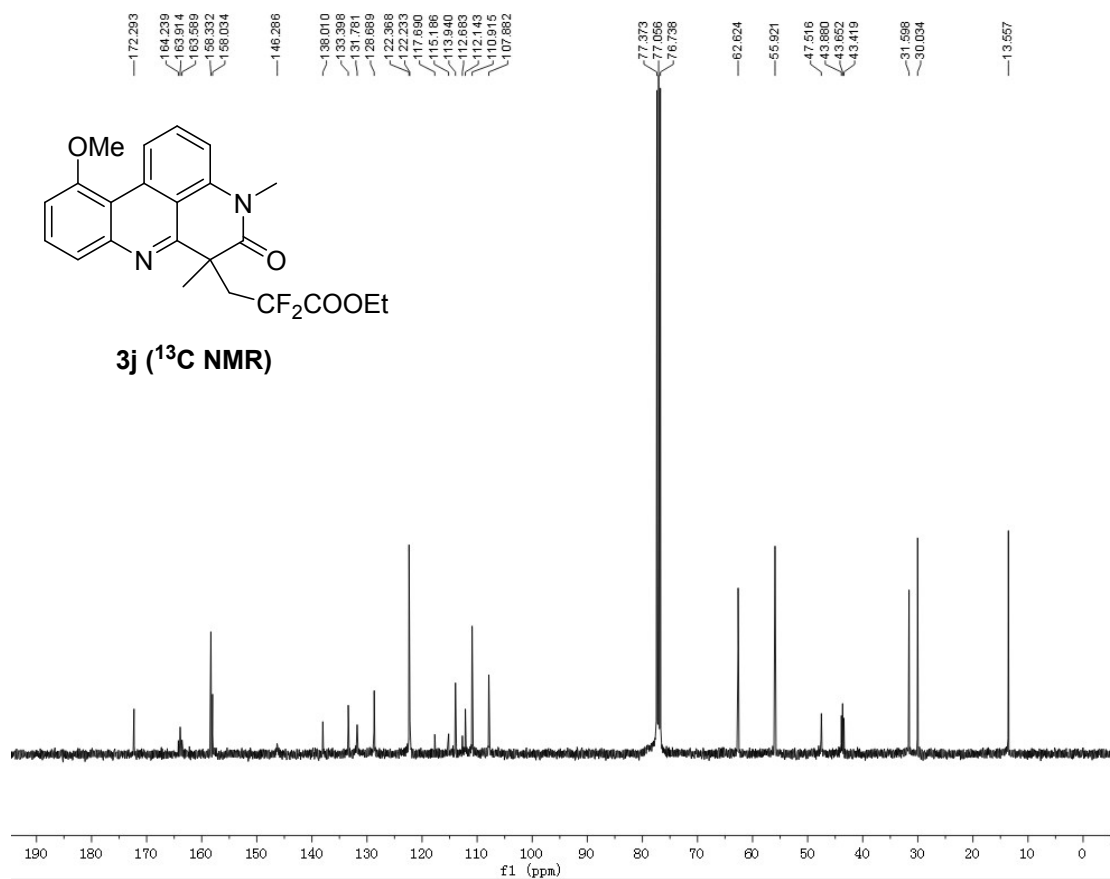

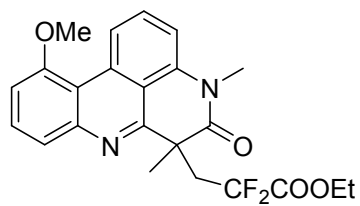

3j (<sup>19</sup>F NMR)

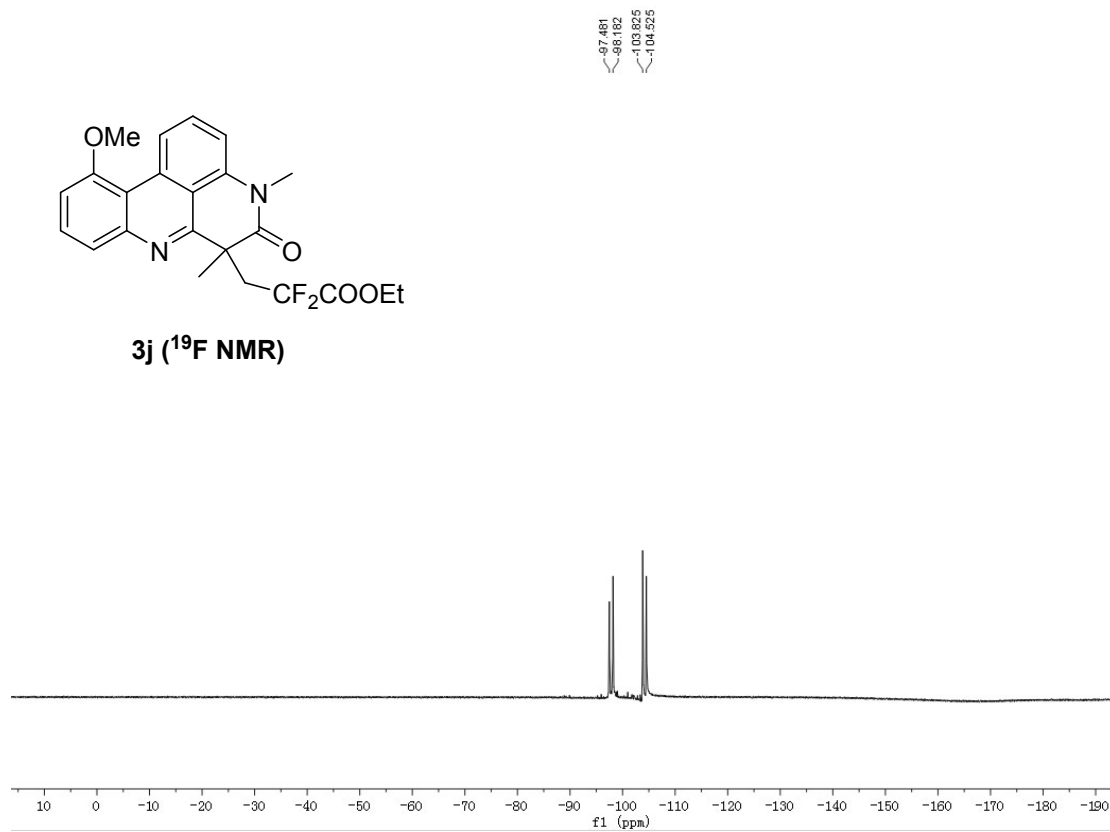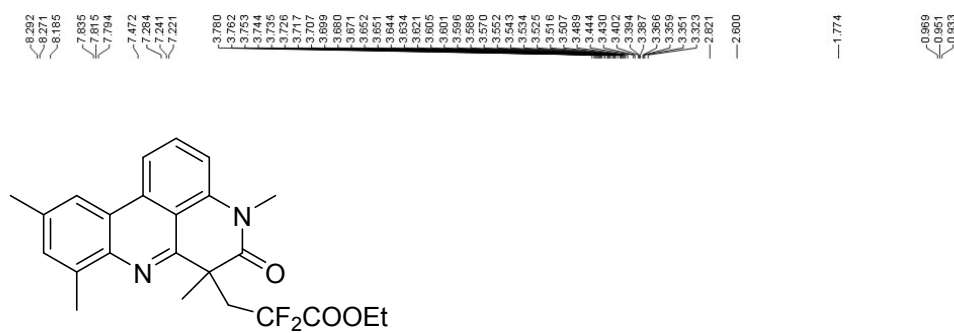

3k (<sup>1</sup>H NMR)

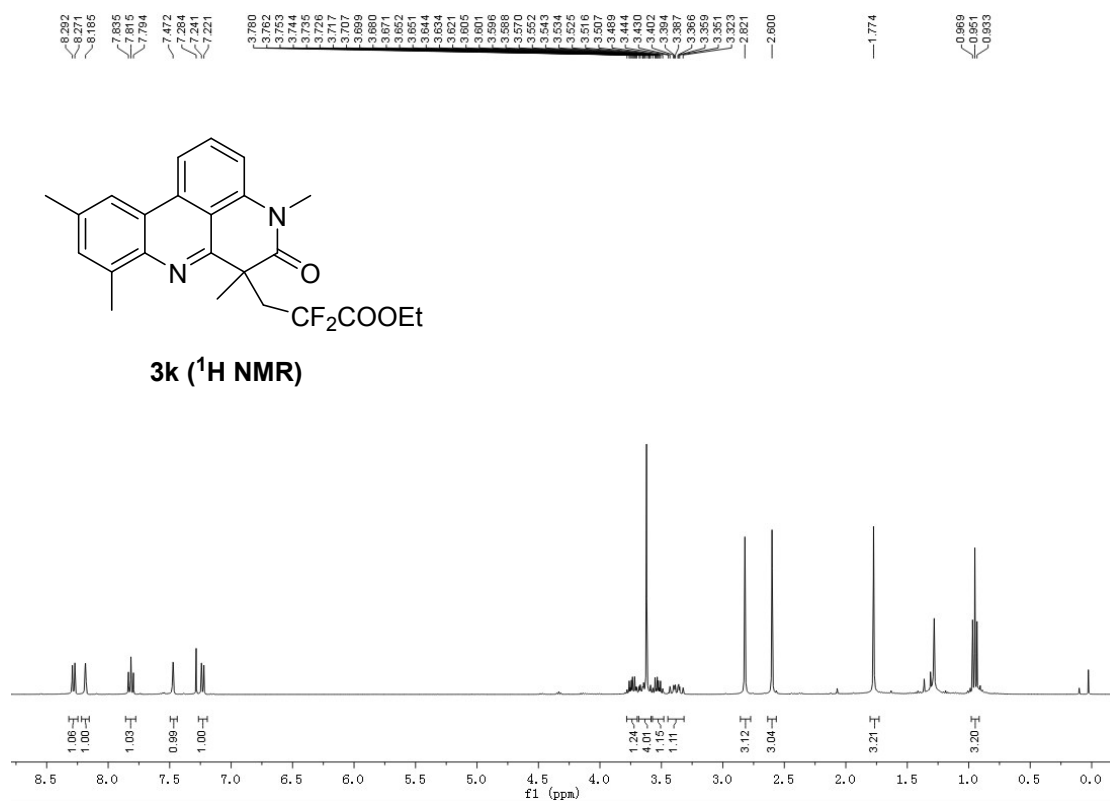

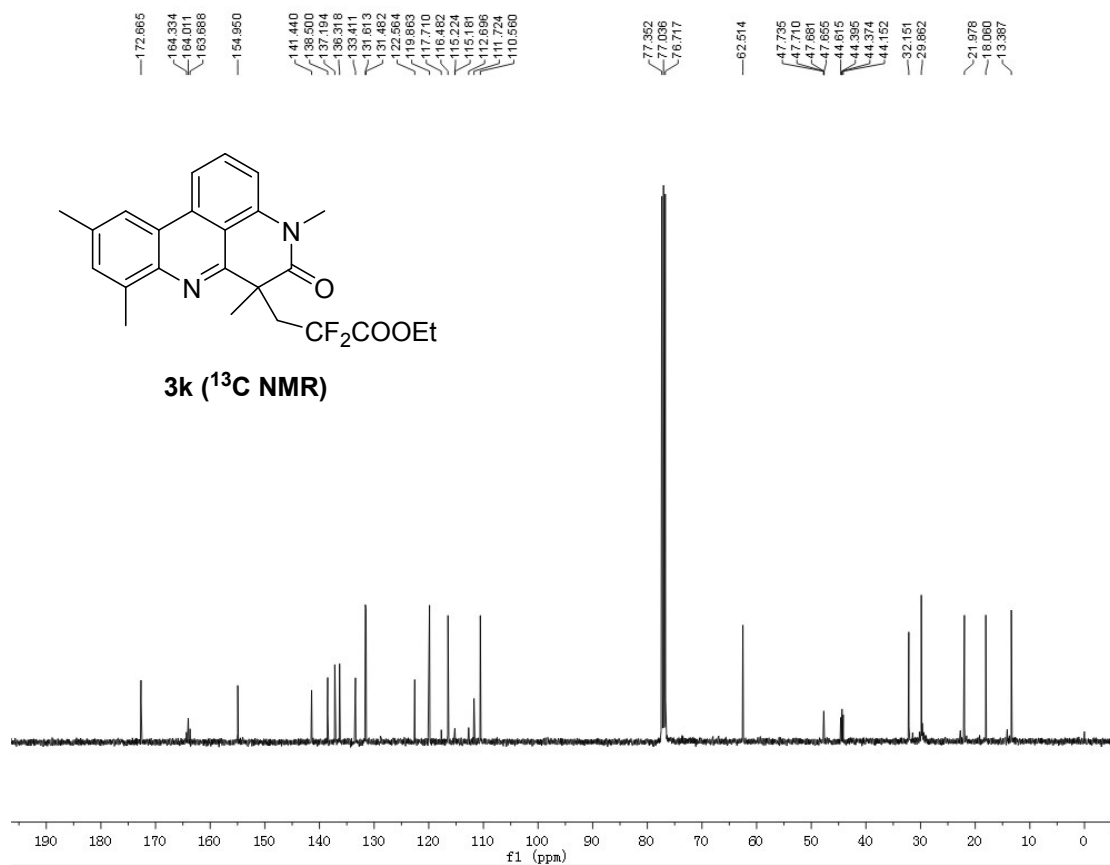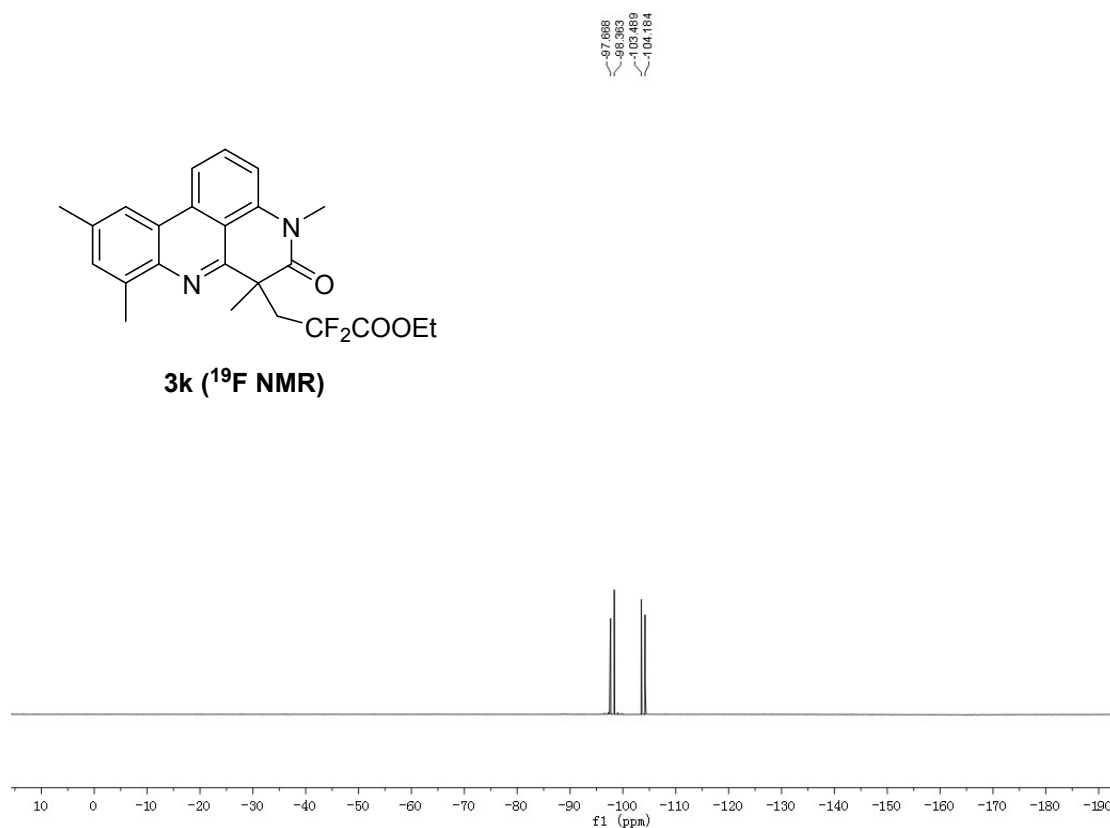



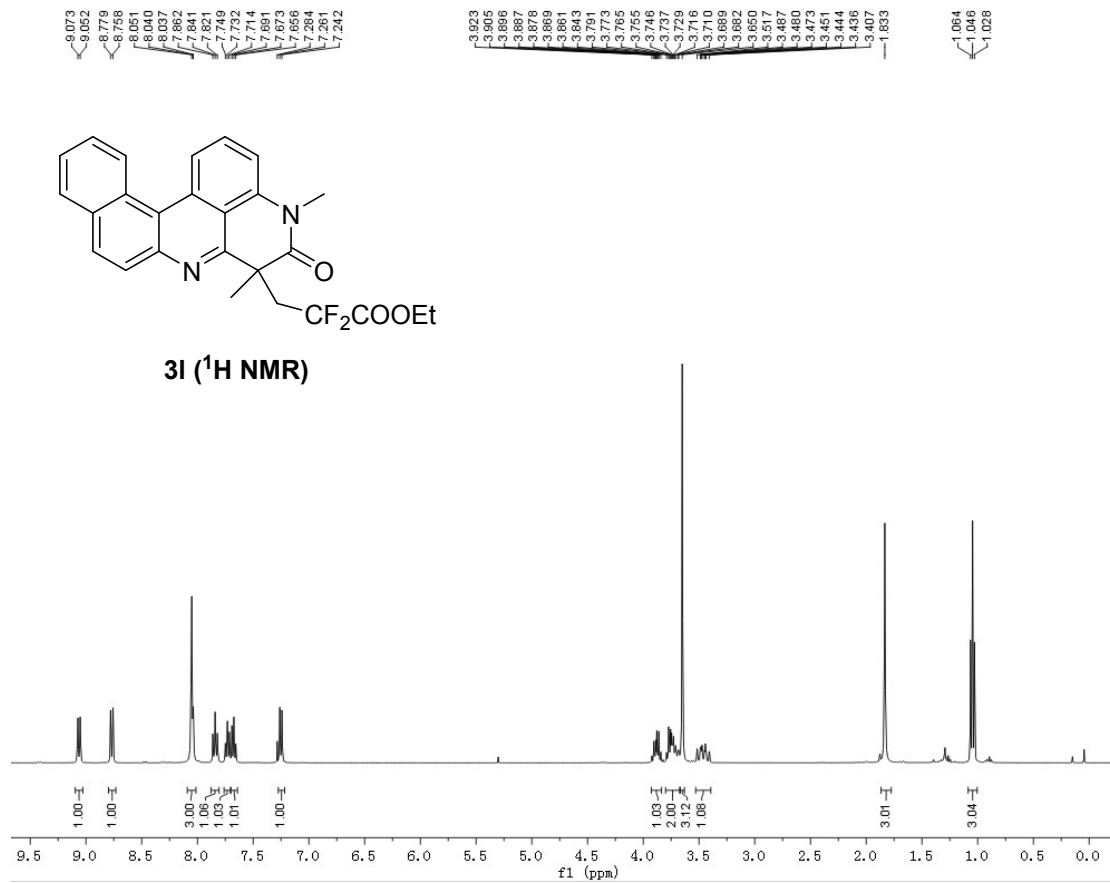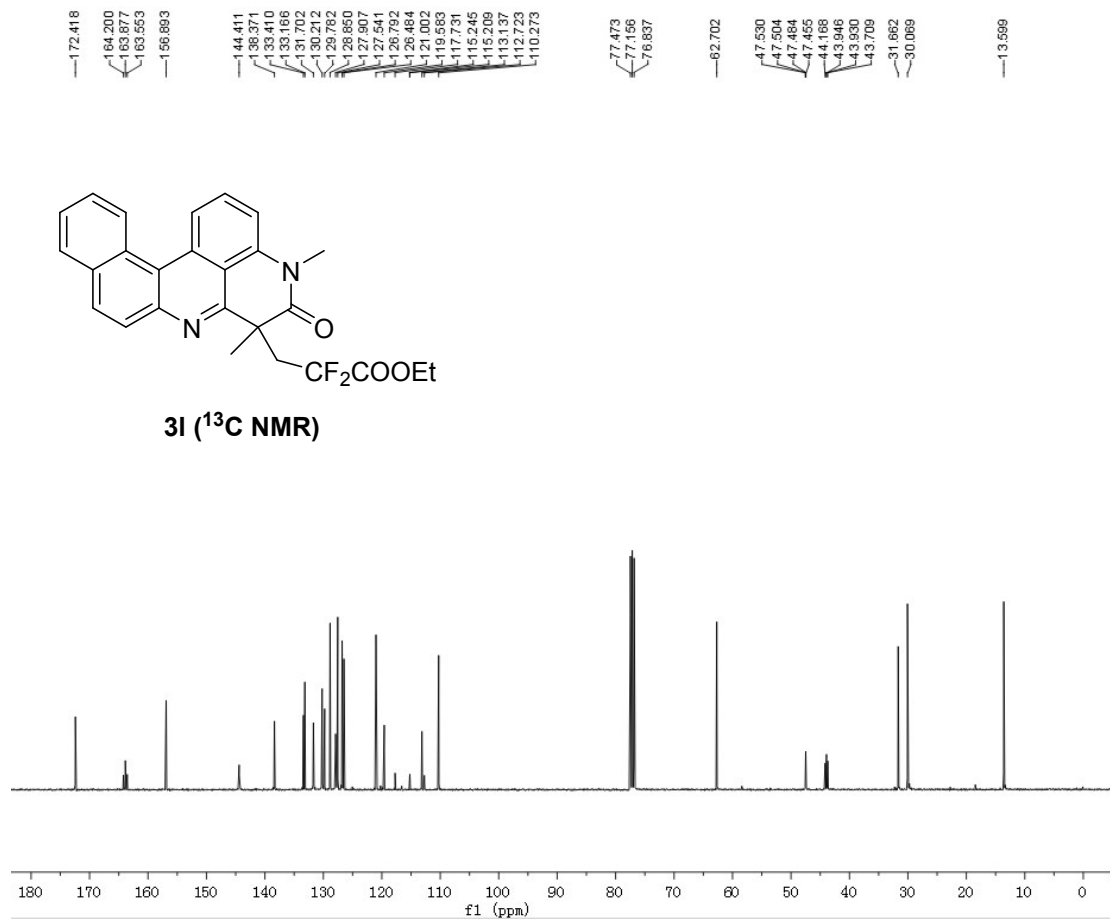



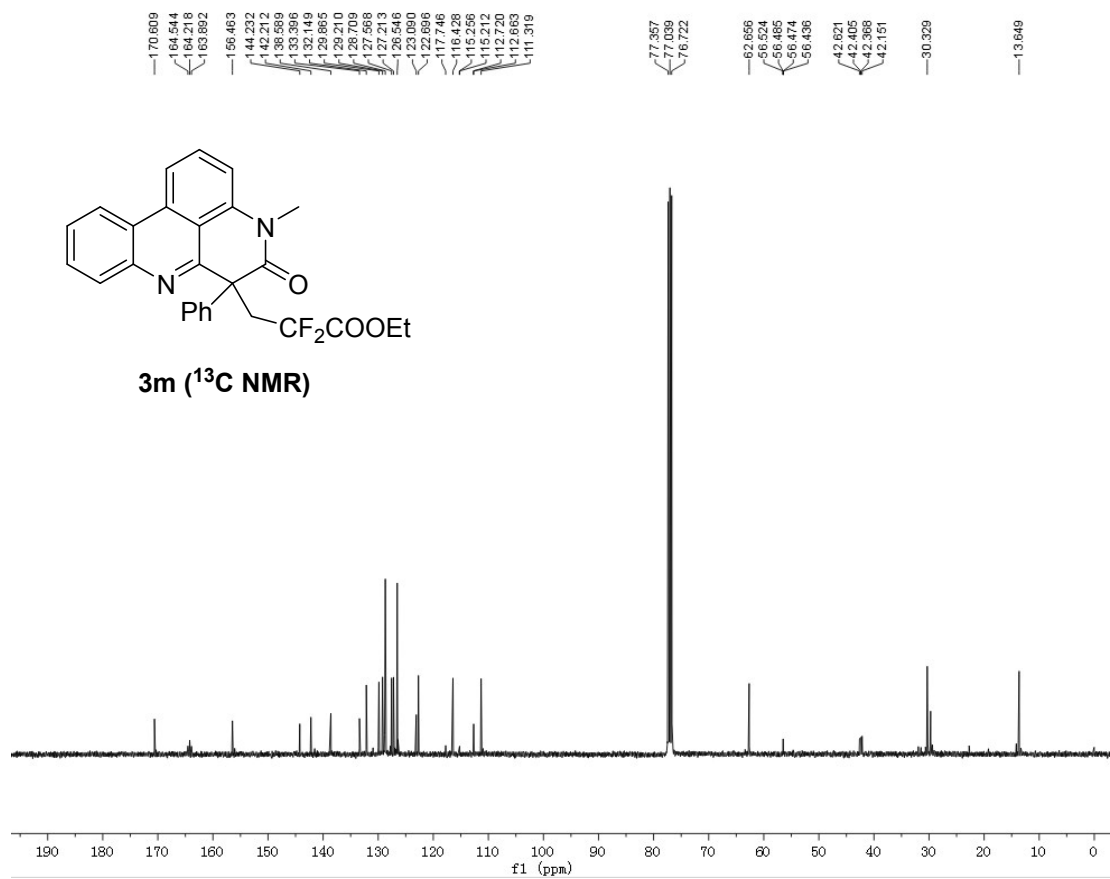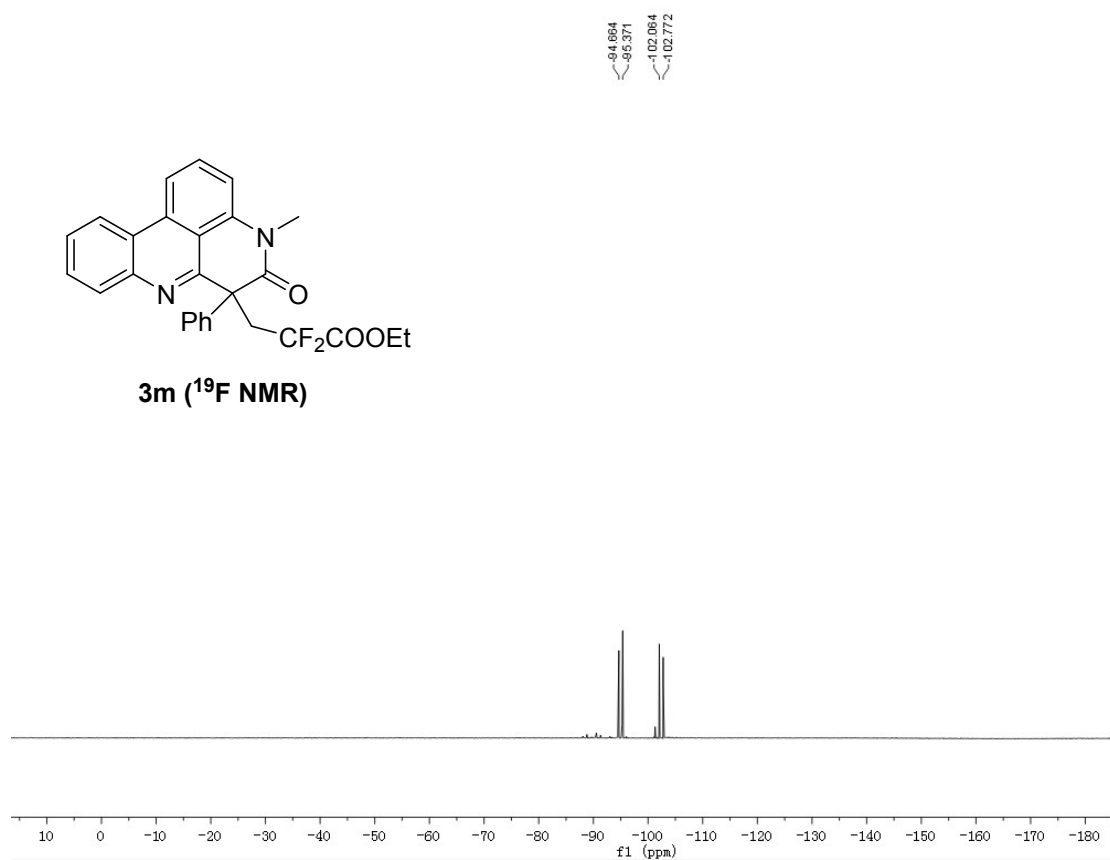

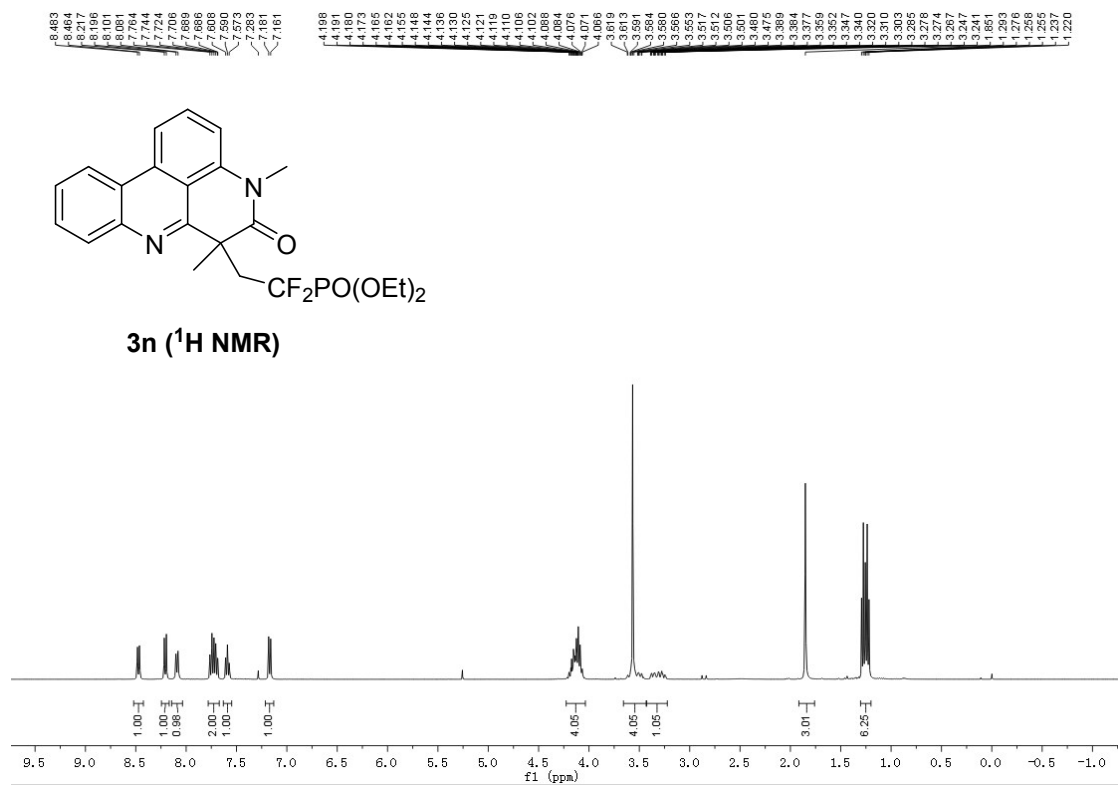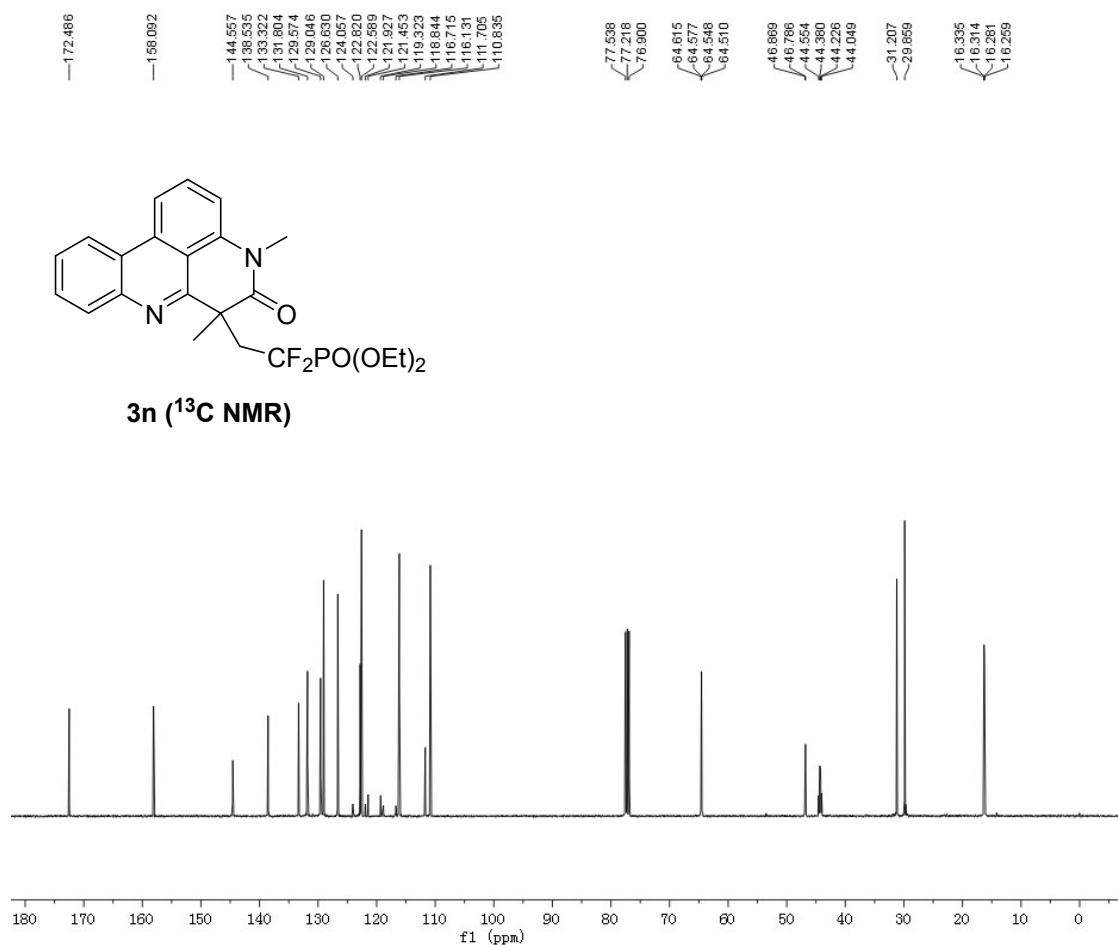

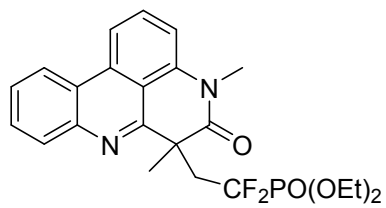

**3n (<sup>19</sup>F NMR)**

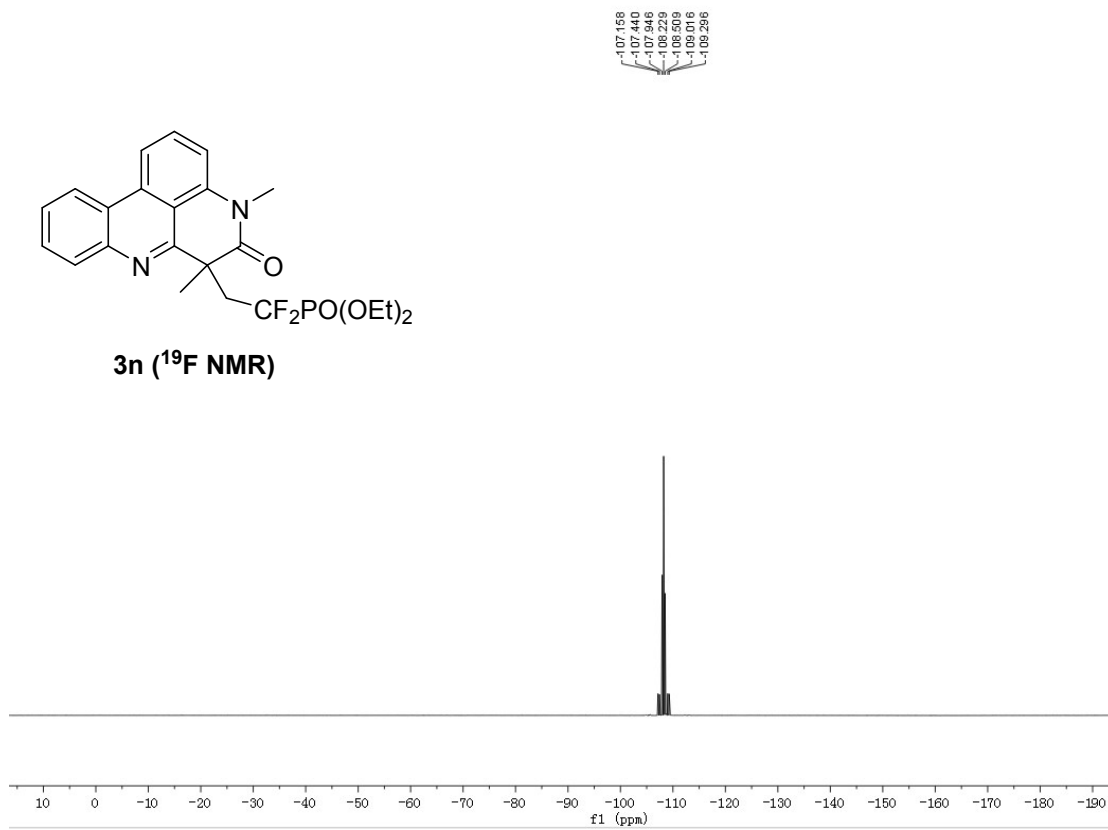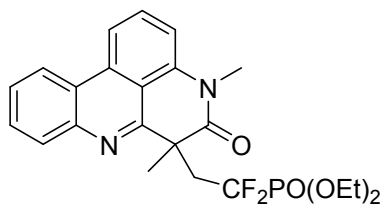

**3n (<sup>31</sup>P NMR)**

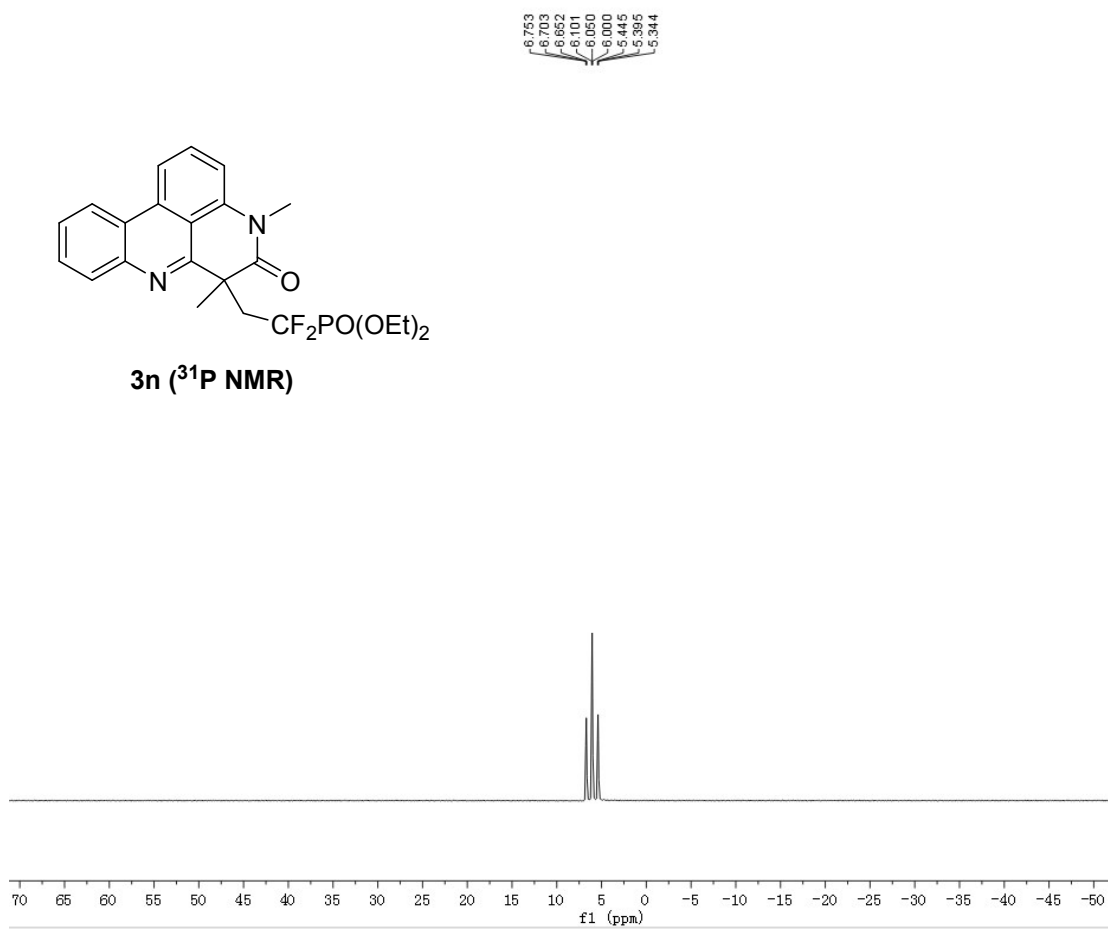

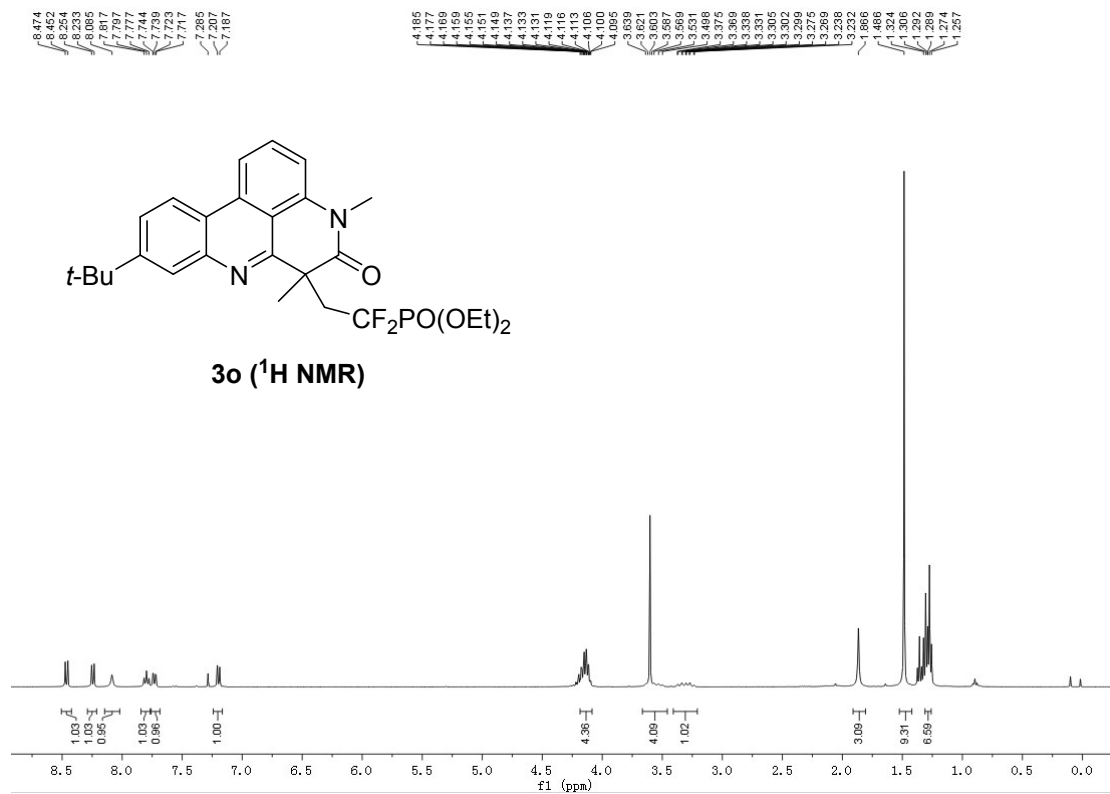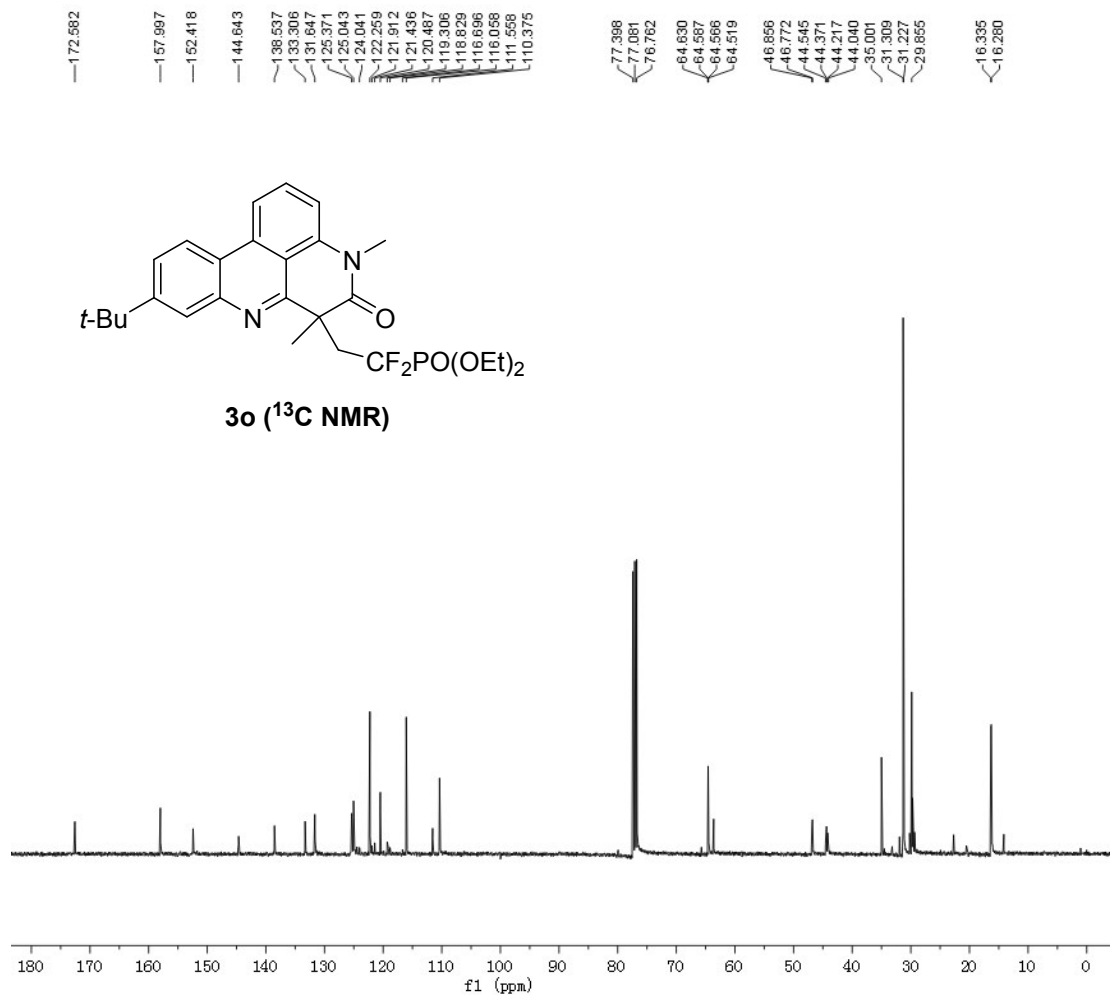

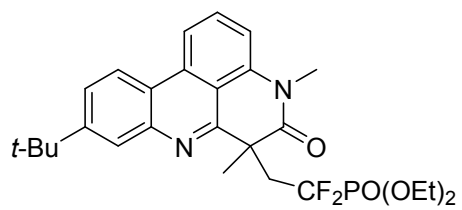

**3o (<sup>19</sup>F NMR)**

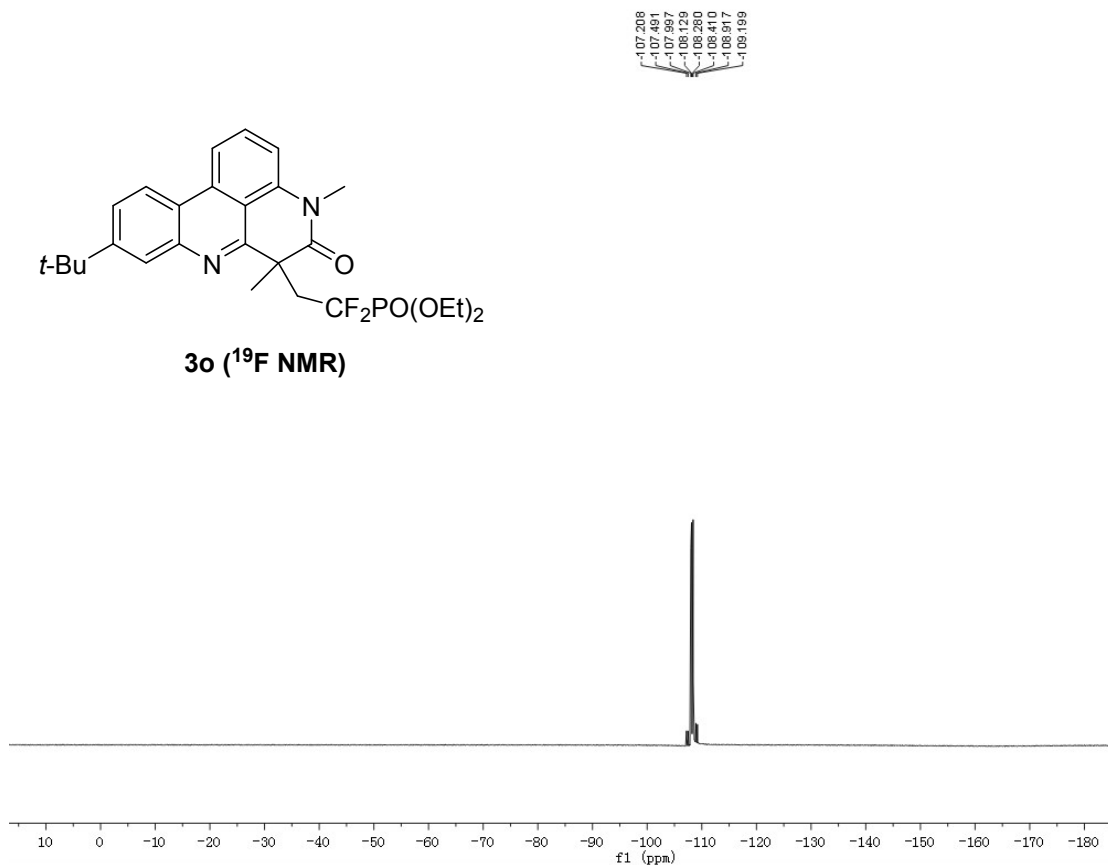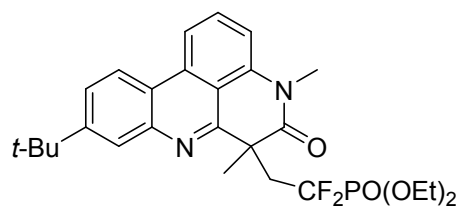

**3o (<sup>31</sup>P NMR)**

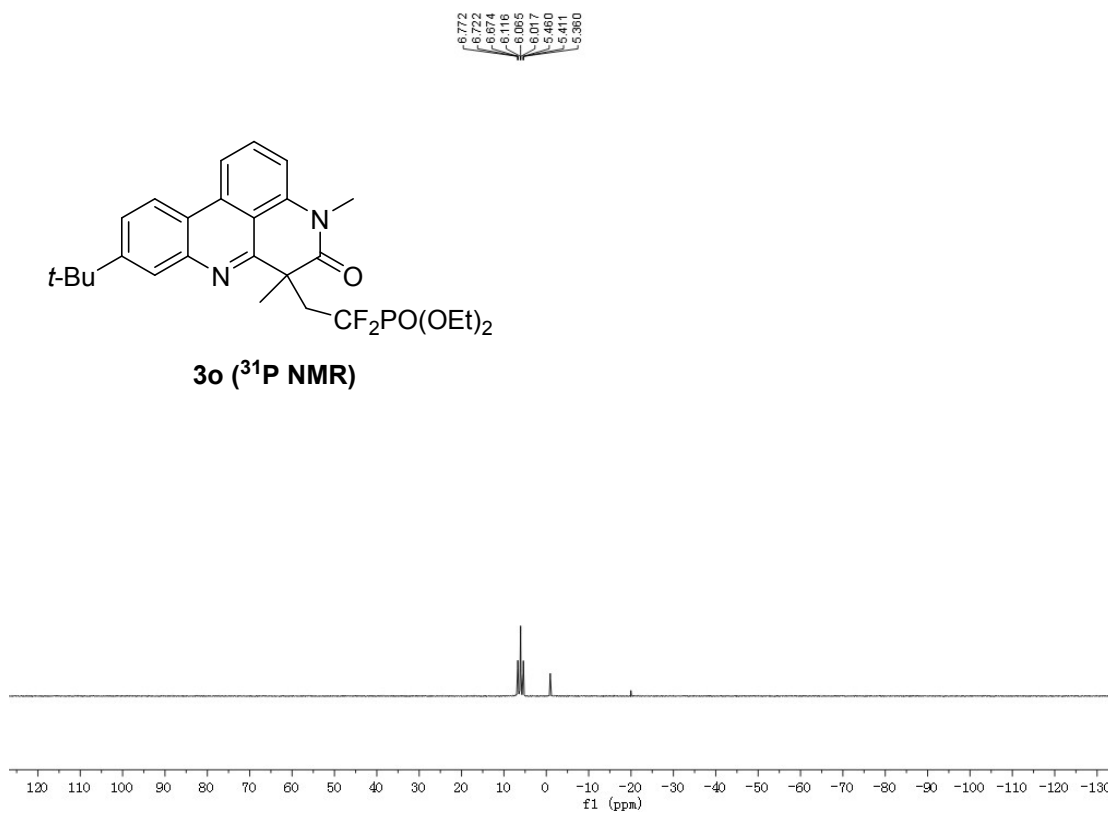

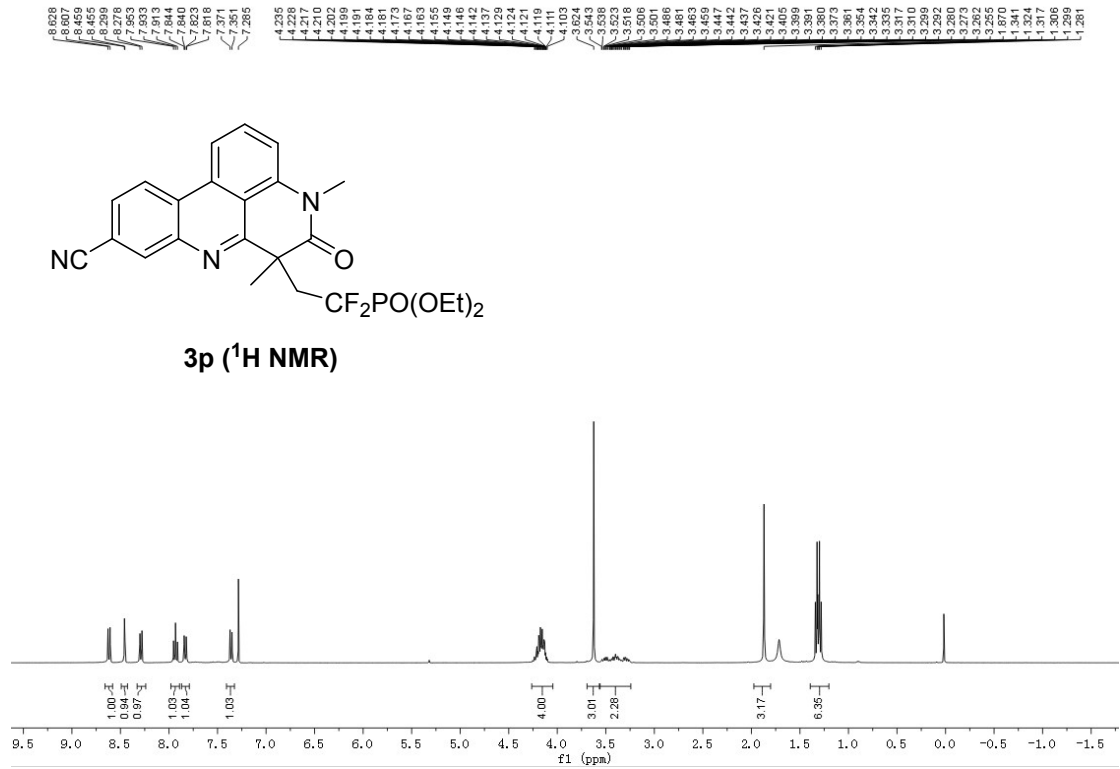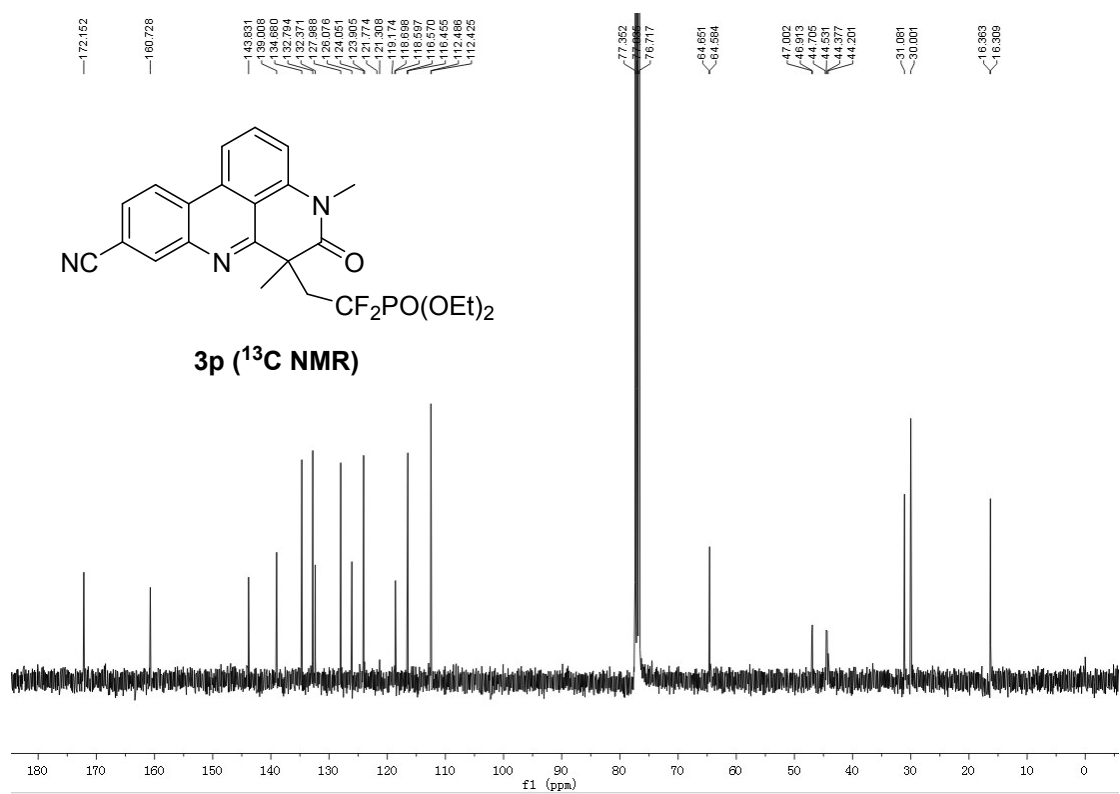



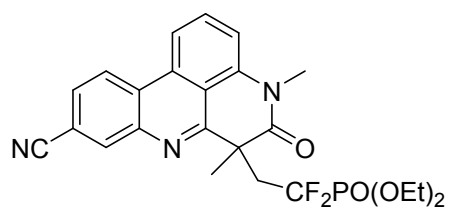

**3p (<sup>19</sup>F NMR)**

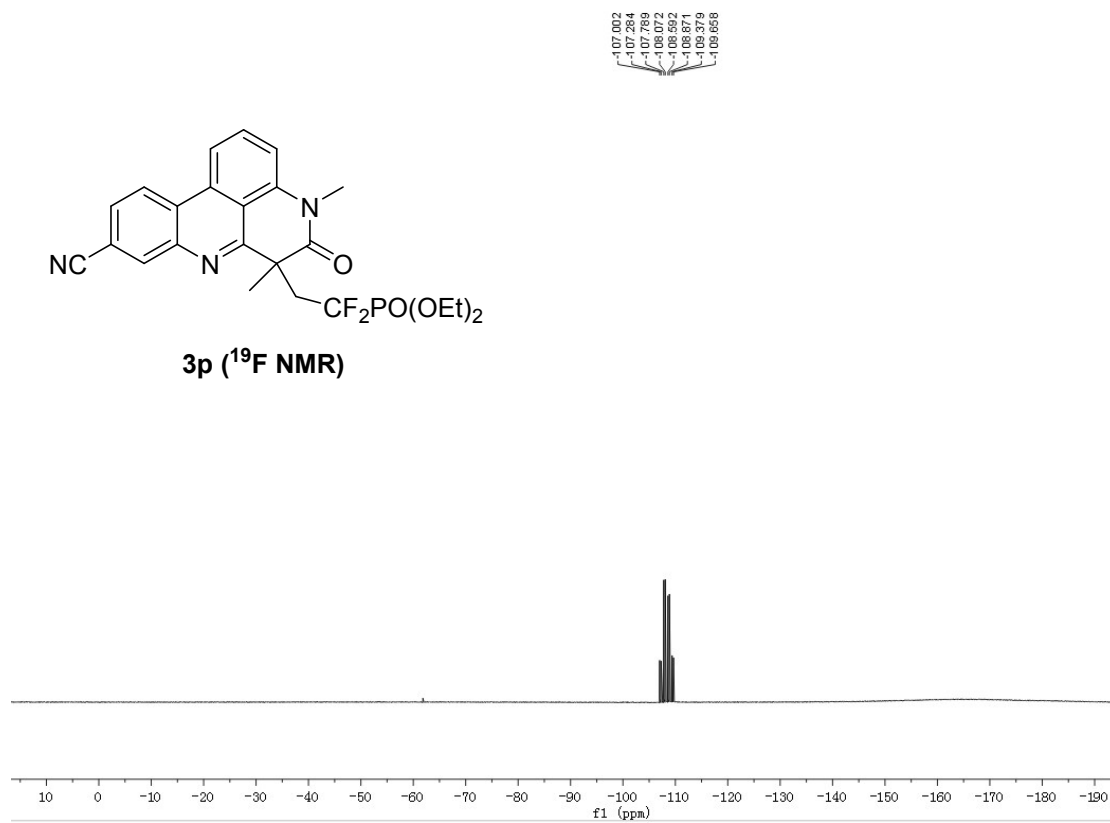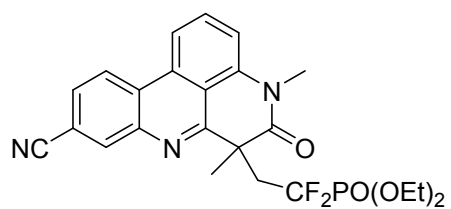

**3p (<sup>31</sup>P NMR)**

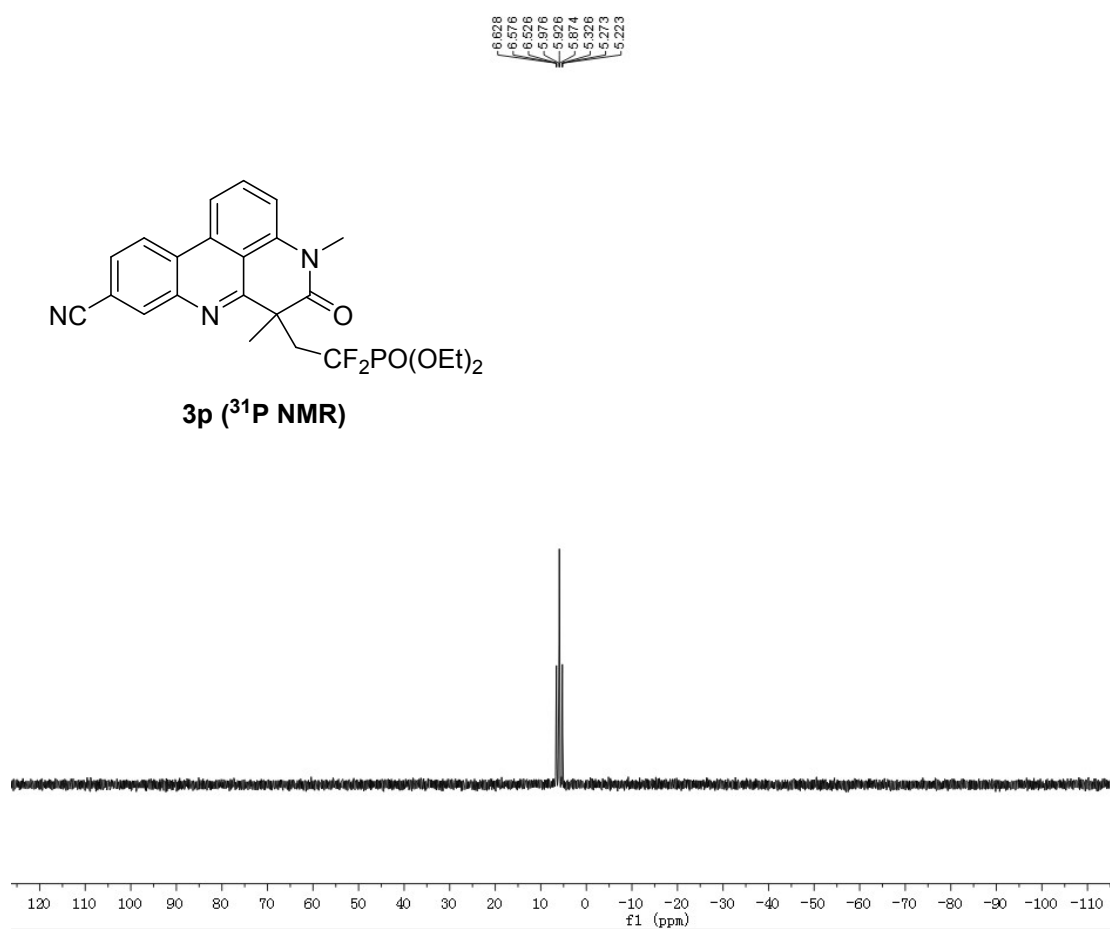

7.331  
7.325  
7.321  
7.316  
7.314  
7.310  
7.307  
7.304  
7.297  
7.293  
7.288  
7.286  
7.283  
7.279  
7.274  
7.272  
7.266  
7.264  
7.258  
7.253  
7.246  
7.240  
7.238  
7.234  
7.231  
7.226  
7.223  
7.220  
7.216  
7.211  
7.208  
7.205  
7.202  
7.199  
7.189  
7.185  
7.177  
7.174  
7.170  
7.168  
7.164  
7.161  
7.156  
7.156  
6.268  
6.239  
3.872  
3.854  
3.836  
3.818

1.115  
1.097  
1.079

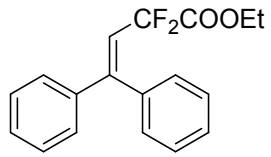

4 (<sup>1</sup>H NMR)

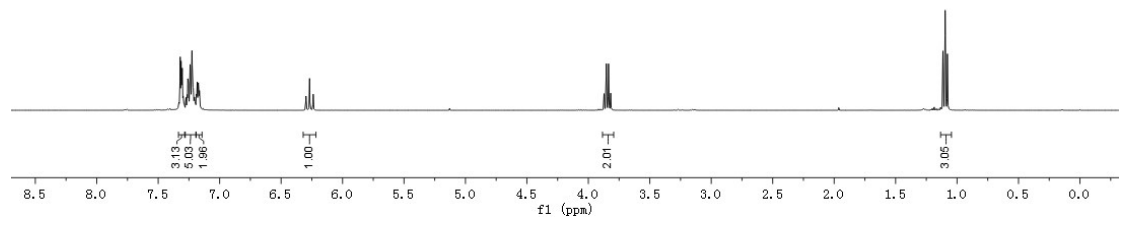

163.804  
163.468  
163.131  
151.237  
151.143  
151.048  
40.521  
37.203  
29.965  
29.251  
28.718  
28.540  
28.138  
27.994  
119.910  
119.627  
119.345  
115.191  
112.757  
110.324

77.672  
77.363  
77.034

62.834

13.714

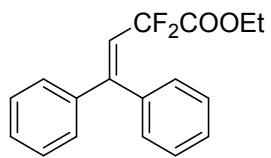

4 (<sup>13</sup>C NMR)

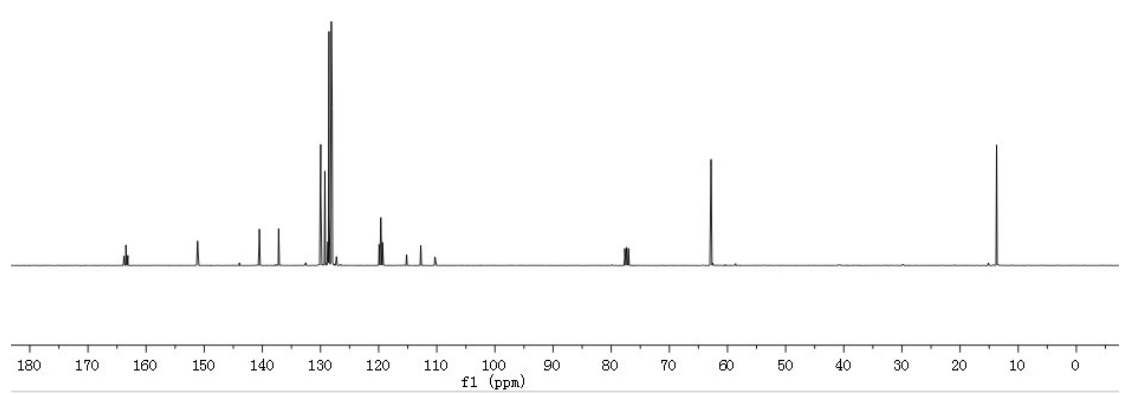

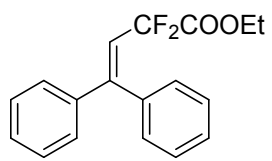

4 (<sup>19</sup>F NMR)

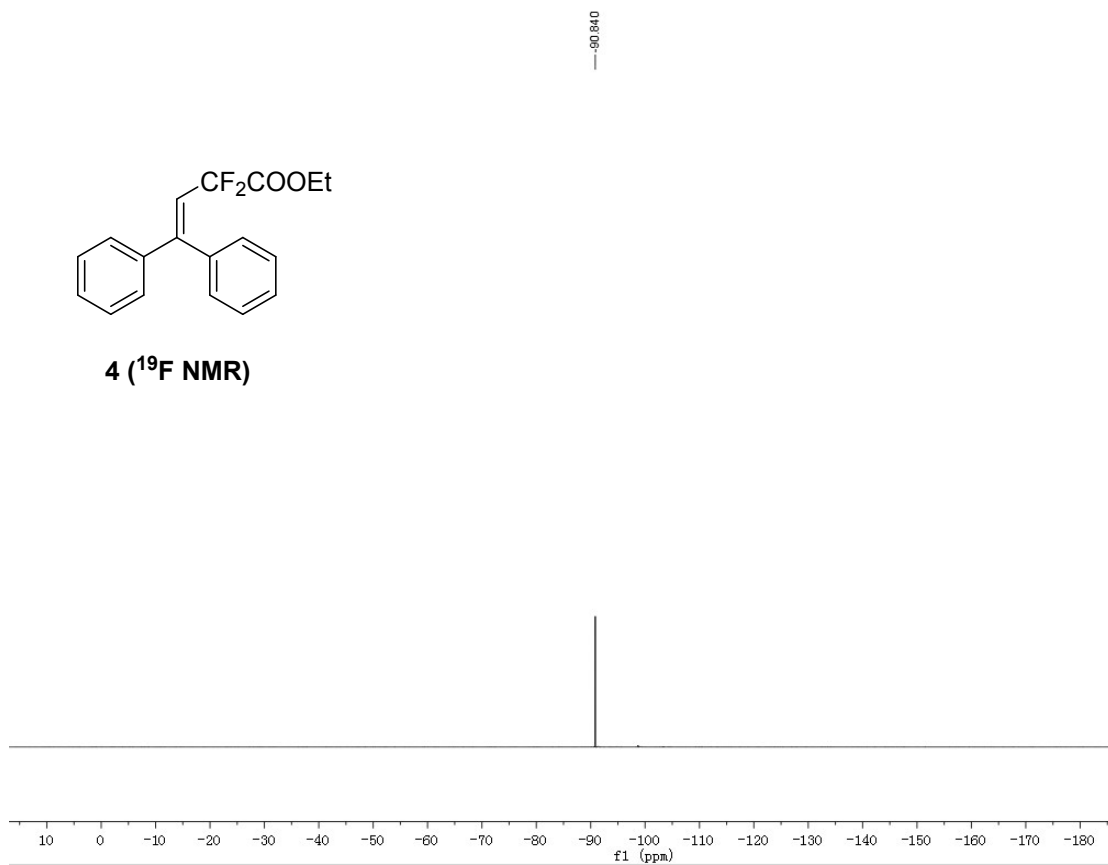

Supplement: c7ob02804k1.pdf [file c7ob02804k1.pdf]
